# Supplementary material for: Lung cancer mortality in the wake of the changing smoking epidemic: a descriptive study of the global burden in 2020 and 2040
Source: PubMed Central journal article supplement — BMJ Open. 2023 May 10;13(5):e065303. doi: 10.1136/bmjopen-2022-065303 (PMC10174019; doi:10.1136/bmjopen-2022-065303), 2023-05-10
Supplement: bmjopen-2022-065303.draft_revisions.pdf [file bmjopen-2022-065303.draft_revisions.pdf]

# BMJ Open

BMJ Open is committed to open peer review. As part of this commitment we make the peer review history of every article we publish publicly available.

When an article is published we post the peer reviewers' comments and the authors' responses online. We also post the versions of the paper that were used during peer review. These are the versions that the peer review comments apply to.

The versions of the paper that follow are the versions that were submitted during the peer review process. They are not the versions of record or the final published versions. They should not be cited or distributed as the published version of this manuscript.

BMJ Open is an open access journal and the full, final, typeset and author-corrected version of record of the manuscript is available on our site with no access controls, subscription charges or pay-per-view fees (<http://bmjopen.bmj.com>).

If you have any questions on BMJ Open's open peer review process please email [info.bmjopen@bmj.com](mailto:info.bmjopen@bmj.com)

# BMJ Open

## A global analysis of the current and future lung cancer mortality in the wake of the changing smoking epidemic. A descriptive case report study.

|                               |                                                                                                                                                                                                                                                                                                                                                                                                                                                                                                                                                                                                                                                                                                                                                                                                                                                                                                                                                                                                                                                                                         |
|-------------------------------|-----------------------------------------------------------------------------------------------------------------------------------------------------------------------------------------------------------------------------------------------------------------------------------------------------------------------------------------------------------------------------------------------------------------------------------------------------------------------------------------------------------------------------------------------------------------------------------------------------------------------------------------------------------------------------------------------------------------------------------------------------------------------------------------------------------------------------------------------------------------------------------------------------------------------------------------------------------------------------------------------------------------------------------------------------------------------------------------|
| Journal:                      | <i>BMJ Open</i>                                                                                                                                                                                                                                                                                                                                                                                                                                                                                                                                                                                                                                                                                                                                                                                                                                                                                                                                                                                                                                                                         |
| Manuscript ID                 | bmjopen-2022-065303                                                                                                                                                                                                                                                                                                                                                                                                                                                                                                                                                                                                                                                                                                                                                                                                                                                                                                                                                                                                                                                                     |
| Article Type:                 | Original research                                                                                                                                                                                                                                                                                                                                                                                                                                                                                                                                                                                                                                                                                                                                                                                                                                                                                                                                                                                                                                                                       |
| Date Submitted by the Author: | 07-Jun-2022                                                                                                                                                                                                                                                                                                                                                                                                                                                                                                                                                                                                                                                                                                                                                                                                                                                                                                                                                                                                                                                                             |
| Complete List of Authors:     | Weber, Andras; International Agency for Research on Cancer, Cancer Surveillance Branch; National Institute of Oncology, Hungarian National Cancer Registry<br>Vignat, Jerome; International Agency for Research on Cancer<br>Laversanne, Mathieu; International Agency for Research on Cancer, Cancer Surveillance Branch<br>Morgan, Eileen; International Agency for Research on Cancer<br>Pizzato, Margherita; International Agency for Research on Cancer; University of Milan, Department of Clinical Sciences and Community Health<br>Rumgay, Harriet; International Agency for Research on Cancer<br>Singh, Deependra; International Agency for Research on Cancer<br>Nagy, Péter; National Institute of Oncology, Department of Molecular Immunology and Toxicology; University of Veterinary Medicine, Department of Anatomy and Histology<br>Kenessey, István; National Institute of Oncology; Semmelweis University, Department of Pathology, Forensic and Insurance Medicine<br>Soerjomataram, Isabelle; WHO<br>Bray, Freddie; Int Agcy Res Canc, Cancer Surveillance Branch |
| Keywords:                     | Epidemiology < TROPICAL MEDICINE, Health policy < HEALTH SERVICES ADMINISTRATION & MANAGEMENT, PUBLIC HEALTH                                                                                                                                                                                                                                                                                                                                                                                                                                                                                                                                                                                                                                                                                                                                                                                                                                                                                                                                                                            |
|                               |                                                                                                                                                                                                                                                                                                                                                                                                                                                                                                                                                                                                                                                                                                                                                                                                                                                                                                                                                                                                                                                                                         |

SCHOLARONE™  
Manuscripts

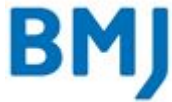

I, the Submitting Author has the right to grant and does grant on behalf of all authors of the Work (as defined in the below author licence), an exclusive licence and/or a non-exclusive licence for contributions from authors who are: i) UK Crown employees; ii) where BMJ has agreed a CC-BY licence shall apply, and/or iii) in accordance with the terms applicable for US Federal Government officers or employees acting as part of their official duties; on a worldwide, perpetual, irrevocable, royalty-free basis to BMJ Publishing Group Ltd ("BMJ") its licensees and where the relevant Journal is co-owned by BMJ to the co-owners of the Journal, to publish the Work in this journal and any other BMJ products and to exploit all rights, as set out in our [licence](#).

The Submitting Author accepts and understands that any supply made under these terms is made by BMJ to the Submitting Author unless you are acting as an employee on behalf of your employer or a postgraduate student of an affiliated institution which is paying any applicable article publishing charge ("APC") for Open Access articles. Where the Submitting Author wishes to make the Work available on an Open Access basis (and intends to pay the relevant APC), the terms of reuse of such Open Access shall be governed by a Creative Commons licence – details of these licences and which [Creative Commons](#) licence will apply to this Work are set out in our licence referred to above.

Other than as permitted in any relevant BMJ Author's Self Archiving Policies, I confirm this Work has not been accepted for publication elsewhere, is not being considered for publication elsewhere and does not duplicate material already published. I confirm all authors consent to publication of this Work and authorise the granting of this licence.

1  
2  
3 **A global analysis of the current and future lung cancer mortality in the wake of the changing**  
4 **smoking epidemic. A descriptive case report study.**  
5  
6

7 András Wéber PhD<sup>1,2</sup>, Jerome Vignat MSc<sup>1</sup>, Mathieu Laversanne MSc<sup>1</sup>, Eileen Morgan  
8 PhD<sup>1</sup>, Margherita Pizzato PhD<sup>1,3</sup>, Harriet Runggay MSc<sup>1</sup>, Deependra Singh PhD<sup>1</sup>, Péter Nagy DSc<sup>4,5,6</sup>,  
9 István Kenessey MD PhD<sup>2,7</sup>, Isabelle Soerjomataram PhD<sup>1</sup>, Freddie Bray PhD<sup>1</sup>  
10  
11  
12  
13  
14  
15

16 <sup>1</sup> Cancer Surveillance Branch, International Agency for Research on Cancer, Lyon, France  
17

18 <sup>2</sup> Hungarian National Cancer Registry and National Tumorbiology Laboratory, National Institute of  
19 Oncology, Budapest, Hungary  
20  
21

22 <sup>3</sup> Department of Clinical Sciences and Community Health, University of Milan, Milan, Italy.  
23

24 <sup>4</sup> Department of Molecular Immunology and Toxicology and National Tumorbiology Laboratory,  
25 National Institute of Oncology, Budapest, Hungary  
26  
27

28 <sup>5</sup> Department of Anatomy and Histology, Laboratory of Redox Biology, University of Veterinary  
29 Medicine, Budapest, Hungary  
30  
31

32 <sup>6</sup> Institute of Oncochemistry, University of Debrecen, Debrecen, Hungary  
33  
34

35 <sup>7</sup> Department of Pathology, Forensic and Insurance Medicine, Semmelweis University, Budapest,  
36 Hungary  
37  
38  
39  
40  
41  
42

43 Corresponding author:  
44

45 András Wéber  
46

47 Cancer Surveillance Branch  
48 International Agency for Research on Cancer  
49 email: webera@iarc.fr  
50

51 Hungarian National Cancer Registry  
52 National Institute of Oncology  
53 email: weber.andras@oncol.hu  
54  
55  
56  
57  
58  
59  
60

## Abstract

### *Objectives*

Lung is a highly frequent localization of neoplasms and it ranks as leading cause of cancer death. The purpose of this paper is to present a global overview of the descriptive epidemiology of lung cancer, based on the GLOBOCAN estimates for the year 2020 from the International Agency for Research on Cancer and relate this to current tobacco control policies.

### *Methods*

Age-standardized mortality rates per 100,000 person-years of lung cancer for 185 countries were obtained from GLOBOCAN 2020 database and analysed by sex and levels of HDI. Lung cancer deaths were projected to 2040 based on demographic changes alongside scenarios of increasing, stable or decreasing rates, annually from the baseline year of 2020.

### *Results*

Lung cancer rates exhibited marked variations by geography and sex. Low HDI countries, many of them within sub-Saharan Africa, tend to have low levels of mortality and only an upward trend in the number of lung cancer deaths is predicted for both sexes until 2040 according to all demographic projections. Different picture is true for the very high HDI countries, such as the majority of Europe, entire Northern America and Australia: a clearly improving trends for men and deteriorating for women.

### *Conclusion*

The current and future burden of lung cancer in a country or region largely depends on where its population is placed on the trajectory of the global smoking epidemic. The distinct gender characteristics in smoking are very important, both in transitioning and developed countries. The diminishing sex differences in the smoking related mortality highlight and project the likelihood of increasing inequities in health among women. Further elevations in lung cancer mortality are expected worldwide, raising important social and political questions, especially in low- and middle-income countries.

**Keywords:** lung cancer, mortality, projection

**Word count:** 2,766

## Strengths and limitations of this study

### *Strengths*

This study:

- presents a detailed picture and figures of current LC burden worldwide by sex and HDI.
- applies a simple and straightforward projection model for the near future along the dimensions above.
- considers broadly the essential literature on the risk factors for lung cancer especially on the smoking epidemic, in order to provide a comprehensive understanding of the phenomenon discussed.

### *Limitations*

This study:

- struggles with large variability in the availability and quality of cancer causes of death data. E.g. in countries where mortality series were not available from national vital registration sources systematic estimates were necessary to calculate.

## Introduction

Lung cancer (LC) ranks as the most frequent form of cancer death and premature cancer death (ages 30-69) with still uniformly low 5-year survival even in high-income countries<sup>1</sup>. With one-fifth of the cancer mortality worldwide in 2020 due to LC – an estimated 1.8 million deaths<sup>2</sup> – the single most determining risk factor remains to be tobacco consumption. Up to 9 out of 10 LC cases are caused by smoking in high-income settings, while mortality increases with number of cigarettes smoked and smoking duration<sup>3</sup>. Lopez et al. drew attention to the phases of the global smoking epidemic and the subsequent impact of smoking on LC occurrence by sex<sup>4</sup>; men and women remain in very different phases of the smoking epidemic, as reflected in disease rates by birth cohort. Recent reports have generally described marked variations in rates between sexes, with stable or decreasing rates found predominantly among male while increasing rates among female populations<sup>5,6</sup>. An emerging pattern is a higher rate among young females than males across geographic areas and income levels, that is not fully explained by sex-specific differences in smoking prevalence<sup>7</sup>. Such temporal patterns forewarn of a higher LC burden in women than men at older ages in the decades to follow, especially in higher-income settings. However, low- and middle-income countries exhibit contrasting image: numerically most women are exposed to smoking in developing countries and social constraints that previously prevented them from tobacco consumption are weakening<sup>8</sup>, but they not necessarily taking up the habit like men e.g. in China.<sup>9</sup>

The purpose of this paper is to present a global overview on the descriptive epidemiology of LC in the context of tobacco control, based on the recent GLOBOCAN mortality estimates for the year 2020 from the International Agency for Research on Cancer (IARC). In addition, we provide projections of the future mortality burden according to different temporal scenarios to the year 2040, estimating the expected future LC deaths according to levels of Human Development Index (HDI).

## Data Sources and Methods

The number of deaths from, cancers of the lung (ICD-10 C33-34, including trachea and bronchus) were extracted from IARC's GLOBOCAN 2020 database for 185 countries or territories, by sex and 18 age groups (0-4, 5-9, ..., 80-84, 85 and over)<sup>2,10,11</sup>. Corresponding population data for 2020 were extracted from the United Nations (UN) website<sup>12</sup>. The data sources and hierarchy of methods used in compiling the cancer estimates have been described in detail elsewhere<sup>10</sup>. In brief, the GLOBOCAN estimates are assembled at the national level using the best available sources of cancer incidence and mortality data within a given country. The methods used to derive the 2020 estimates corresponding to those used to derived for previous years<sup>13-15</sup> where applicable, priority is given to short-term predictions and modelled mortality to incidence (M:I) ratios, while validity is dependent on the degree of representativeness and quality of the source information<sup>10</sup>.

1  
2  
3 We present figures based on the estimated deaths in 2020, as well as two summary measures using  
4 direct standardization, namely the age-standardized mortality rate (ASR) per 100,000 person-years  
5 based on the 1966 Segi-Doll World standard population<sup>16,17</sup> and the cumulative risk of dying from cancer  
6 before the age of 75 expressed as a percentage, assuming the absence of competing causes of death<sup>18</sup>.  
7 These measures allow comparisons between populations adjusted for differences in age structures. We  
8 also provide a prediction of the future number of LC deaths worldwide for the year 2040, based on  
9 demographic projections and scenarios of uniformly increasing (+3%, +2%, +1%), stable (0%) or  
10 decreasing (-1%, -2%, -3%) rates annually from the baseline year of 2020. The possible impact of  
11 COVID-19 pandemic was not taken into consideration during the calculations.

12  
13  
14  
15  
16  
17 The results are presented by country, and aggregated, across 20 UN-defined world regions<sup>12</sup>, and  
18 according to the UN's four-tier HDI in 2020<sup>19</sup> as a means to assess the cancer burden across four levels  
19 of development (low, medium, high and very high HDI). Throughout we use the terms transitioning,  
20 emerging and lower HDI countries/economies as synonyms for nations classified as low or medium  
21 HDI, and transitioning or higher HDI countries/economies for those classified as high or very high HDI.

22  
23  
24  
25 The Global Cancer Observatory (GCO, <https://gco.iarc.fr>) includes facilities for the tabulation  
26 and graphical visualization of the GLOBOCAN database, including explorations of the current<sup>2</sup> and  
27 future<sup>20</sup> burden for 36 cancer types.

28  
29  
30 Patient and Public Involvement: Patients or the public WERE NOT involved in the design, or  
31 conduct, or reporting, or dissemination plans of our research  
32  
33  
34  
35  
36

## 37 **Results**

### 38 *Lung cancer mortality – national rankings 2020*

39  
40 Figure 1 presents global maps that indicate LC's position in terms of deaths relative to other  
41 common tumors at the national level by sex for the year 2020. In men, LC ranks first in half of the  
42 countries included in the GLOBOCAN estimates (93 of 185 countries) and it ranks 2<sup>nd</sup> or 3<sup>rd</sup> in 37  
43 countries. LC is a major contributor to cancer mortality around the world, including America, Greater-  
44 Europe, Northern Africa, and across the Asia-Pacific region. Only the regions of Central America and  
45 Sub-Saharan Africa (but not South Africa) indicating a somewhat less dominant role of the disease, at  
46 present. In women, the impact is lesser but still very much in evidence; the disease ranks as the leading  
47 form of cancer death in 25 countries including those within North America, Northern, Western and  
48 Southern-Central Europe, Eastern Asia and Australia/New Zealand. It ranks as the 2<sup>nd</sup> or 3<sup>rd</sup> leading  
49 form of cancer mortality in 54 countries worldwide.

50  
51  
52  
53  
54  
55  
56  
57 According to Figure 2 there is at least a 20-fold variation between the rates in both sexes, with rates  
58 uniformly higher among men. Male mortality is higher in Eastern and Southern Europe (especially in  
59 Hungary and Serbia with nearly 60 deaths per 100,000), Eastern Asia (particularly in the Democratic  
60



1  
2  
3 People's Republic of Korea) and Polynesia and Micronesia, while it is lower in Central America, South-  
4 Central Asia and most parts of sub-Saharan Africa. The highest female rates are seen in Northern  
5 America, Northern and Western Europe, and Australia/New Zealand specifically in Canada, Denmark  
6 and the Netherlands, respectively. Relatively low rates are observed in Western-, South-Eastern Asia  
7 and across the African continent, except for Southern Africa.  
8  
9

### 10 11 *Lung cancer mortality burden by 2040*

12  
13 Figure 3 demonstrates that if the trends do not change in the next two decades, LC will claim  
14 around 2 million male deaths in 2040, compared to 1.2 million in 2020. For women, the corresponding  
15 predicted and registered numbers are approximately half: 1 million and 600 000 deaths, respectively.  
16 The projection also shows the different scenarios considering the changing rates per year between -3%  
17 and +3%. Keeping in mind the axioms of the theory of global smoking epidemic<sup>4</sup>, global declines in the  
18 number of LC among males but increases for female are more realistic scenarios in the future, with  
19 exceptions. Taking this into account, by 2040, the predicted number of deaths due to LC for men will  
20 likely range between 1.1 and 1.6 million and for women between 1.2 and 1.8 million. Appendix Figure  
21 1a-d also reports the projections by HDI levels, which show, that in the lowest category of HDI  
22 countries, deaths will markedly increase for both sexes even in the best-case LC mortality scenario.  
23  
24  
25  
26  
27  
28  
29  
30

### 31 **Discussion**

32  
33 This research highlights the inverse status of low and high HDI countries, in case of the current  
34 geographic variability of LC burden and the very different scenarios of changing mortality trends also  
35 by sex. Countries with low HDI, can be characterized with low levels of mortality, in mostly sub-  
36 Saharan African states and these will probably suffer a higher burden of LC for both sexes until 2040.  
37 For higher HDI countries, the burden of the disease is higher for men, but future trends appear be more  
38 favourable than for females, where increasing LC mortality is more likely till 2040.  
39  
40  
41  
42  
43

44 The past smoking histories of nations are a key determinant of the current magnitude of LC in  
45 many populations worldwide, as described by the classical model of the global smoking epidemic, first  
46 introduced by Lopez et al<sup>4</sup>. In the model, the effect of different smoking patterns was captured by four  
47 stages in the population, by an earlier adoption of the habit in men compared with women, and by the  
48 progressive adoption among lower socioeconomic classes, where the habit continues to be an underlying  
49 cause of the marked inequalities seen in different educational groups<sup>21</sup>. Lopez et al. initially applied their  
50 theory on only just a few developed countries<sup>22</sup>, but later was tested on greater geographic scales<sup>23,24</sup>.  
51 Nevertheless, as smoking prevalence and subsequent LC rates began to peak and decline among men in  
52 many populations over the last decades, a key focus has been the deteriorating public health situation  
53 affecting women, where in many settings, rates of LC mortality continue to rise. This raises several  
54 relevant biological, epidemiological and sociological concerns<sup>25</sup>, including: the change on the main  
55  
56  
57  
58  
59  
60

1  
2  
3 histological types of LC over time<sup>26</sup>, the extent to which females adopted the habit of smoking and their  
4 vulnerability to the tobacco industry<sup>27,28</sup>, the impact of such a transition in diminishing gender  
5 differences in disease burden worldwide<sup>29</sup> and the effects of different political ruling systems on the  
6 health awareness of individuals<sup>30,31</sup>, which are well reflected e.g. in the current Eastern European vs.  
7 Northern European male lung cancer mortality figures. However, this paper clearly proves that for most  
8 of the low HDI countries this comprehensive macro theory is not applicable, whereas LC deaths from a  
9 relatively low level are expected to simultaneously rise for both sexes.  
10  
11  
12  
13

14  
15 Smoking is of course not the only risk factor for LC. There is strong evidence of a relation with  
16 other factors, e.g., air pollution, climate change<sup>32</sup> and other occupational risk factors such as asbestosis  
17 and indoor exposure to cooking fumes etc<sup>33</sup>. The highest exposure to ambient air pollution is the  
18 characteristic of mainly Low and Low Middle-Income Countries (LMICs), where only modest  
19 reductions in burden will occur in the most polluted countries unless fine particulate matter (PM 2.5)  
20 values are decreased substantially<sup>34</sup>.  
21  
22  
23  
24

25 There are several limitations to this study e.g., the large variability in the availability and quality  
26 of cancer mortality data. Many African and some Asian countries suffer from weak mortality statistics  
27 systems. In GLOBOCAN, in countries where mortality series were not available from national vital  
28 registration sources, the predominant means of the estimation of rates were from corresponding national  
29 incidence estimates via modelling, using incidence-to-mortality ratios derived from cancer registries in  
30 neighbouring countries.  
31  
32  
33  
34

35 With over 3 million deaths predicted by 2040 in the absence of additional interventions according  
36 to the finding of this study, it is imperative to emphasize primary prevention as the most cost-effective  
37 strategy of tobacco control. It has been shown that raising the price of cigarettes through increased excise  
38 taxes can bring marked reductions in cigarette consumption<sup>35</sup>. Besides this, developing adaptive tobacco  
39 control strategies that target different subgroups is imperative; anti-tobacco strategies urgently should,  
40 target women living in the EU, in order to halt their rapidly increasing risk of LC, and prevent  
41 unnecessary, premature deaths among future generations of women<sup>36</sup>. Amos and Haglund (2000)  
42 emphasize that building support for female-centered tobacco control programs through partnerships will  
43 be vital to achieve success<sup>28</sup>. Furthermore, Amos (1996) and Mackay and Amos (2003) draw the  
44 attention to the problematic situation of women in developing countries, even in which have low levels  
45 of female cigarette smoking<sup>27</sup>. In these, smoking among girls is already on the rise, women's spending  
46 power is increasing, cigarettes are becoming affordable, they are more exposed to the marketing  
47 strategies of the tobacco companies, cultural constraints are weakening and female-specific quitting  
48 programs are rare<sup>8</sup>. Additionally, a package of measures to suppress tobacco consumption in a given  
49 population, has been recommended through continued efforts to increase the proportion of ex-smokers,  
50 as well as a concentrated focus on younger generations<sup>37</sup>. This could perhaps be achieved by  
51  
52  
53  
54  
55  
56  
57  
58  
59  
60

1  
2  
3 implementing coordinated smoking prevention and control strategies from an early age, in the form of  
4 educational programs in schools. Other measures that could be introduced include community  
5 intervention programs, mass media campaigns and further legislation to ban smoking in public places.  
6 One of the main problems is that young people react very differently to anti-smoking messages than do  
7 adult long-term smokers<sup>37</sup>.  
8  
9  
10

11 In a trial involving high-risk persons, LC mortality was significantly lower among those who  
12 underwent volume computed tomography (CT) screening than among those who underwent no  
13 screening<sup>38</sup>. Another clear advantage was the substantial shift to lower-stage cancers at the time of  
14 diagnosis as well as to more frequent eligibility for curative treatment (mainly surgical)<sup>39</sup>, however  
15 concerns have been raised about the potential for overdiagnosis in lung-cancer screening.  
16  
17  
18  
19

20 In summary, this paper has identified marked geographic variability in the current LC burden  
21 across the world and provided potential scenarios in the changing number of deaths due to this disease  
22 until 2040. There is much we can do to halt the rising LC deaths. Gredner et al., provided, for example  
23 an assessment of future tobacco policy impact based on the relation of current implementation and  
24 tobacco smoking prevalence in countries to illustrate the great potential of comprehensive  
25 implementation of tobacco control policies in Greater-Europe. According to their estimations 1.65  
26 million LC cases could be prevented over a 20-year period with the highest-level implementation of  
27 tobacco control policies<sup>40</sup>.  
28  
29  
30  
31  
32  
33  
34

### 35 **Role of the founding source**

36 This work was supported by the National Laboratories Excellence program (under the National  
37 Tumorbiology Laboratory project (NLP-17)) and the Hungarian Thematic Excellence Programme  
38 (TKP2021-EGA-44).  
39  
40  
41  
42

### 43 **Authors' contribution**

44 AW: literature search, data analysis, writing – original draft; JV: methodology, data collection, figures,  
45 visualisation; ML: visualisation; EM: writing – review & editing; MP: writing – review & editing; HR:  
46 writing – review & editing; DS: writing – review & editing; PN: writing – review & editing, funding  
47 acquisition; IK: writing – review & editing; IS: writing – review & editing; FB: methodology,  
48 conceptualisation, data analysis, writing – original draft  
49  
50  
51  
52  
53

### 54 **Declaration of interests**

55 All authors declare that they have no conflicts of interest.  
56  
57  
58

### 59 **Data sharing**

60

1  
2  
3 The data that support the findings of this study are openly available in the Global Cancer Observatory  
4 (GLOBOCAN) at <https://gco.iarc.fr/>  
5  
6  
7

### 8 **Patient and Public Involvement**

9 Patients or the public WERE NOT involved in the design, or conduct, or reporting, or dissemination  
10 plans of our research.  
11  
12

### 13 **Ethics Approval Statement**

14 This study does not involve human participants and animal subjects.  
15  
16  
17

### 18 **References**

- 19  
20  
21  
22  
23 1 Arnold M, Rutherford MJ, Bardot A, *et al.* Progress in cancer survival, mortality, and incidence in  
24 seven high-income countries 1995-2014 (ICBP SURVMARK-2): a population-based study. *Lancet*  
25 *Oncol* 2019; 20: 1493–505.  
26  
27 2 Cancer today. <http://gco.iarc.fr/today/home> (accessed April 30, 2021).  
28  
29 3 National Center for Chronic Disease Prevention and Health Promotion (US) Office on Smoking  
30 and Health. The Health Consequences of Smoking—50 Years of Progress: A Report of the Surgeon  
31 General. Atlanta (GA): Centers for Disease Control and Prevention (US), 2014  
32 <http://www.ncbi.nlm.nih.gov/books/NBK179276/> (accessed April 14, 2022).  
33  
34 4 Lopez AD, Collishaw NE, Piha T. A descriptive model of the cigarette epidemic in developed  
35 countries. *Tobacco Control* 1994; 3: 242.  
36  
37 5 Bray FI, Weiderpass E. Lung cancer mortality trends in 36 European countries: secular trends and  
38 birth cohort patterns by sex and region 1970-2007. *Int J Cancer* 2010; 126: 1454–66.  
39  
40 6 Miranda-Filho A, Piñeros M, Bray F. The descriptive epidemiology of lung cancer and tobacco  
41 control: a global overview 2018. *Salud Publica Mex* 2019; 61: 219–29.  
42  
43 7 Fidler-Benaoudia MM, Torre LA, Bray F, Ferlay J, Jemal A. Lung cancer incidence in young  
44 women vs. young men: A systematic analysis in 40 countries. *Int J Cancer* 2020; 147: 811–9.  
45  
46 8 Mackay J, Amos A. Women and tobacco. *Respirology* 2003; 8: 123–30.  
47  
48 9 Sansone N, Yong H-H, Li L, Jiang Y, Fong GT. Perceived Acceptability of Female Smoking in  
49 China: Findings from Waves 1 to 3 of the ITC China Survey. *Tob Control* 2015; 24: iv48–54.  
50  
51 10 Ferlay J, Colombet M, Soerjomataram I, *et al.* Cancer statistics for the year 2020: An overview.  
52 *International Journal of Cancer* 2021; 149: 778–89.  
53  
54 11 Sung H, Ferlay J, Siegel RL, *et al.* Global Cancer Statistics 2020: GLOBOCAN Estimates of  
55 Incidence and Mortality Worldwide for 36 Cancers in 185 Countries. *CA: A Cancer Journal for*  
56 *Clinicians* 2021; 71: 209–49.  
57  
58 12 UNSD — Methodology. <https://unstats.un.org/unsd/methodology/m49/> (accessed April 15, 2022).  
59  
60

- 1  
2  
3 13 Ferlay J, Colombet M, Soerjomataram I, *et al.* Estimating the global cancer incidence and mortality  
4 in 2018: GLOBOCAN sources and methods. *Int J Cancer* 2019; 144: 1941–53.  
5  
6 14 Ferlay J, Soerjomataram I, Dikshit R, *et al.* Cancer incidence and mortality worldwide: sources,  
7 methods and major patterns in GLOBOCAN 2012. *Int J Cancer* 2015; 136: E359-386.  
8  
9 15 Ferlay J, Shin H-R, Bray F, Forman D, Mathers C, Parkin DM. Estimates of worldwide burden of  
10 cancer in 2008: GLOBOCAN 2008. *International Journal of Cancer* 2010; 127: 2893–917.  
11  
12 16 Segi M, Kurihara M. Cancer mortality for selected sites in 24 countries (1950-1957). 2 ed. Sendai:  
13 Tohoku University of Medicine, 1960.  
14  
15 17 Doll R, Payne P, Waterhouse J. Cancer Incidence in Five Continents: A Technical Report. New  
16 York: Springer, 1966.  
17  
18 18 Day NE. Cancer Incidence in Five Continents. Cumulative rate and cumulative risk. *IARC Sci Publ*  
19 1992; : 862–4.  
20  
21 19 Human Development Reports | United Nations Development Programme. <https://hdr.undp.org/>  
22 (accessed April 15, 2022).  
23  
24 20 Cancer Tomorrow. <https://gco.iarc.fr/tomorrow/en> (accessed April 15, 2022).  
25  
26 21 Cavelaars AE, Kunst AE, Geurts JJ, *et al.* Educational differences in smoking: international  
27 comparison. *BMJ* 2000; 320: 1102–7.  
28  
29 22 Thun M, Peto R, Boreham J, Lopez AD. Stages of the cigarette epidemic on entering its second  
30 century. *Tobacco Control* 2012; 21: 96–101.  
31  
32 23 Janssen F, Gewily SE, Bardoutsos A. Smoking epidemic in Europe in the 21st century. *Tobacco*  
33 *Control* 2021; 30: 523–9.  
34  
35 24 Wensink M, Alvarez J-A, Rizzi S, Janssen F, Lindahl-Jacobsen R. Progression of the smoking  
36 epidemic in high-income regions and its effects on male-female survival differences: a cohort-by-  
37 age analysis of 17 countries. *BMC Public Health* 2020; 20: 39.  
38  
39 25 Shapiro D. Smoking Tobacco: Irrationality, Addiction, and Paternalism. *Public Affairs Quarterly*  
40 1994; 8: 187–203.  
41  
42 26 Lortet-Tieulent J, Soerjomataram I, Ferlay J, Rutherford M, Weiderpass E, Bray F. International  
43 trends in lung cancer incidence by histological subtype: Adenocarcinoma stabilizing in men but still  
44 increasing in women. *Lung Cancer* 2014; 84: 13–22.  
45  
46 27 Amos A. Women and smoking. *British Medical Bulletin* 1996; 52: 74–89.  
47  
48 28 Amos A, Haglund M. From social taboo to ‘torch of freedom’: the marketing of cigarettes to  
49 women. *Tob Control* 2000; 9: 3–8.  
50  
51 29 Pampel FC. Cigarette Use and the Narrowing Sex Differential in Mortality. *Population and*  
52 *Development Review* 2002; 28: 77–104.  
53  
54 30 Carlson E, Hoffmann R. The State Socialist Mortality Syndrome. *Popul Res Policy Rev* 2011; 30:  
55 355–79.  
56  
57 31 Meslé F, Vallin J. The End of East–West Divergence in European Life Expectancies? An  
58 Introduction to the Special Issue. *Eur J Popul* 2017; 33: 615–27.  
59  
60

- 1  
2  
3 32 Vineis P, Huybrechts I, Millett C, Weiderpass E. Climate change and cancer: converging policies.  
4 *Molecular Oncology* 2021; 15: 764–9.  
5
- 6 33 Malhotra J, Malvezzi M, Negri E, La Vecchia C, Boffetta P. Risk factors for lung cancer  
7 worldwide. *Eur Respir J* 2016; 48: 889–902.  
8
- 9 34 Cohen AJ, Brauer M, Burnett R, *et al.* Estimates and 25-year trends of the global burden of disease  
10 attributable to ambient air pollution: an analysis of data from the Global Burden of Diseases Study  
11 2015. *The Lancet* 2017; 389: 1907–18.  
12
- 13 35 Jha P, Peto R. Global Effects of Smoking, of Quitting, and of Taxing Tobacco. *New England*  
14 *Journal of Medicine* 2014; 370: 60–8.  
15
- 16 36 Bray F, Tyczynski JE, Parkin DM. Going up or coming down? The changing phases of the lung  
17 cancer epidemic from 1967 to 1999 in the 15 European Union countries. *Eur J Cancer* 2004; 40:  
18 96–125.  
19
- 20 37 Tyczynski JE, Bray F, Aareleid T, *et al.* Lung cancer mortality patterns in selected Central, Eastern  
21 and Southern European countries. *International Journal of Cancer* 2004; 109: 598–610.  
22
- 23 38 de Koning HJ, van der Aalst CM, de Jong PA, *et al.* Reduced Lung-Cancer Mortality with Volume  
24 CT Screening in a Randomized Trial. *New England Journal of Medicine* 2020; 382: 503–13.  
25
- 26 39 Yousaf-Khan AU, van der Aalst CM, de Jong PA. Cancer stage shift and treatment shift in the  
27 NELSON lung cancer screening trial: implications for clinicians. *Rotterdam, the Netherlands:*  
28 *Erasmus University* 2018.  
29
- 30 40 Gredner T, Mons U, Niedermaier T, Brenner H, Soerjomataram I. Impact of tobacco control  
31 policies implementation on future lung cancer incidence in Europe: An international, population-  
32 based modeling study. *The Lancet Regional Health - Europe* 2021; 4: 100074.  
33  
34  
35  
36  
37  
38  
39  
40  
41  
42  
43  
44  
45  
46  
47  
48  
49  
50  
51  
52  
53  
54  
55  
56  
57  
58  
59  
60

Figure 1: Lung cancer mortality country rankings worldwide in 2020  
Male

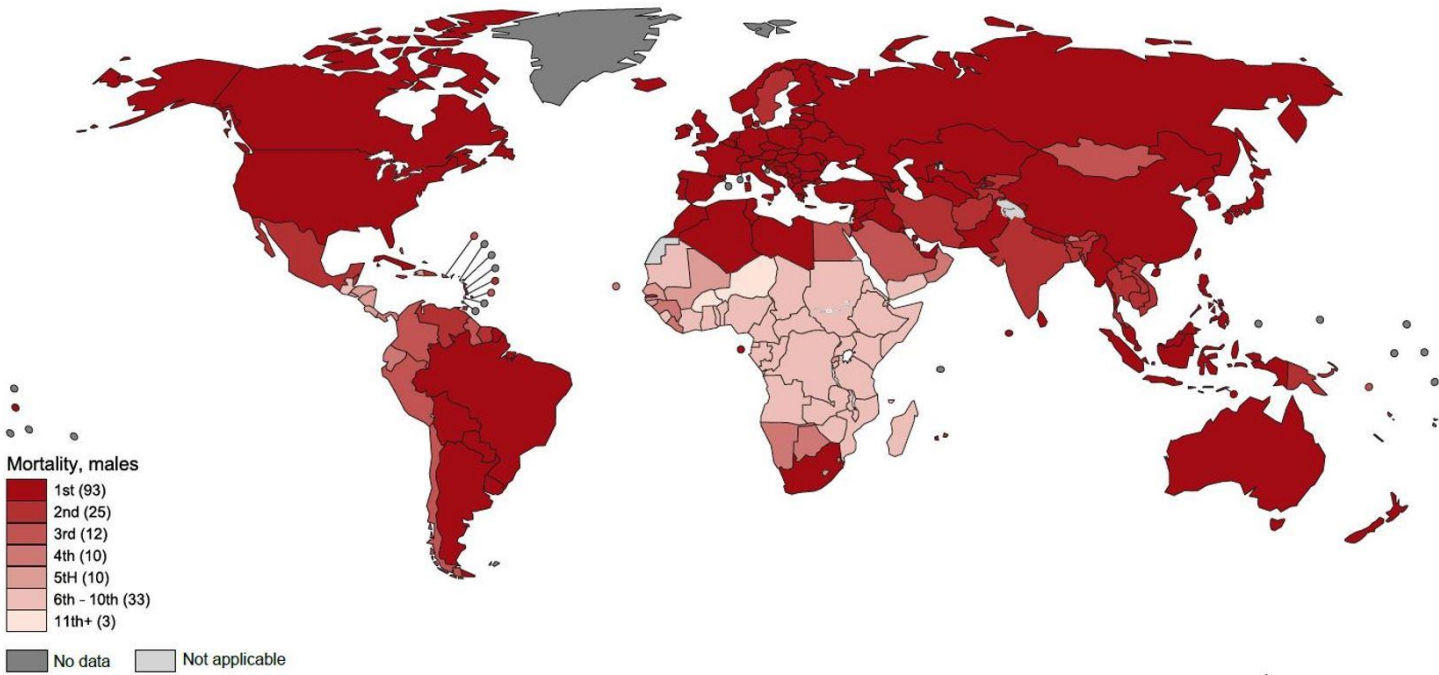

Female

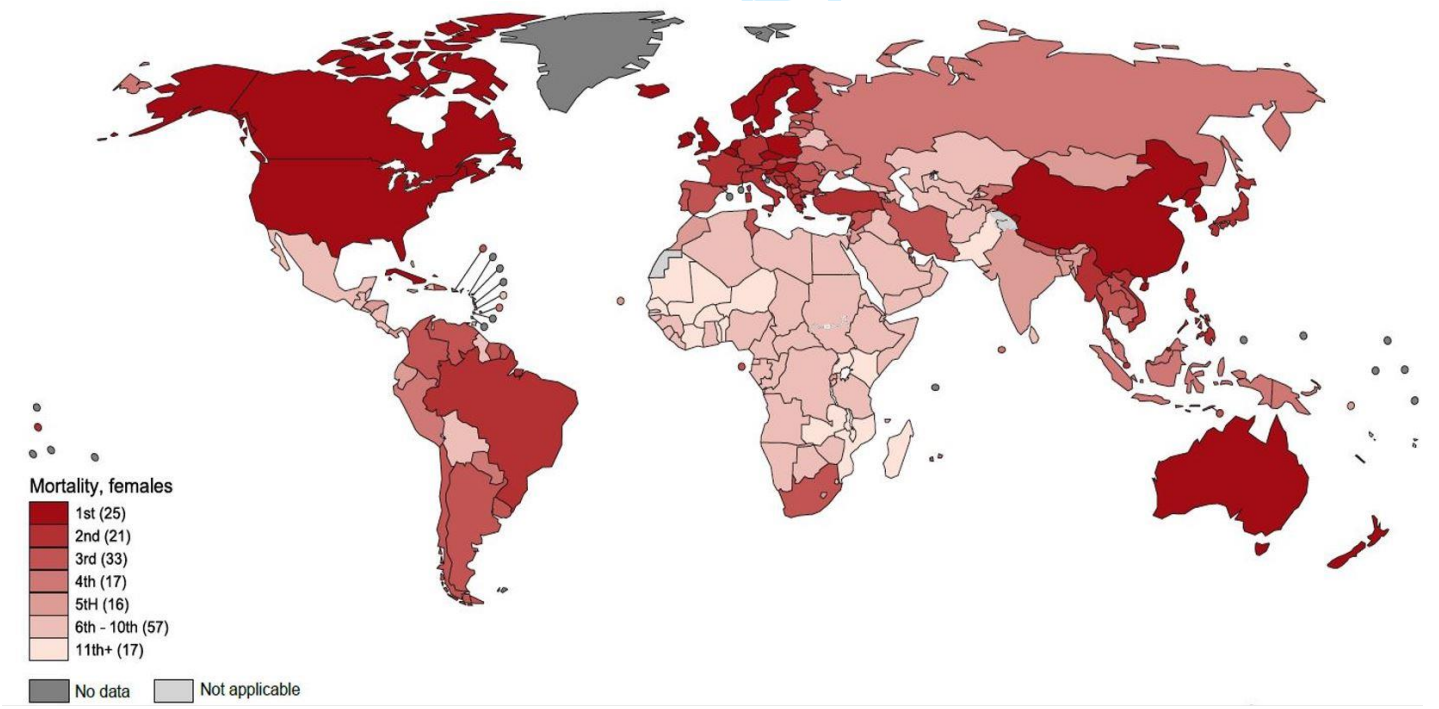

**Figure 2: Lung cancer age-standardized mortality rates per 100,000 by world regions and sex in 2020**

Lung cancer

Age-standardized (W) mortality rate per 100000, males

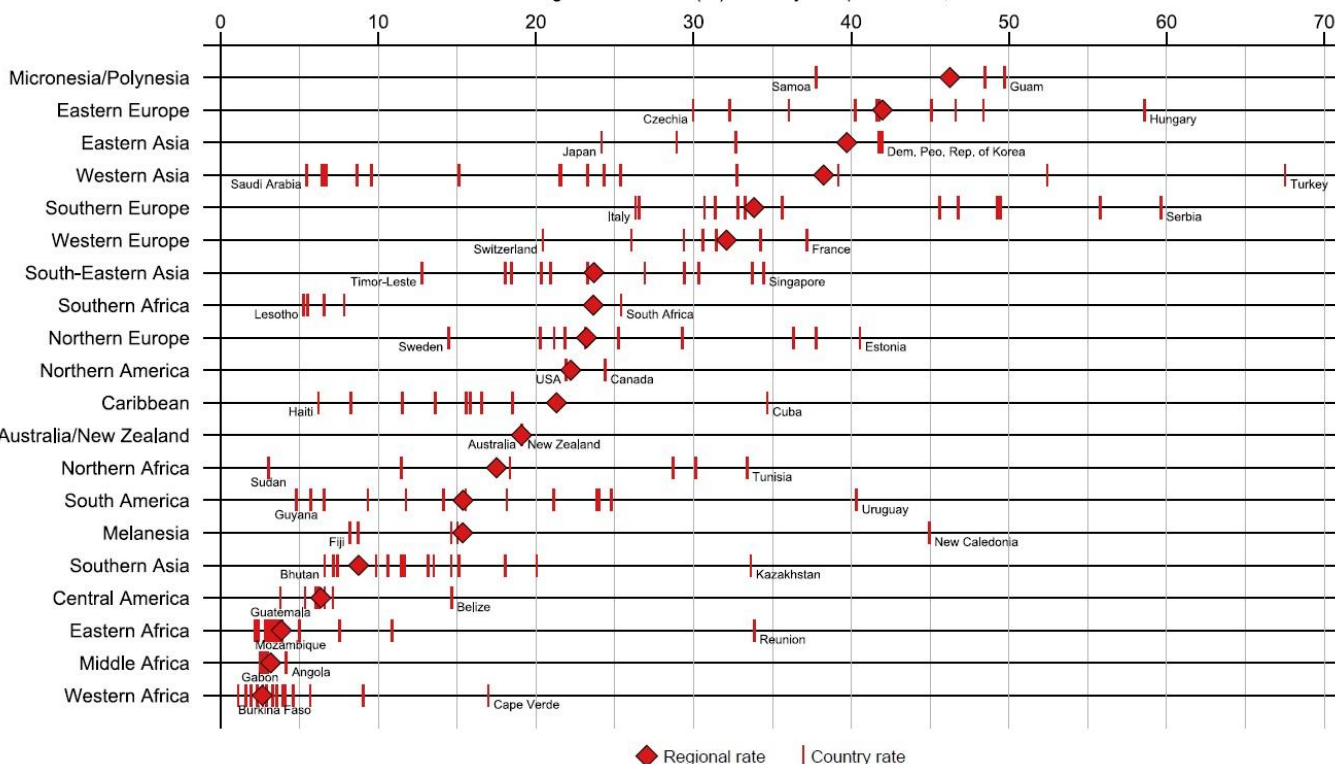

◆ Regional rate | Country rate

Lung cancer

Age-standardized (W) mortality rate per 100000, females

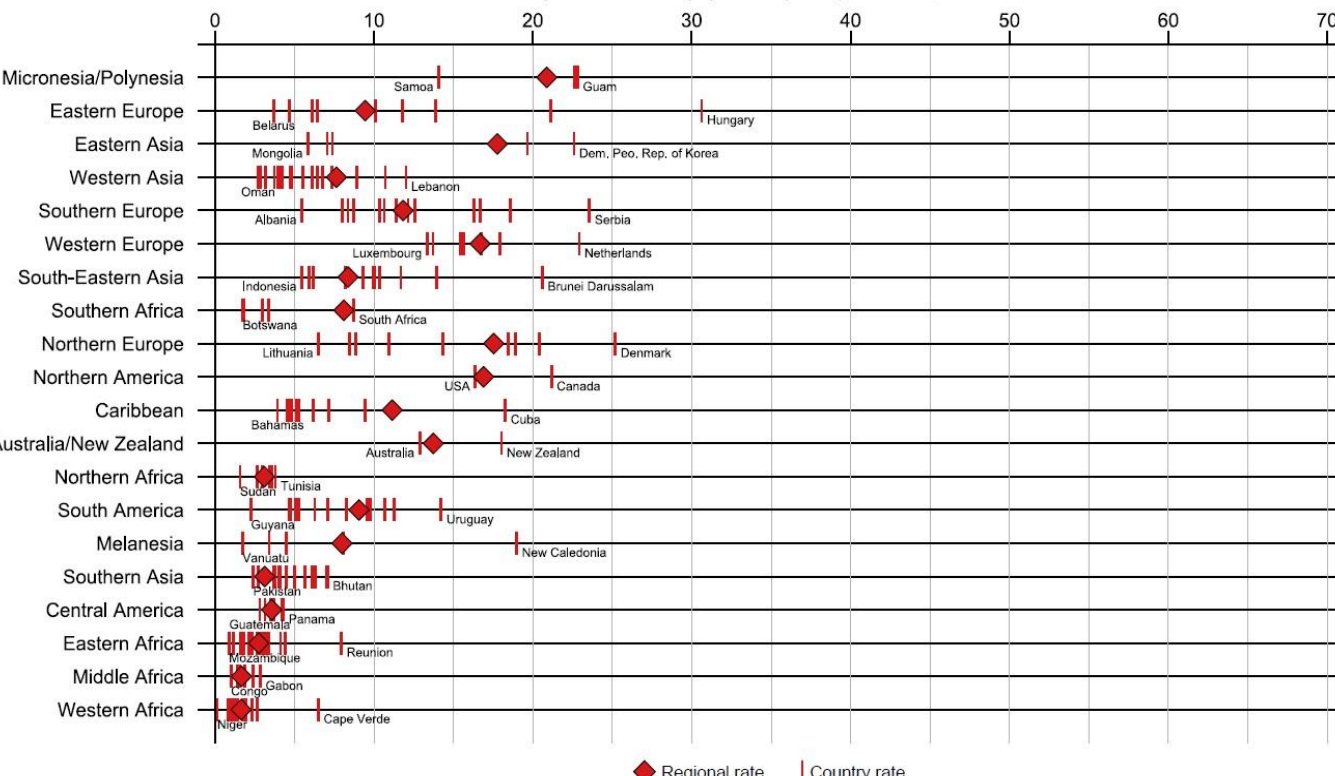

◆ Regional rate | Country rate



**Figure 3: Lung cancer mortality projections worldwide from 2020 to 2040 by sex and the Human Development Index (HDI)**

**Lung cancer mortality by sex**

**A**

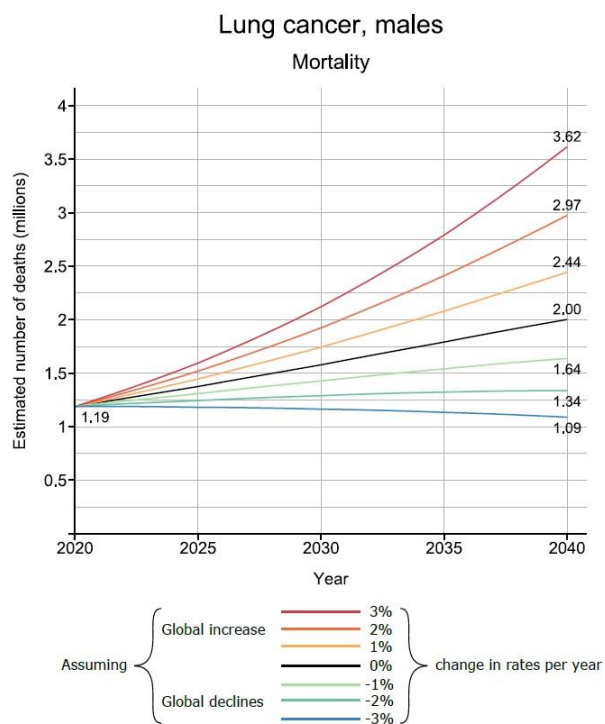

**B**

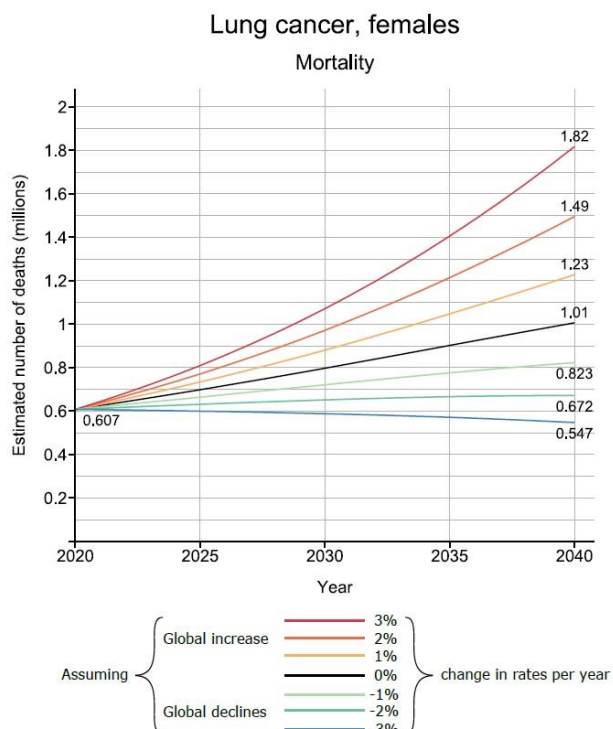

view only

Supplemental material - Appendix

Figure 1: Lung cancer mortality country rankings worldwide in 2020, Male - Female

The boundaries and names shown and the designations used on this map do not imply the expression of any opinion whatsoever on the part of the World Health Organization concerning the legal status of any country, territory, city or area or of its authorities, or concerning the delimitation of its frontiers or boundaries. Dotted and dashed lines on maps represent approximate border lines for which there may not yet be full agreement. Data source: Globocan 2020, Map production: CSU, World Health Organization

Appendices

Lung cancer mortality by sex - very high HDI countries

A

B

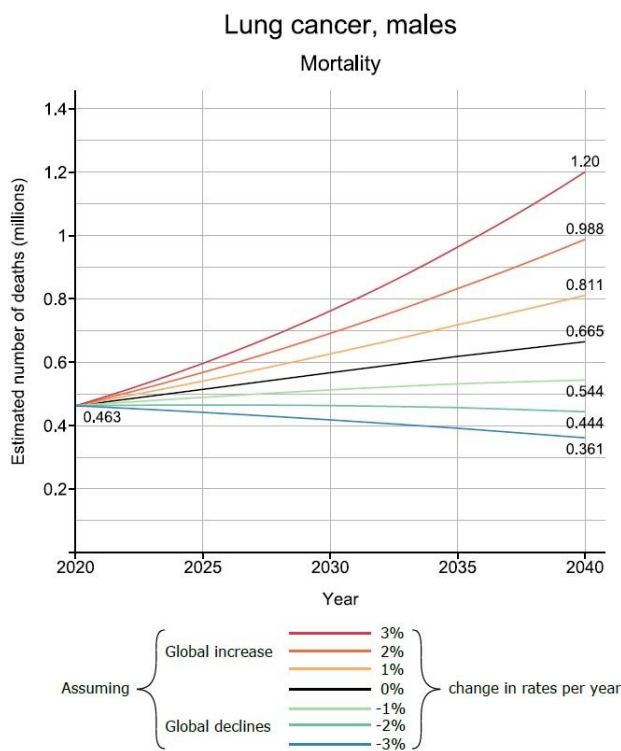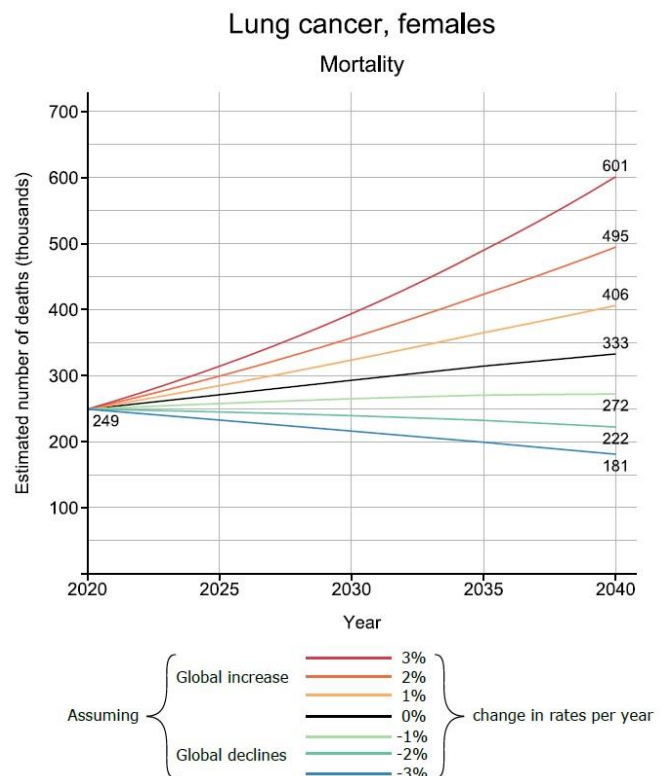

**Lung cancer mortality by sex - high HDI countries**

**C**

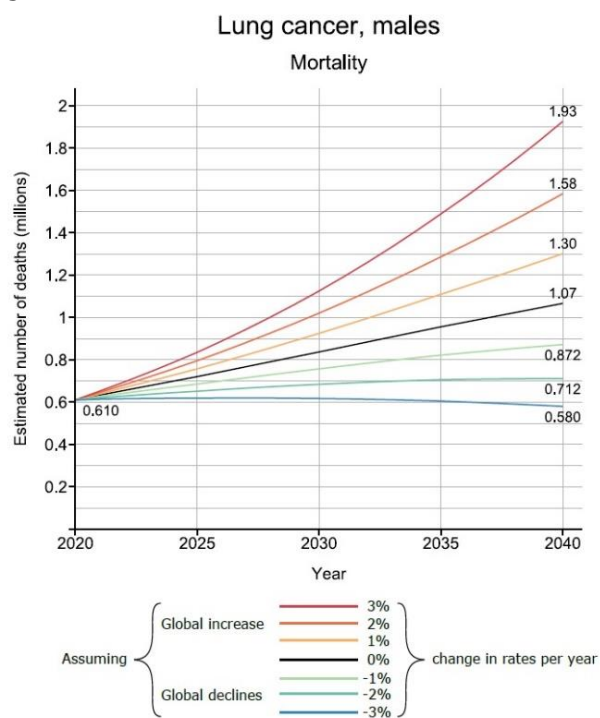

**D**

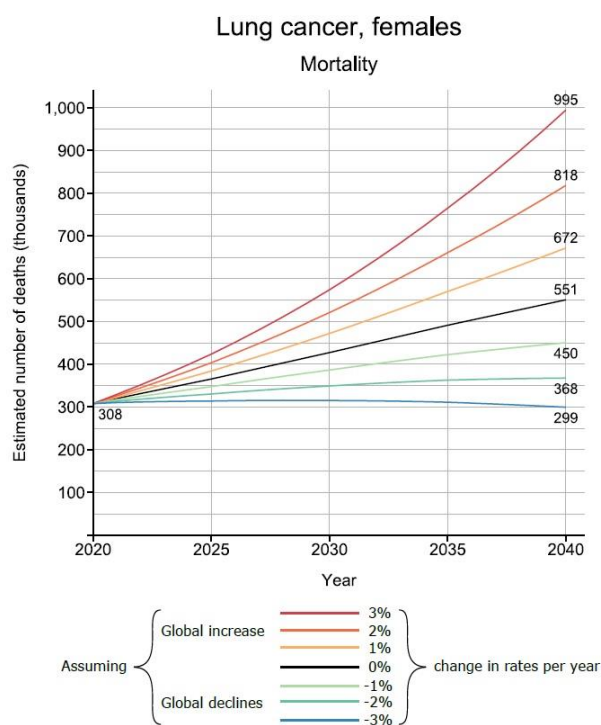

**Lung cancer mortality by sex - medium HDI countries**

**E**

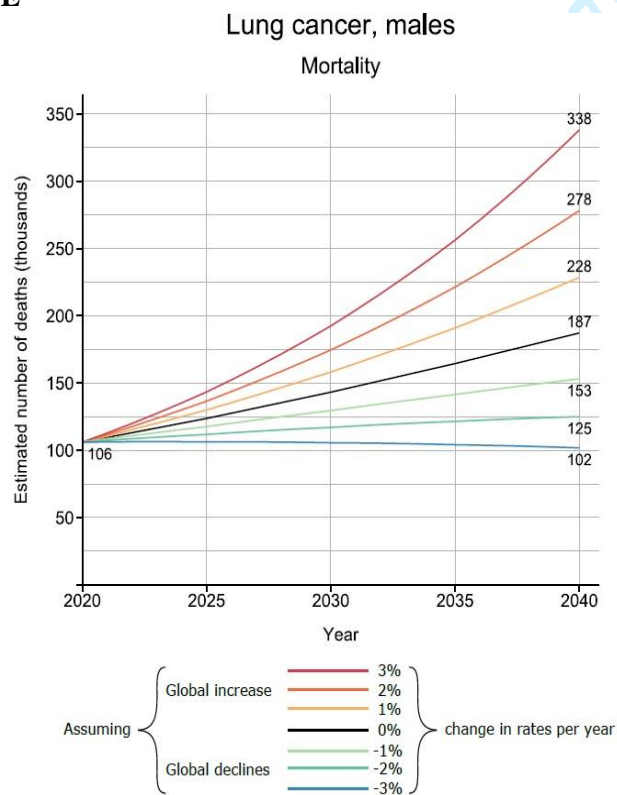

**F**

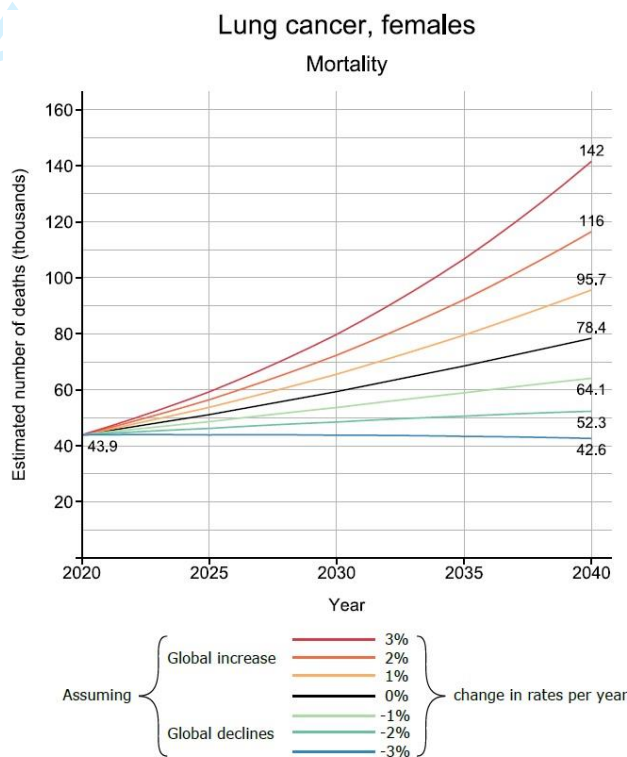

Lung cancer mortality by sex - low HDI countries

G

H

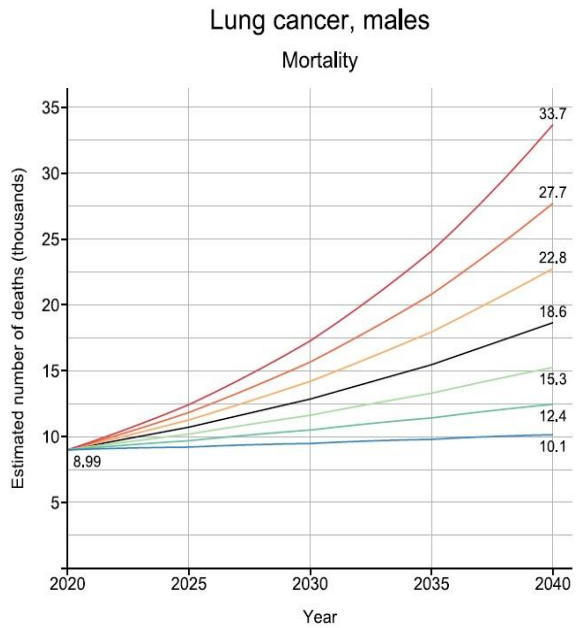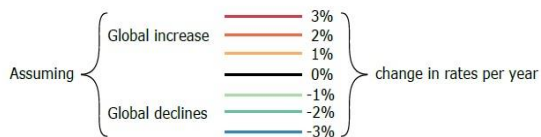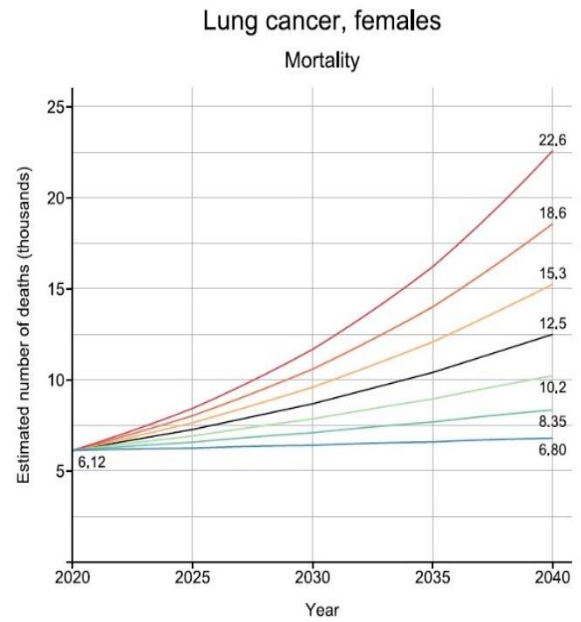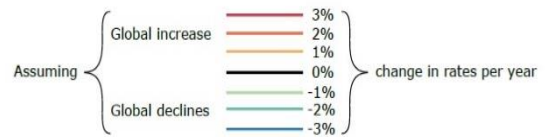

Review only

## STROBE Statement—checklist of items that should be included in reports of observational studies

|                              | Item No                                                                                                                                                                                                                                                                                                   | Recommendation                                                                                                                                                                                                                                                                                                                                                                                                                                                         | Page No |
|------------------------------|-----------------------------------------------------------------------------------------------------------------------------------------------------------------------------------------------------------------------------------------------------------------------------------------------------------|------------------------------------------------------------------------------------------------------------------------------------------------------------------------------------------------------------------------------------------------------------------------------------------------------------------------------------------------------------------------------------------------------------------------------------------------------------------------|---------|
| <b>Title and abstract</b>    | 1                                                                                                                                                                                                                                                                                                         | (a) Indicate the study's design with a commonly used term in the title or the abstract                                                                                                                                                                                                                                                                                                                                                                                 | 1       |
|                              |                                                                                                                                                                                                                                                                                                           | (b) Provide in the abstract an informative and balanced summary of what was done and what was found                                                                                                                                                                                                                                                                                                                                                                    | 2       |
| <b>Introduction</b>          |                                                                                                                                                                                                                                                                                                           |                                                                                                                                                                                                                                                                                                                                                                                                                                                                        |         |
| Background/rationale         | 2                                                                                                                                                                                                                                                                                                         | Explain the scientific background and rationale for the investigation being reported                                                                                                                                                                                                                                                                                                                                                                                   | 4       |
| Objectives                   | 3                                                                                                                                                                                                                                                                                                         | State specific objectives, including any prespecified hypotheses                                                                                                                                                                                                                                                                                                                                                                                                       | 4       |
| <b>Methods</b>               |                                                                                                                                                                                                                                                                                                           |                                                                                                                                                                                                                                                                                                                                                                                                                                                                        |         |
| Study design                 | 4                                                                                                                                                                                                                                                                                                         | Present key elements of study design early in the paper                                                                                                                                                                                                                                                                                                                                                                                                                | 4       |
| Setting                      | 5                                                                                                                                                                                                                                                                                                         | Describe the setting, locations, and relevant dates, including periods of recruitment, exposure, follow-up, and data collection                                                                                                                                                                                                                                                                                                                                        | 4       |
| Participants                 | 6                                                                                                                                                                                                                                                                                                         | (a) <i>Cohort study</i> —Give the eligibility criteria, and the sources and methods of selection of participants. Describe methods of follow-up<br><i>Case-control study</i> —Give the eligibility criteria, and the sources and methods of case ascertainment and control selection. Give the rationale for the choice of cases and controls<br><i>Cross-sectional study</i> —Give the eligibility criteria, and the sources and methods of selection of participants | 4       |
|                              |                                                                                                                                                                                                                                                                                                           | (b) <i>Cohort study</i> —For matched studies, give matching criteria and number of exposed and unexposed<br><i>Case-control study</i> —For matched studies, give matching criteria and the number of controls per case                                                                                                                                                                                                                                                 | 4       |
| Variables                    | 7                                                                                                                                                                                                                                                                                                         | Clearly define all outcomes, exposures, predictors, potential confounders, and effect modifiers. Give diagnostic criteria, if applicable                                                                                                                                                                                                                                                                                                                               | 6       |
| Data sources/<br>measurement | 8*                                                                                                                                                                                                                                                                                                        | For each variable of interest, give sources of data and details of methods of assessment (measurement). Describe comparability of assessment methods if there is more than one group                                                                                                                                                                                                                                                                                   | 4       |
| Bias                         | 9                                                                                                                                                                                                                                                                                                         | Describe any efforts to address potential sources of bias                                                                                                                                                                                                                                                                                                                                                                                                              | 7       |
| Study size                   | 10                                                                                                                                                                                                                                                                                                        | Explain how the study size was arrived at                                                                                                                                                                                                                                                                                                                                                                                                                              |         |
| Quantitative variables       | 11                                                                                                                                                                                                                                                                                                        | Explain how quantitative variables were handled in the analyses. If applicable, describe which groupings were chosen and why                                                                                                                                                                                                                                                                                                                                           | 4       |
| Statistical methods          | 12                                                                                                                                                                                                                                                                                                        | (a) Describe all statistical methods, including those used to control for confounding                                                                                                                                                                                                                                                                                                                                                                                  | 4       |
|                              |                                                                                                                                                                                                                                                                                                           | (b) Describe any methods used to examine subgroups and interactions                                                                                                                                                                                                                                                                                                                                                                                                    | 4       |
|                              | (c) Explain how missing data were addressed                                                                                                                                                                                                                                                               | 7                                                                                                                                                                                                                                                                                                                                                                                                                                                                      |         |
|                              | (d) <i>Cohort study</i> —If applicable, explain how loss to follow-up was addressed<br><i>Case-control study</i> —If applicable, explain how matching of cases and controls was addressed<br><i>Cross-sectional study</i> —If applicable, describe analytical methods taking account of sampling strategy | 4                                                                                                                                                                                                                                                                                                                                                                                                                                                                      |         |
|                              | (e) Describe any sensitivity analyses                                                                                                                                                                                                                                                                     | -                                                                                                                                                                                                                                                                                                                                                                                                                                                                      |         |

Continued on next page

| <b>Results</b>           |     |                                                                                                                                                                                                              |   |
|--------------------------|-----|--------------------------------------------------------------------------------------------------------------------------------------------------------------------------------------------------------------|---|
| Participants             | 13* | (a) Report numbers of individuals at each stage of study—eg numbers potentially eligible, examined for eligibility, confirmed eligible, included in the study, completing follow-up, and analysed            | - |
|                          |     | (b) Give reasons for non-participation at each stage                                                                                                                                                         | 4 |
|                          |     | (c) Consider use of a flow diagram                                                                                                                                                                           |   |
| Descriptive data         | 14* | (a) Give characteristics of study participants (eg demographic, clinical, social) and information on exposures and potential confounders                                                                     | 4 |
|                          |     | (b) Indicate number of participants with missing data for each variable of interest                                                                                                                          | - |
|                          |     | (c) <i>Cohort study</i> —Summarise follow-up time (eg, average and total amount)                                                                                                                             | - |
| Outcome data             | 15* | <i>Cohort study</i> —Report numbers of outcome events or summary measures over time                                                                                                                          | - |
|                          |     | <i>Case-control study</i> —Report numbers in each exposure category, or summary measures of exposure                                                                                                         | - |
|                          |     | <i>Cross-sectional study</i> —Report numbers of outcome events or summary measures                                                                                                                           | 5 |
| Main results             | 16  | (a) Give unadjusted estimates and, if applicable, confounder-adjusted estimates and their precision (eg, 95% confidence interval). Make clear which confounders were adjusted for and why they were included | 5 |
|                          |     | (b) Report category boundaries when continuous variables were categorized                                                                                                                                    | - |
|                          |     | (c) If relevant, consider translating estimates of relative risk into absolute risk for a meaningful time period                                                                                             | - |
| Other analyses           | 17  | Report other analyses done—eg analyses of subgroups and interactions, and sensitivity analyses                                                                                                               | 6 |
| <b>Discussion</b>        |     |                                                                                                                                                                                                              |   |
| Key results              | 18  | Summarise key results with reference to study objectives                                                                                                                                                     | 6 |
| Limitations              | 19  | Discuss limitations of the study, taking into account sources of potential bias or imprecision. Discuss both direction and magnitude of any potential bias                                                   | 7 |
| Interpretation           | 20  | Give a cautious overall interpretation of results considering objectives, limitations, multiplicity of analyses, results from similar studies, and other relevant evidence                                   | 6 |
| Generalisability         | 21  | Discuss the generalisability (external validity) of the study results                                                                                                                                        | 6 |
| <b>Other information</b> |     |                                                                                                                                                                                                              |   |
| Funding                  | 22  | Give the source of funding and the role of the funders for the present study and, if applicable, for the original study on which the present article is based                                                | 8 |

\*Give information separately for cases and controls in case-control studies and, if applicable, for exposed and unexposed groups in cohort and cross-sectional studies.

**Note:** An Explanation and Elaboration article discusses each checklist item and gives methodological background and published examples of transparent reporting. The STROBE checklist is best used in conjunction with this article (freely available on the Web sites of PLoS Medicine at <http://www.plosmedicine.org/>, Annals of Internal Medicine at <http://www.annals.org/>, and Epidemiology at <http://www.epidem.com/>). Information on the STROBE Initiative is available at [www.strobe-statement.org](http://www.strobe-statement.org).

# BMJ Open

## Lung cancer mortality in the wake of the changing smoking epidemic: a descriptive study of the global burden in 2020 and 2040.

|                                 |                                                                                                                                                                                                                                                                                                                                                                                                                                                                                                                                                                                                                                                                                                                                                                                                                                                                                                                                                                                                                                                                                         |
|---------------------------------|-----------------------------------------------------------------------------------------------------------------------------------------------------------------------------------------------------------------------------------------------------------------------------------------------------------------------------------------------------------------------------------------------------------------------------------------------------------------------------------------------------------------------------------------------------------------------------------------------------------------------------------------------------------------------------------------------------------------------------------------------------------------------------------------------------------------------------------------------------------------------------------------------------------------------------------------------------------------------------------------------------------------------------------------------------------------------------------------|
| Journal:                        | <i>BMJ Open</i>                                                                                                                                                                                                                                                                                                                                                                                                                                                                                                                                                                                                                                                                                                                                                                                                                                                                                                                                                                                                                                                                         |
| Manuscript ID                   | bmjopen-2022-065303.R1                                                                                                                                                                                                                                                                                                                                                                                                                                                                                                                                                                                                                                                                                                                                                                                                                                                                                                                                                                                                                                                                  |
| Article Type:                   | Original research                                                                                                                                                                                                                                                                                                                                                                                                                                                                                                                                                                                                                                                                                                                                                                                                                                                                                                                                                                                                                                                                       |
| Date Submitted by the Author:   | 27-Sep-2022                                                                                                                                                                                                                                                                                                                                                                                                                                                                                                                                                                                                                                                                                                                                                                                                                                                                                                                                                                                                                                                                             |
| Complete List of Authors:       | Weber, Andras; International Agency for Research on Cancer, Cancer Surveillance Branch; National Institute of Oncology, Hungarian National Cancer Registry<br>Morgan, Eileen; International Agency for Research on Cancer<br>Vignat, Jerome; International Agency for Research on Cancer<br>Laversanne, Mathieu; International Agency for Research on Cancer, Cancer Surveillance Branch<br>Pizzato, Margherita; International Agency for Research on Cancer; University of Milan, Department of Clinical Sciences and Community Health<br>Rumgay, Harriet; International Agency for Research on Cancer<br>Singh, Deependra; International Agency for Research on Cancer<br>Nagy, Péter; National Institute of Oncology, Department of Molecular Immunology and Toxicology; University of Veterinary Medicine, Department of Anatomy and Histology<br>Kenessey, István; National Institute of Oncology; Semmelweis University, Department of Pathology, Forensic and Insurance Medicine<br>Soerjomataram, Isabelle; WHO<br>Bray, Freddie; Int Agcy Res Canc, Cancer Surveillance Branch |
| <b>Primary Subject Heading</b>: | Epidemiology                                                                                                                                                                                                                                                                                                                                                                                                                                                                                                                                                                                                                                                                                                                                                                                                                                                                                                                                                                                                                                                                            |
| Secondary Subject Heading:      | Epidemiology, Global health, Health policy, Oncology, Public health                                                                                                                                                                                                                                                                                                                                                                                                                                                                                                                                                                                                                                                                                                                                                                                                                                                                                                                                                                                                                     |
| Keywords:                       | Epidemiology < TROPICAL MEDICINE, Health policy < HEALTH SERVICES ADMINISTRATION & MANAGEMENT, PUBLIC HEALTH, EPIDEMIOLOGY, Epidemiology < INFECTIOUS DISEASES                                                                                                                                                                                                                                                                                                                                                                                                                                                                                                                                                                                                                                                                                                                                                                                                                                                                                                                          |
|                                 |                                                                                                                                                                                                                                                                                                                                                                                                                                                                                                                                                                                                                                                                                                                                                                                                                                                                                                                                                                                                                                                                                         |

SCHOLARONE™  
Manuscripts



I, the Submitting Author has the right to grant and does grant on behalf of all authors of the Work (as defined in the below author licence), an exclusive licence and/or a non-exclusive licence for contributions from authors who are: i) UK Crown employees; ii) where BMJ has agreed a CC-BY licence shall apply, and/or iii) in accordance with the terms applicable for US Federal Government officers or employees acting as part of their official duties; on a worldwide, perpetual, irrevocable, royalty-free basis to BMJ Publishing Group Ltd ("BMJ") its licensees and where the relevant Journal is co-owned by BMJ to the co-owners of the Journal, to publish the Work in this journal and any other BMJ products and to exploit all rights, as set out in our [licence](#).

The Submitting Author accepts and understands that any supply made under these terms is made by BMJ to the Submitting Author unless you are acting as an employee on behalf of your employer or a postgraduate student of an affiliated institution which is paying any applicable article publishing charge ("APC") for Open Access articles. Where the Submitting Author wishes to make the Work available on an Open Access basis (and intends to pay the relevant APC), the terms of reuse of such Open Access shall be governed by a Creative Commons licence – details of these licences and which [Creative Commons](#) licence will apply to this Work are set out in our licence referred to above.

Other than as permitted in any relevant BMJ Author's Self Archiving Policies, I confirm this Work has not been accepted for publication elsewhere, is not being considered for publication elsewhere and does not duplicate material already published. I confirm all authors consent to publication of this Work and authorise the granting of this licence.



1  
2  
3 **1 Lung cancer mortality in the wake of the changing smoking epidemic: a descriptive study of the**  
4 **2 global burden in 2020 and 2040.**

6  
7 3 András Wéber PhD<sup>1,2</sup>, Eileen Morgan PhD<sup>1</sup>, Jerome Vignat MSc<sup>1</sup>, Mathieu Laversanne  
8 4 MSc<sup>1</sup>, Margherita Pizzato PhD<sup>1,3</sup>, Harriet Runggay MSc<sup>1</sup>, Deependra Singh PhD<sup>1</sup>, Péter Nagy DSc<sup>4</sup>,  
9 5 István Kenessey MD PhD<sup>2</sup>, Isabelle Soerjomataram PhD<sup>1</sup>, Freddie Bray PhD<sup>1</sup>  
10  
11  
12

13 6  
14  
15  
16 7 <sup>1</sup> Cancer Surveillance Branch, International Agency for Research on Cancer, Lyon, France

17  
18 8 <sup>2</sup> Hungarian National Cancer Registry and National Tumorbiology Laboratory, National Institute of  
19 9 Oncology, Budapest, Hungary

20  
21  
22 10 <sup>3</sup> Department of Clinical Sciences and Community Health, University of Milan, Milan, Italy.

23  
24 11 <sup>4</sup> Department of Molecular Immunology and Toxicology and National Tumorbiology Laboratory,  
25 12 National Institute of Oncology, Budapest, Hungary  
26  
27  
28

29  
30 13

31  
32 14

33  
34  
35 15

36  
37  
38 16

39  
40  
41 17

42  
43  
44 18

45  
46  
47 19

48  
49 20 Corresponding author:

50 21  
51 22 András Wéber

52 23  
53 24 Cancer Surveillance Branch  
54 25 International Agency for Research on Cancer  
55 26 email: andrasvonweber@gmail.com  
56 27

57 28 Hungarian National Cancer Registry  
58 29 National Institute of Oncology  
59  
60

1  
2  
3 31 **Abstract**

4 32  
5 33 *Objectives*

6 34  
7 35 Lung cancer is the leading cause of cancer death in 2020, responsible for almost one in five  
8  
9 36 (18.0%) deaths. This paper provides an overview of the descriptive epidemiology of lung cancer on the  
10  
11 37 basis of national mortality estimates for 2020 from the International Agency for Research on Cancer  
12  
13 38 (IARC), and in the context of recent tobacco control policies.

14 39  
15 40 *Methods*

16 41  
17 42 Age-standardized mortality rates per 100,000 person-years of lung cancer for 185 countries by  
18  
19 43 sex were obtained from the GLOBOCAN 2020 database and stratified by Human Development Index  
20  
21 44 (HDI). Lung cancer deaths were projected to 2040 based on demographic changes alongside scenarios  
22  
23 45 of annually increasing, stable or decreasing rates from the baseline year of 2020.

24 46  
25 47 *Results*

26 48  
27 49 Lung cancer mortality rates exhibited marked variations by geography and sex. Low HDI  
28  
29 50 countries, many of them within sub-Saharan Africa, tend to have low levels of mortality and an upward  
30  
31 51 trend in lung cancer deaths is predicted for both sexes until 2040 according to demographic projections,  
32  
33 52 irrespective of trends in rates. In very high HDI countries, including Europe, Northern America and  
34  
35 53 Australia/New Zealand, there are broadly decreasing trends in men whereas in women, rates are still  
36  
37 54 increasing or reaching a plateau.

38 55  
39 56 *Conclusion*

40 57  
41 58 The current and future burden of lung cancer in a country or region largely depends on the  
42  
43 59 present trajectory of the smoking epidemic in its constituent populations, with distinct gender differences  
44  
45 60 in smoking patterns, both in transitioning and transitioned countries. Further elevations in lung cancer  
46  
47 61 mortality are expected worldwide, raising important social and political questions, especially in low-  
48  
49 62 and middle-income countries.

50 63  
51 64  
52 65 **Keywords:** lung cancer, mortality, projection

53 66  
54 67 **Word count:** 2510  
55  
56  
57  
58  
59  
60

1  
2  
3 68 **Strengths and limitations of this study**

4 69

5 70 *Strengths*

6 71

7 72 This study:

8 73

10 74 • presents a detailed profile of the present LC burden in men and women worldwide according to  
11 75 national levels of human development.

13 76

15 77 • applies a simple projection to estimate the future lung cancer mortality burden in 2040.

17 78

19 79 • discusses the results in the context of key risk factors for lung cancer, particularly the continually  
20 80 evolving smoking epidemic.

22 81

23 82 *Limitations*

24 83

26 84 This study:

27 85

28 86 • is hampered by the limited availability of local cause of death information from national vital  
30 87 registration sources, particularly in transitioning countries.

32 88

33 89

35 90

36 91

38 92

39

40

41

42

43

44

45

46

47

48

49

50

51

52

53

54

55

56

57

58

59

60

## 93 **Introduction**

94 Lung cancer (LC) ranks as the most frequent form of cancer death and premature cancer death  
95 (ages 30-69) with a uniformly low 5-year survival, even in high-income countries [1]. With one-fifth of  
96 the present cancer mortality worldwide due to LC – an estimated 1.8 million deaths in 2020 [2] – the  
97 key determinant remains tobacco consumption. Up to 9 in 10 LC cases are caused by smoking in high-  
98 income settings, while mortality increases with number of cigarettes smoked and smoking duration [3].  
99 Lopez et al. drew attention to the phases of the global smoking epidemic and the subsequent impact of  
100 smoking on LC occurrence by sex [4]; men and women remain in very different phases of the smoking  
101 epidemic, as reflected in disease rates by birth cohort. Recent reports have generally described marked  
102 variations in rates between sexes, with stable or decreasing rates found predominantly among male while  
103 increasing rates among female populations [5,6].

104 An emerging pattern is a higher rate of LC incidence among young females than males across  
105 geographic areas and income levels, that is not fully explained by sex-specific differences in smoking  
106 prevalence [7]. Such temporal patterns forewarn of a higher LC burden in women than men at older ages  
107 in the decades to follow, especially in higher-income settings. Women have been increasingly targeted  
108 in marketing campaigns, particularly in transitioning countries, while social constraints that precluded  
109 women taking up the habit are weakening [8]; still, smoking prevalence among women varies markedly,  
110 with, for example, a small proportion of women in China current smokers, in absolute terms and relative  
111 to men [9].

112 This paper presents a global overview of the descriptive epidemiology of LC in relation to recent  
113 tobacco control policies, using the GLOBOCAN mortality estimates for the year 2020 provided by the  
114 International Agency for Research on Cancer (IARC) [10]. In addition, we provide projections of the  
115 future mortality burden according to different temporal scenarios to the year 2040, estimating the  
116 expected future LC deaths according to levels of Human Development Index (HDI).

117

## 118 **Data Sources and Methods**

119 The number of deaths from, cancers of the lung (ICD-10 C33-34, including trachea and bronchus)  
120 were extracted from IARC's GLOBOCAN 2020 database for 185 countries or territories, by sex and 18  
121 age groups (0-4, 5-9, ..., 80-84, 85 and over) [2,10,11]. Corresponding population data for 2020 were  
122 extracted from the United Nations (UN) website [12]. The data sources and hierarchy of methods used  
123 in compiling the cancer estimates have been described in detail elsewhere [10]. In brief, the  
124 GLOBOCAN estimates are assembled at the national level using the best available sources of cancer  
125 incidence and mortality data within a given country. The methods used to derive the 2020 estimates  
126 corresponding to those used to derived for previous years [13,14,15] where applicable, priority is given

1  
2  
3 127 to short-term predictions and modelled mortality to incidence (M:I) ratios, while validity is dependent  
4 128 on the degree of representativeness and quality of the source information [10].

5  
6 129 We present figures based on the estimated deaths in 2020, as well as two summary measures using  
7  
8 130 direct standardization, namely the age-standardized mortality rate (ASR) per 100,000 person-years  
9  
10 131 based on the 1966 Segi-Doll World standard population [16,17] and the cumulative risk of dying from  
11 132 cancer before the age of 75 expressed as a percentage, assuming the absence of competing causes of  
12  
13 133 death [18]. These measures allow comparisons between populations adjusted for differences in age  
14 134 structures. We also provide a prediction of the future number of LC deaths worldwide for the year 2040,  
15  
16 135 based on demographic projections and scenarios of uniformly increasing (+3%, +2%, +1%), stable (0%)  
17 136 or decreasing (-1%, -2%, -3%) rates annually from the baseline year of 2020. The possible impact of  
18  
19 137 COVID-19 pandemic was not taken into consideration during the calculations.

20  
21 138 The results are presented by country, and aggregated across 20 UN-defined world regions [12]  
22 139 and according to the UN's four-tier HDI in 2020 [19], as a means to assess the cancer burden across four  
23  
24 140 levels of development (low, medium, high and very high HDI). Throughout, we use the terms  
25 141 *transitioning*, *emerging* and *lower HDI* countries/economies as synonyms for nations classified as low  
26  
27 142 or medium HDI, and *transitioned* or *higher HDI* countries/economies for those classified as high or very  
28  
29 143 high HDI.

30 144 The Global Cancer Observatory (GCO, <https://gco.iarc.fr>) includes facilities for the tabulation  
31 145 and graphical visualization of the GLOBOCAN database, including explorations of the current [2] and  
32  
33 146 future [20] burden for 36 cancer types.

34  
35 147 Patient and Public Involvement: Patients or the public were not involved in the design, or  
36 148 conduct, or reporting, or dissemination plans of our research.

37  
38 149

## 39 150 **Results**

### 40 151 *Lung cancer mortality – national rankings 2020*

41  
42 152 Figure 1 presents global maps that indicate LC's position in terms of deaths relative to other  
43  
44 153 common tumours at the national level by sex for the year 2020. In 2020, LC ranks first in terms of cancer  
45  
46 154 death in half, or 93 of the 185 countries included in GLOBOCAN, and either 2<sup>nd</sup> or 3<sup>rd</sup> in 37 countries  
47  
48 155 in men. LC is a major contributor to cancer mortality around the world, including America, greater-  
49  
50 156 Europe, Northern Africa, and across the Asian-Pacific region. There is a somewhat less dominant role  
51  
52 157 at present in South America and Sub-Saharan Africa (but not South Africa). In women, the impact is  
53  
54 158 lesser but still very much in evidence; the disease ranks as the leading form of cancer death in 25  
55  
56 159 countries including those within North America, Northern, Western and Southern-Central Europe,  
57  
58 160 Eastern Asia and Australia/New Zealand. LC mortality ranks as the 2<sup>nd</sup> or 3<sup>rd</sup> leading form of cancer  
59  
60 161 mortality in 54 countries worldwide in women.

1  
2  
3 162 There is at least a 20-fold variation in mortality between the sexes, with rates uniformly higher  
4 163 among men (Figure 2). Male mortality rates are higher in Eastern and Southern Europe (especially in  
5 164 Hungary and Serbia with rates of 60 per 100,000), Eastern Asia (particularly the Democratic People's  
6 165 Republic of Korea) and Polynesia and Micronesia, while rates are lower in Central America, South-  
7 166 Central Asia and most parts of sub-Saharan Africa. The highest female rates are observed in Northern  
8 167 America, Northern and Western Europe, and Australia/New Zealand specifically in Canada, Denmark  
9 168 and the Netherlands, respectively. Relatively low rates are observed in Western-, South-Eastern Asia  
10 169 and across the African continent, other than for South Africa.

#### 16 170 *Lung cancer mortality burden by 2040*

17 171 If the current rates were to remain constant over the next two decades, LC will claim around 2  
18 172 million male deaths in 2040, compared to 1.2 million in 2020 (Figure 3). For women, the corresponding  
19 173 deaths are approximately half of their male counterparts: a predicted increase to 1 million in 2040 from  
20 174 600 000 deaths in 2020. The projection also shows the different scenarios considering the changing rates  
21 175 per year between -3% and +3% based on plausible scenarios of the smoking epidemic in the short-term  
22 176 future; global declines in the number of LC among males but increases for female are perhaps the more  
23 177 realistic scenarios, with national or regional exceptions. Taking this trends-based prediction into  
24 178 account, the predicted number of deaths due to LC for men will likely range between 1.1 and 1.6 million  
25 179 and for women between 1.2 and 1.8 million by 2040. Deaths will markedly increase for both sexes in  
26 180 countries with the lowest HDI, even in the best-case trend scenario (Appendix Figure 1a-h).

34 181

## 36 182 **Discussion**

38 183 This study highlights the present geographic diversity in LC mortality worldwide, by sex and by  
39 184 level of human development. Countries with low HDI tend to have low LC mortality rates but may  
40 185 anticipate a higher mortality burden by 2040. For higher HDI countries, the burden of the disease is  
41 186 higher among men, but future trends suggest an increasingly greater proportion of the cancer burden  
42 187 will be seen among for females. These different scenarios are due to the impact of historic smoking  
43 188 trends and the increasingly widespread application of tobacco control measures in the last decades [21].  
44 189 While there is an expectation that LC mortality will increase in transitioning countries given there is less  
45 190 implementation of effective tobacco control, there is a positivity in the findings of the Global Tobacco  
46 191 Control Report: the number of people now living in countries with at least two anti-tobacco policies in  
47 192 place rose from 3.5 billion in 2018 to 4.4 billion in 2020 – up from 45% of the world's population to  
48 193 56% in two years [22].

56 194 Past smoking histories of nations are a key determinant of the current magnitude of LC in many  
57 195 populations worldwide, as described by the classical model of the global smoking epidemic, first  
58 196 introduced by Lopez et al [4]. In the model, the effect of different smoking patterns was captured by four

1  
2  
3 197 stages in the population, by an earlier adoption of the habit in men compared with women, and by the  
4  
5 198 progressive adoption among lower socioeconomic classes, where the habit continues to be an underlying  
6  
7 199 cause of the marked inequalities seen in different educational groups [23]. Lopez et al. initially applied  
8  
9 200 the hypothesis on just a few developed countries [24], but later was tested on greater geographic scales  
10  
11 201 [25,26]. Nevertheless, as smoking prevalence and subsequent LC rates began to peak and decline among  
12  
13 202 men in many populations over the last decades, a key focus has been the deteriorating public health  
14  
15 203 situation affecting women, where in many settings, rates of LC mortality have continued to rise. This  
16  
17 204 raises several relevant biological, epidemiological and sociological concerns [27], including: the  
18  
19 205 changing distribution of the main histological subtypes of LC over time [28], the extent to which females  
20  
21 206 adopted the habit of smoking and their vulnerability to the tobacco industry [29,30], the impact of such  
22  
23 207 a transition in diminishing gender differences in disease burden worldwide [31] and the effects of  
24  
25 208 different political systems on the health awareness of individuals [32,33]. The impact of these factors is  
26  
27 209 reflected in comparisons of between-country LC mortality rates; for example, the current rate differences  
28  
29 210 in Eastern vs. Northern European countries.

26 211 Smoking is of course not the only risk factor for LC. There is strong evidence of a relation with  
27  
28 212 other factors, including air pollution, climate change [34] and other occupational risk factors such as  
29  
30 213 asbestosis and indoor exposure to cooking fumes etc [35]. The highest exposure to ambient air pollution  
31  
32 214 is the characteristic of mainly countries in transition, where only modest reductions in burden will occur  
33  
34 215 in the most polluted countries unless fine particulate matter (PM 2.5) values are decreased substantially  
35  
36 216 [36].

36 217 Several other studies have aimed to forecast the future lung cancer burden in very high HDI  
37  
38 218 countries e.g., the US [37] and the UK [38] with contradictory findings. While the steeply declining  
39  
40 219 mortality in the US for both sexes until 2040 fits within the framework of the global smoking epidemic,  
41  
42 220 the rising deaths reported in the UK for men and women until 2035 somewhat contradict previous  
43  
44 221 findings. One explanation could be the rapidly ageing population age structure, which can increase the  
45  
46 222 number of these non-standardized figures. Alternatively, these projections do not take into account the  
47  
48 223 changing smoking prevalence in the past as a key determinant of present and future lung cancers. Our  
49  
50 224 GLOBOCAN 2020 forecasts do not consider these either, however, provide possible scenarios on the  
51  
52 225 basis of uniform increases or decreases in rates may help provide a realistic overview of the changing  
53  
54 226 future burden of LC.

52 227 Another limitation of this study is the large variability in the availability and quality of cancer  
53  
54 228 mortality data. Most African and some Asian countries suffer from weak mortality statistics systems. In  
55  
56 229 GLOBOCAN, in countries where mortality series were not available from national vital registration  
57  
58 230 sources, the predominant means of the estimation of rates were from corresponding national incidence  
59  
60

1  
2  
3 231 estimates via modelling, using incidence-to-mortality ratios derived from cancer registries in  
4 232 neighbouring countries.

6  
7 233 With over three million deaths predicted by 2040 in the absence of additional interventions  
8 234 according to the finding of this study, it is imperative to emphasize primary prevention as the most cost-  
9 235 effective strategy of tobacco control. It has been shown that raising the price of cigarettes through  
10 236 increased excise taxes can bring marked reductions in cigarette consumption [39]. Besides this,  
11 237 developing adaptive tobacco control strategies that target different subgroups is imperative; anti-tobacco  
12 238 strategies should urgently target women in settings such as the EU, in order to halt their rapidly  
13 239 increasing risk of LC, and prevent unnecessary, premature deaths among future generations of women  
14 240 [40]. In Sweden, as an example, policies such as those directed at health promotion have been  
15 241 implemented in a gender-specific way with a focus on young and pregnant women. Scotland also has  
16 242 gender-specific programs, such as the Women, Low Income, and Smoking Project [41]. Amos and  
17 243 Haglund (2000) have emphasized that building support for female-centered tobacco control programs  
18 244 through partnerships will be vital to achieve success [30]. Furthermore, Amos (1996) and Mackay and  
19 245 Amos (2003) draw attention to the situation of women in transitioning countries with presently low  
20 246 levels of cigarette smoking among women [29]. In these countries, smoking among girls is already on  
21 247 the rise, women's spending power is increasing, cigarettes are becoming affordable, and women are  
22 248 more exposed to the marketing strategies of tobacco companies, in an environment where cultural  
23 249 constraints are weakening and female-specific quitting programs are rare [8].

24  
25  
26  
27  
28  
29  
30  
31  
32  
33  
34 250 A package of measures to suppress tobacco consumption in a given population has been  
35 251 recommended through continued efforts to increase the proportion of ex-smokers, with a focus on  
36 252 younger generations [42]. This could perhaps be achieved by implementing coordinated smoking  
37 253 prevention and control strategies from an early age, in the form of educational programs in schools.  
38 254 Other measures that could be introduced include community intervention programs, mass media  
39 255 campaigns and further legislation to ban smoking in public places. One of the main problems is that  
40 256 young people react very differently to anti-smoking messages compared to adult long-term smokers  
41 257 [42]. The harm-reducing role of e-cigarettes and aid to smoking cessation has been proposed [43],  
42 258 however their impact on future LC mortality is not yet known [44]. Successful programs have also been  
43 259 implemented in rapidly emerging economies such as Brazil, where a reduction in smoking prevalence  
44 260 were observed after the ratification of the WHO Framework Convention on Tobacco Control (FCTC)  
45 261 in 2005, and the adoption of a national ban on tobacco advertising, a national comprehensive smoke-  
46 262 free policy, large pictorial health warnings on cigarette packages, and continuous increases in taxes and  
47 263 prices of tobacco products [45]. Other factors may influence the future burden of LC such as the potential  
48 264 introduction of screening in high-risk populations. In a recent trial, LC mortality was significantly lower  
49 265 among those who underwent volume computed tomography (CT) screening than those who did not  
50 266 participate [46]. Screened patients benefitted from a substantial shift to lower-stage cancers at the time



1  
2  
3 267 of diagnosis as well as more frequent eligibility for curative treatment (mainly surgery) [47]. However,  
4  
5 268 concerns have been raised about the potential for overdiagnosis in lung-cancer screening.  
6

7 269 In summary, this paper has identified marked geographic variations in the current LC burden  
8  
9 270 worldwide and provided potential scenarios regarding the short-term future LC deaths up until 2040.  
10  
11 271 Gredner et al., have illustrated the great potential of comprehensive implementation of tobacco control  
12  
13 272 policies in Greater-Europe, with over 1.6 million LC cases preventable over a 20-year period through  
14  
15 273 the highest-level implementation of tobacco control policies [48]. There is therefore much we can do to  
16  
17 274 halt the rising deaths from LC – as well as many other forms of cancer and non-communicable diseases  
18  
19 275 –through the successful implementation of tobacco control policies.  
20

21 276

### 22 277 **Disclosure**

23 278 Where authors are identified as personnel of the International Agency for Research on Cancer/World  
24  
25 279 Health Organization, the authors alone are responsible for the views expressed in this article, and they  
26  
27 280 do not necessarily represent the decisions, policy, or views of the International Agency for Research on  
28  
29 281 Cancer/World Health Organization.  
30

31 282

### 32 283 **Role of the funding source**

33 284 PN: This study was supported by the Topic Excellence Program (TKP2020-NKA-26, TKP2021-EGA-  
34  
35 285 44), the National Laboratories Program (National Tumor Biology Laboratory-2022-2.1.1-NL-2022-  
36  
37 286 00010), and Tasks Related to the National Public Health Strategy (IV/4925/2021/ EKF).  
38

39 287

### 40 288 **Authors' contribution**

41 289 AW: literature search, data analysis, writing – original draft; EM: writing – review & editing; JV:  
42  
43 290 methodology, data collection, figures, visualisation; ML: visualisation; MP: writing – review & editing;  
44  
45 291 HR: writing – review & editing; DS: writing – review & editing; PN: writing – review & editing, funding  
46  
47 292 acquisition; IK: writing – review & editing; IS: writing – review & editing; FB: methodology,  
48  
49 293 conceptualisation, data analysis, writing – original draft  
50

51 294

### 52 295 **Declaration of interests**

53 296 All authors declare that they have no conflicts of interest.  
54

55 297

### 56 298 **Data sharing**

57 299 The data that support the findings of this study are available at the Global Cancer Observatory  
58  
59 300 (GLOBOCAN) at <https://gco.iarc.fr/>

60 301 Data are available in a public, open access repository.

## 302 Ethics Approval Statement

303 This study does not involve human participants and animal subjects.

304

## 305 References

- 306 [1] Arnold M, Rutherford MJ, Bardot A, *et al.* Progress in cancer survival, mortality, and incidence in  
307 seven high-income countries 1995–2014 (ICBP SURVMARK-2): a population-based study. *The*  
308 *Lancet Oncology* 2019; **20**: 1493–505.
- 309 [dataset] [2] Ferlay J, Ervik M, Lam F, Colombet M, Mery L, Piñeros M, Znaor A, Soerjomataram I,  
310 Bray F (2020). Global Cancer Observatory: Cancer Today. Lyon, France: International Agency for  
311 Research on Cancer. Available from: <https://gco.iarc.fr/today>, accessed [13 April 2022].
- 312 [3] National Center for Chronic Disease Prevention and Health Promotion (US) Office on Smoking  
313 and Health. The Health Consequences of Smoking—50 Years of Progress: A Report of the Surgeon  
314 General. Atlanta (GA): Centers for Disease Control and Prevention (US), 2014  
315 <http://www.ncbi.nlm.nih.gov/books/NBK179276/> (accessed April 14, 2022).
- 316 [4] Lopez AD, Collishaw NE, Piha T. A descriptive model of the cigarette epidemic in developed  
317 countries. *Tobacco Control* 1994; **3**: 242–7.
- 318 [5] Bray FI, Weiderpass E. Lung cancer mortality trends in 36 European countries: secular trends and  
319 birth cohort patterns by sex and region 1970–2007. *Int J Cancer* 2010; **126**: 1454–66.
- 320 [6] Miranda-Filho A, Piñeros M, Bray F. The descriptive epidemiology of lung cancer and tobacco  
321 control: a global overview 2018. *Salud Publica Mex* 2019; **61**: 219–29.
- 322 [7] Fidler-Benaoudia MM, Torre LA, Bray F, Ferlay J, Jemal A. Lung cancer incidence in young  
323 women vs. young men: A systematic analysis in 40 countries. *International Journal of Cancer* 2020;  
324 **147**: 811–9.
- 325 [8] Mackay J, Amos A. Women and tobacco. *Respirology* 2003; **8**: 123–30.
- 326 [9] Sansone N, Yong H-H, Li L, Jiang Y, Fong GT. Perceived acceptability of female smoking in  
327 China: findings from waves 1 to 3 of the ITC China Survey. *Tob Control* 2015; : tobaccocontrol-2015-  
328 052380.
- 329 [10] Ferlay J, Colombet M, Soerjomataram I, *et al.* Cancer statistics for the year 2020: An overview.  
330 *International Journal of Cancer* 2021; **149**: 778–89.
- 331 [11] Sung H, Ferlay J, Siegel RL, *et al.* Global Cancer Statistics 2020: GLOBOCAN Estimates of  
332 Incidence and Mortality Worldwide for 36 Cancers in 185 Countries. *CA Cancer J Clin* 2021; **71**:  
333 209–49.
- 334 [12] UNSD — Methodology. <https://unstats.un.org/unsd/methodology/m49/> (accessed April 15,  
335 2022).
- 336 [13] Ferlay J, Colombet M, Soerjomataram I, *et al.* Estimating the global cancer incidence and  
337 mortality in 2018: GLOBOCAN sources and methods. *Int J Cancer* 2019; **144**: 1941–53.
- 338 [14] Ferlay J, Soerjomataram I, Dikshit R, *et al.* Cancer incidence and mortality worldwide: sources,  
339 methods and major patterns in GLOBOCAN 2012. *Int J Cancer* 2015; **136**: E359–386.

- 1  
2  
3 340 [15] Ferlay J, Shin H-R, Bray F, Forman D, Mathers C, Parkin DM. Estimates of worldwide burden of  
4 341 cancer in 2008: GLOBOCAN 2008. *International Journal of Cancer* 2010; **127**: 2893–917.
- 5  
6 342 [16] Cancer Mortality for Selected Sites in 24 Countries (1950–57) – ScienceOpen.  
7 343 <https://www.scienceopen.com/document?vid=d36053cb-ebfe-4b4c-a7ca-05447aa3cd19> (accessed  
8 344 April 15, 2022).
- 9  
10 345 [17] Schneiderman MA. Cancer Incidence in Five Continents: A Technical Report: Richard Doll,  
11 346 Peter Payne, and John Waterhouse (eds.). New York: Springer-Verlag, 1966. 244 pp. \$9.50. *Cancer*  
12 347 *Research* 1968; **28**: 804.
- 13  
14 348 [18] Day NE. Cancer Incidence in Five Continents. Cumulative rate and cumulative risk. IARC Sci  
15 349 Publ 1992; 862–4.
- 16  
17 350 [19] Human Development Reports | United Nations Development Programme. <https://hdr.undp.org/>  
18 351 (accessed April 15, 2022).
- 19  
20 352 [dataset] [20] Ferlay J, Laversanne M, Ervik M, Lam F, Colombet M, Mery L, Piñeros M, Znaor A,  
21 353 Soerjomataram I, Bray F (2020). Global Cancer Observatory: Cancer Tomorrow. Lyon, France:  
22 354 International Agency for Research on Cancer. Available from: <https://gco.iarc.fr/tomorrow>, accessed  
23 355 [15 April 2022].
- 24  
25 356 [21] Tobacco Atlas. 2022; published online Feb 25. <https://tobaccoatlas.org/> (accessed Sept 9, 2022).
- 26  
27 357 [22] Global tobacco report 2021. [https://www.who.int/teams/health-promotion/tobacco-control/global-](https://www.who.int/teams/health-promotion/tobacco-control/global-tobacco-report-2021)  
28 358 [tobacco-report-2021](https://www.who.int/teams/health-promotion/tobacco-control/global-tobacco-report-2021) (accessed Sept 22, 2022).
- 29  
30 359 [23] Cavelaars AE, Kunst AE, Geurts JJ, *et al*. Educational differences in smoking: international  
31 360 comparison. *BMJ* 2000; **320**: 1102–7.
- 32  
33 361 [24] Thun M, Peto R, Boreham J, Lopez AD. Stages of the cigarette epidemic on entering its second  
34 362 century. *Tobacco Control* 2012; **21**: 96–101.
- 35  
36 363 [25] Janssen F, Gewily SE, Bardoutsos A. Smoking epidemic in Europe in the 21st century. *Tobacco*  
37 364 *Control* 2021; **30**: 523–9.
- 38  
39 365 [26] Wensink M, Alvarez J-A, Rizzi S, Janssen F, Lindahl-Jacobsen R. Progression of the smoking  
40 366 epidemic in high-income regions and its effects on male-female survival differences: a cohort-by-age  
41 367 analysis of 17 countries. *BMC Public Health* 2020; **20**: 39.
- 42  
43 368 [27] Shapiro D. Smoking Tobacco: Irrationality, Addiction, and Paternalism. *Public Affairs Quarterly*  
44 369 1994; **8**: 187–203.
- 45  
46 370 [28] Lortet-Tieulent J, Soerjomataram I, Ferlay J, Rutherford M, Weiderpass E, Bray F. International  
47 371 trends in lung cancer incidence by histological subtype: adenocarcinoma stabilizing in men but still  
48 372 increasing in women. *Lung Cancer* 2014; **84**: 13–22.
- 49  
50 373 [29] Amos A. Women and smoking. *British Medical Bulletin* 1996; **52**: 74–89.
- 51  
52 374 [30] Amos A. From social taboo to ‘torch of freedom’: the marketing of cigarettes to women. *Tobacco*  
53 375 *Control* 2000; **9**: 3–8.
- 54  
55 376 [31] Pampel FC. Cigarette Use and the Narrowing Sex Differential in Mortality. *Population and*  
56 377 *Development Review* 2002; **28**: 77–104.
- 57  
58  
59  
60

- 1  
2  
3 378 [32] Carlson E, Hoffmann R. The State Socialist Mortality Syndrome. *Population Research and*  
4 379 *Policy Review* 2011; **30**: 355–79.
- 5  
6 380 [33] Meslé F, Vallin J. The End of East–West Divergence in European Life Expectancies? An  
7 381 Introduction to the Special Issue. *European Journal of Population* 2017; **33**: 615–27.
- 8  
9 382 [34] Vineis P, Huybrechts I, Millett C, Weiderpass E. Climate change and cancer: converging policies.  
10 383 *Molecular Oncology* 2021; **15**: 764–9.
- 11  
12 384 [35] Malhotra J, Malvezzi M, Negri E, La Vecchia C, Boffetta P. Risk factors for lung cancer  
13 385 worldwide. *Eur Respir J* 2016; **48**: 889–902.
- 14  
15 386 [36] Cohen AJ, Brauer M, Burnett R, *et al*. Estimates and 25-year trends of the global burden of  
16 387 disease attributable to ambient air pollution: an analysis of data from the Global Burden of Diseases  
17 388 Study 2015. *The Lancet* 2017; **389**: 1907–18.
- 18  
19 389 [37] Rahib L, Wehner MR, Matrisian LM, Nead KT. Estimated Projection of US Cancer Incidence  
20 390 and Death to 2040. ; : 14.
- 21  
22 391 [38] Smittenaar CR, Petersen KA, Stewart K, Moitt N. Cancer incidence and mortality projections in  
23 392 the UK until 2035. *Br J Cancer* 2016; **115**: 1147–55.
- 24  
25 393 [39] Jha P, Peto R. Global Effects of Smoking, of Quitting, and of Taxing Tobacco. *New England*  
26 394 *Journal of Medicine* 2014; **370**: 60–8.
- 27  
28 395 [40] Bray F, Tyczynski JE, Parkin DM. Going up or coming down? The changing phases of the lung  
29 396 cancer epidemic from 1967 to 1999 in the 15 European Union countries. *Eur J Cancer* 2004; **40**: 96–  
30 397 125.
- 31  
32 398 [41] Jonathan Samet, Soon-Young Yoon. Women and the tobacco epidemic. Challenges for the 21st  
33 399 century. The World Health Organization in collaboration with the Institute for Global Tobacco Control  
34 400 Johns Hopkins School of Public Health. 2001.
- 35  
36 401 [42] Tyczynski JE, Bray F, Aareleid T, *et al*. Lung cancer mortality patterns in selected Central,  
37 402 Eastern and Southern European countries. *Int J Cancer* 2004; **109**: 598–610.
- 38  
39 403 [43] Notley C, Ward E, Dawkins L, Holland R. The unique contribution of e-cigarettes for tobacco  
40 404 harm reduction in supporting smoking relapse prevention. *Harm Reduction Journal* 2018; **15**: 31.
- 41  
42 405 [44] Marques P, Piqueras L, Sanz M-J. An updated overview of e-cigarette impact on human health.  
43 406 *Respiratory Research* 2021; **22**: 151.
- 44  
45 407 [45] Dai X, Gakidou E, Lopez AD. Evolution of the global smoking epidemic over the past half  
46 408 century: strengthening the evidence base for policy action. *Tob Control* 2022; **31**: 129–37.
- 47  
48 409 [46] de Koning HJ, van der Aalst CM, de Jong PA, *et al*. Reduced Lung-Cancer Mortality with  
49 410 Volume CT Screening in a Randomized Trial. *N Engl J Med* 2020; **382**: 503–13.
- 50  
51 411 [47] Yousaf-Khan U, van der Aalst C, de Jong PA, *et al*. Final screening round of the NELSON lung  
52 412 cancer screening trial: the effect of a 2.5-year screening interval. *Thorax* 2017; **72**: 48–56.
- 53  
54 413 [48] Gredner T, Mons U, Niedermaier T, Brenner H, Soerjomataram I. Impact of tobacco control  
55 414 policies implementation on future lung cancer incidence in Europe: An international, population-based  
56 415 modeling study. *The Lancet Regional Health - Europe* 2021; **4**: 100074.
- 57  
58  
59  
60 416

1  
2  
3 417 Figures  
4

5 418 Figure 1: Lung cancer mortality compared with mortality from other causes of malignant neoplasms,  
6 419 2020, Male-Female  
7

8 420 Figure 2: Lung cancer age-standardized mortality rates per 100,000 by world regions and sex in 2020,  
9 421 Male-Female  
10

11 422 Figure 3: Lung cancer mortality projections worldwide from 2020 to 2040 by sex and the Human  
12 423 Development Index (HDI)  
13  
14  
15  
16  
17  
18  
19  
20  
21  
22  
23  
24  
25  
26  
27  
28  
29  
30  
31  
32  
33  
34  
35  
36  
37  
38  
39  
40  
41  
42  
43  
44  
45  
46  
47  
48  
49  
50  
51  
52  
53  
54  
55  
56  
57  
58  
59  
60

**Figure 1: Lung cancer mortality compared with mortality from other causes of malignant neoplasms, 2020**  
**Male**

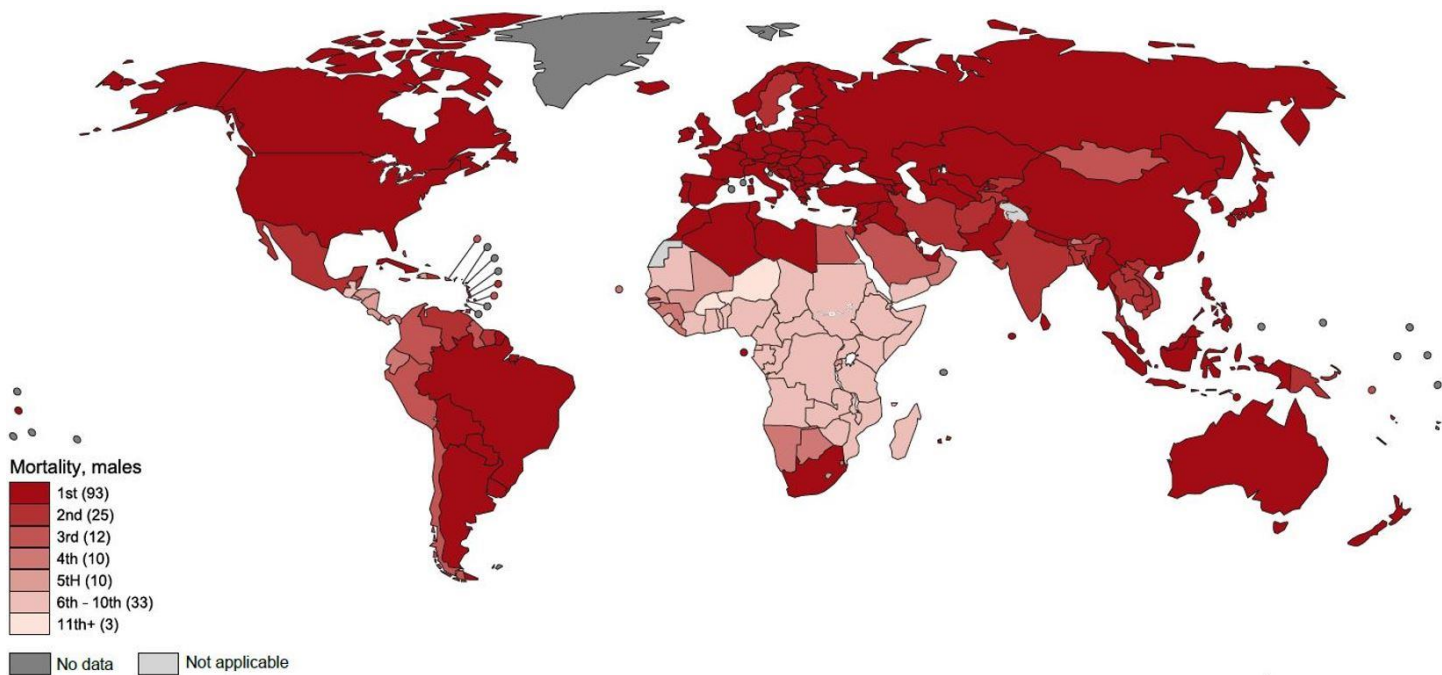

**Female**

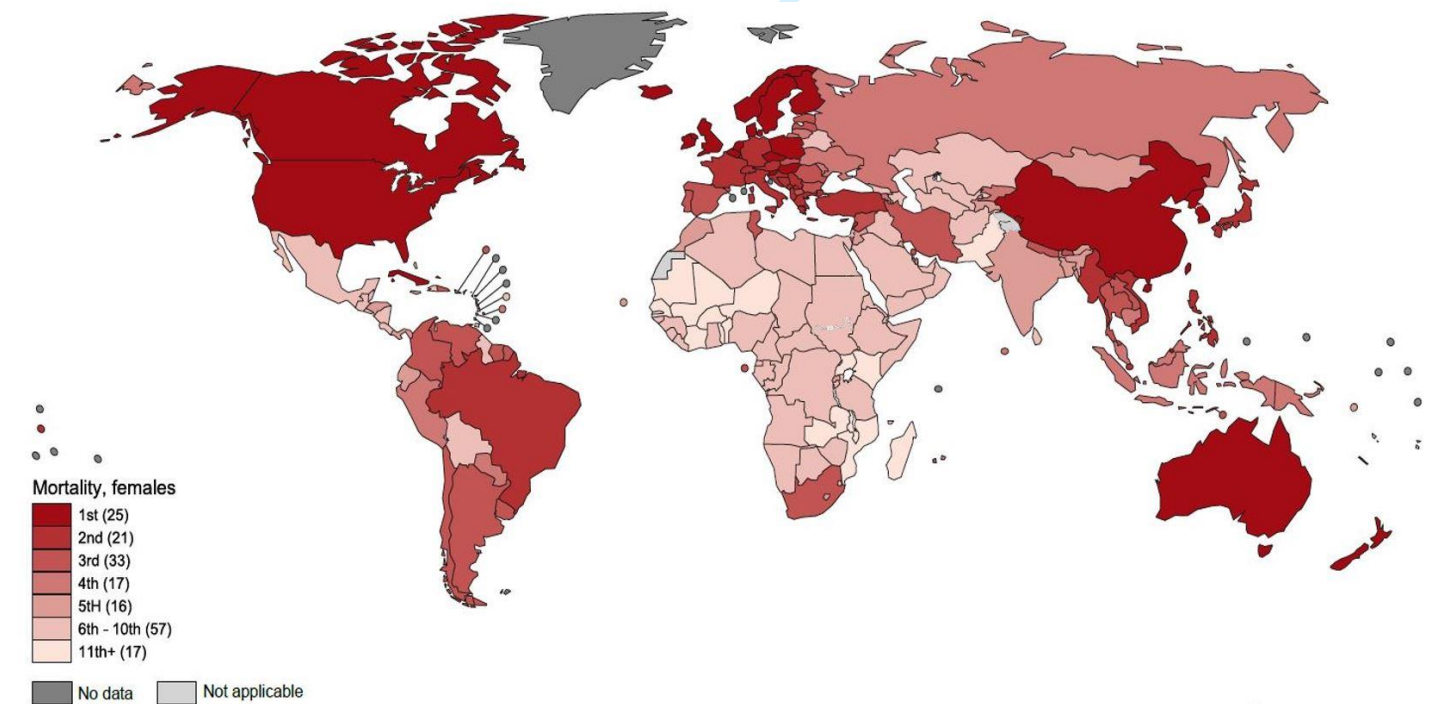

**Figure 2: Lung cancer age-standardized mortality rates per 100,000 by world regions and sex in 2020**

Lung cancer

Age-standardized (W) mortality rate per 100000, males

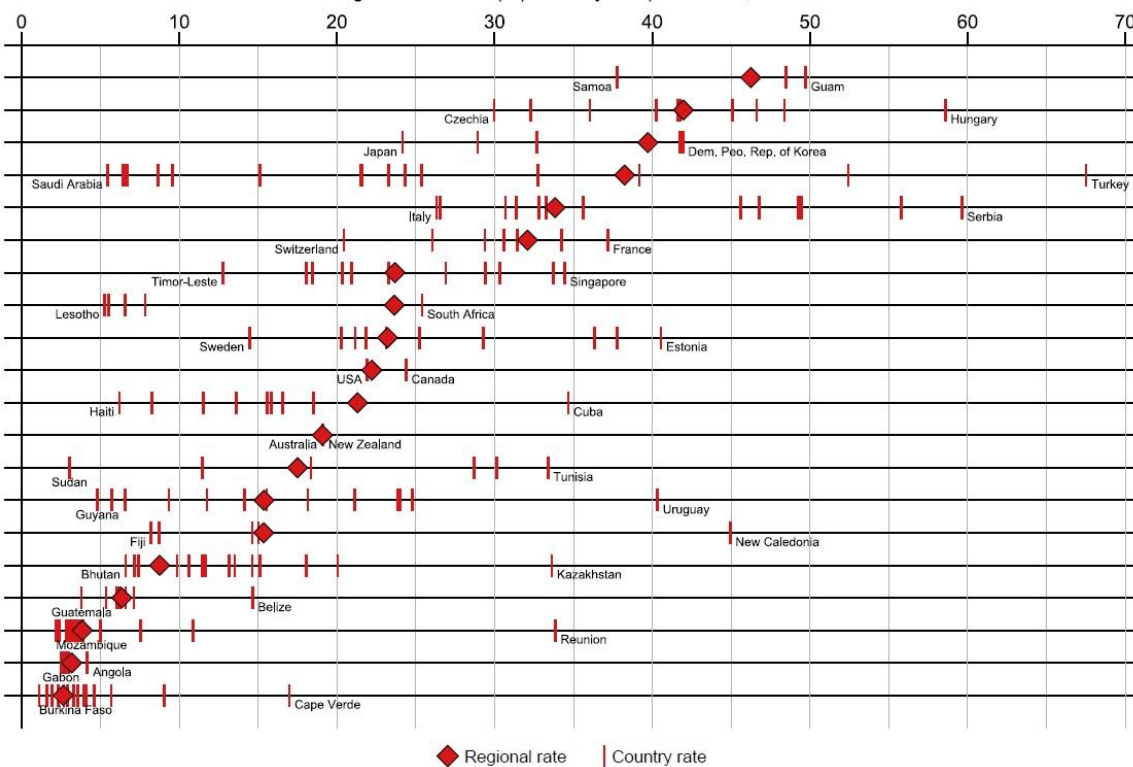

◆ Regional rate | Country rate

Lung cancer

Age-standardized (W) mortality rate per 100000, females

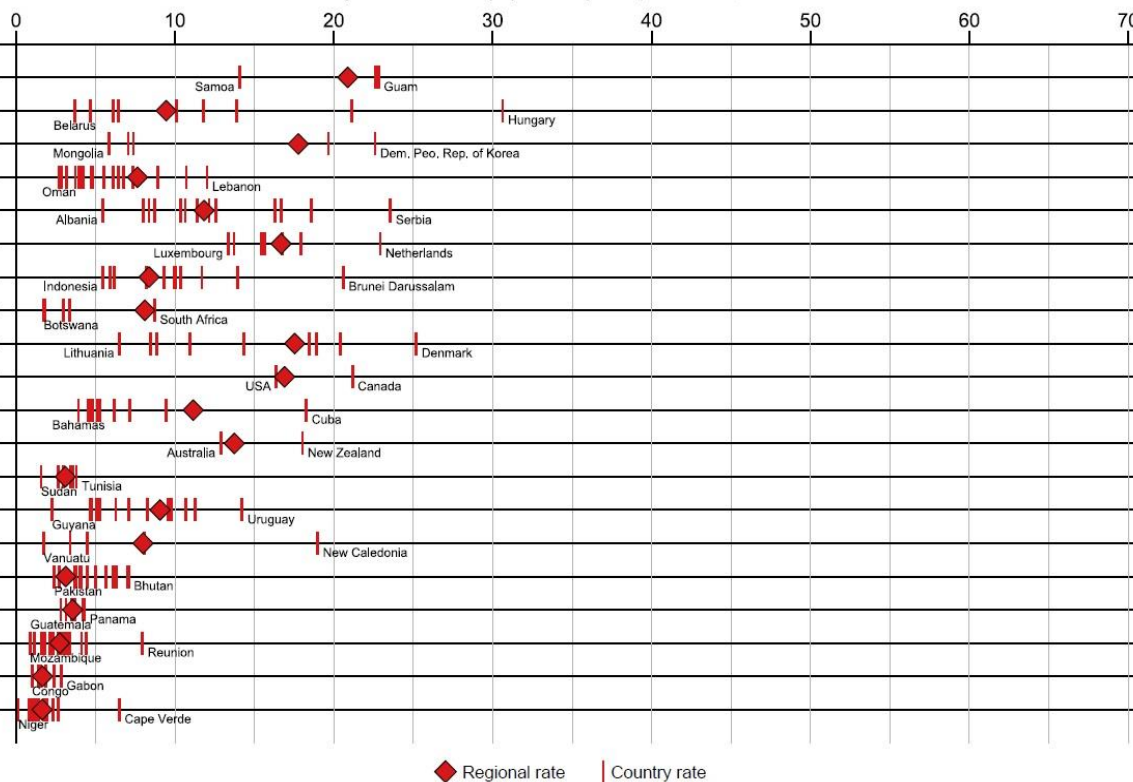

◆ Regional rate | Country rate

**Figure 3: Lung cancer mortality projections worldwide from 2020 to 2040 by sex and the Human Development Index (HDI)**

**Lung cancer mortality by sex**

**A**

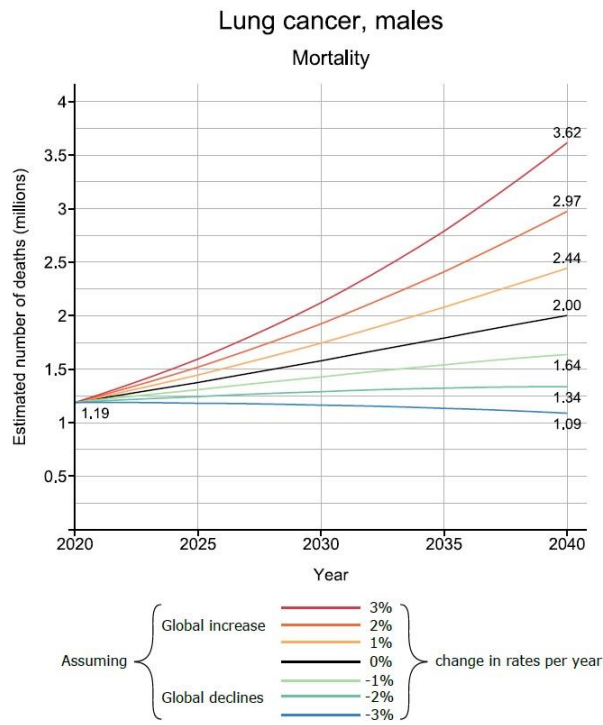

**B**

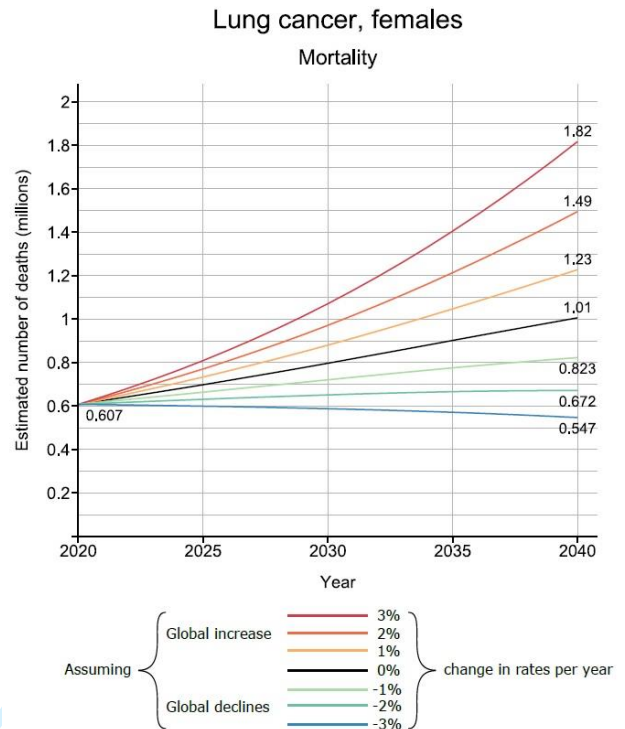

view only



Supplemental material - Appendix

**Figure 1: Lung cancer mortality compared with mortality from other causes of malignant neoplasms, 2020, Male - Female**

The boundaries and names shown and the designations used on this map do not imply the expression of any opinion whatsoever on the part of the World Health Organization concerning the legal status of any country, territory, city or area or of its authorities, or concerning the delimitation of its frontiers or boundaries. Dotted and dashed lines on maps represent approximate border lines for which there may not yet be full agreement.

Data source: Globocan 2020, Map production: CSU, World Health Organization

Ferlay J, Ervik M, Lam F, Colombet M, Mery L, Piñeros M, Znaor A, Soerjomataram I, Bray F (2020). Global Cancer Observatory: Cancer Today. Lyon, France: International Agency for Research on Cancer. Available from: <https://gco.iarc.fr/today>, accessed [13 April 2022].

Appendices

Lung cancer mortality by sex - very high HDI countries

A

B

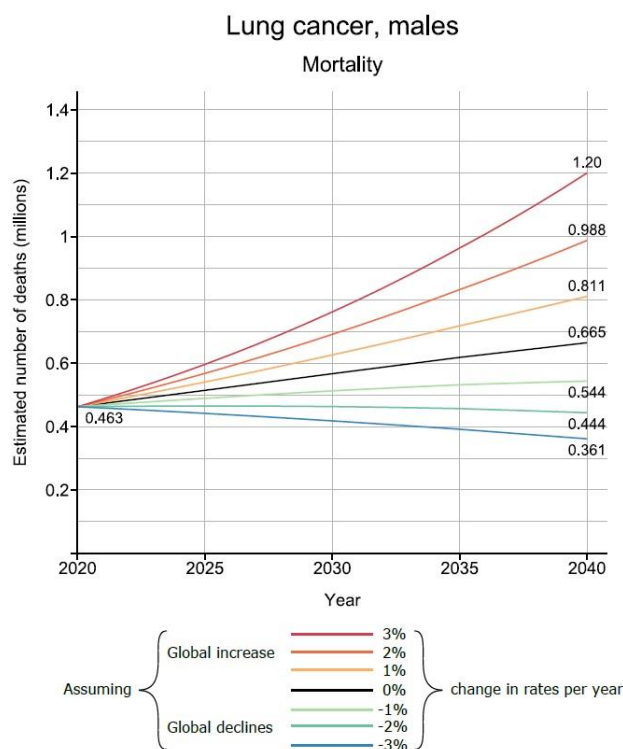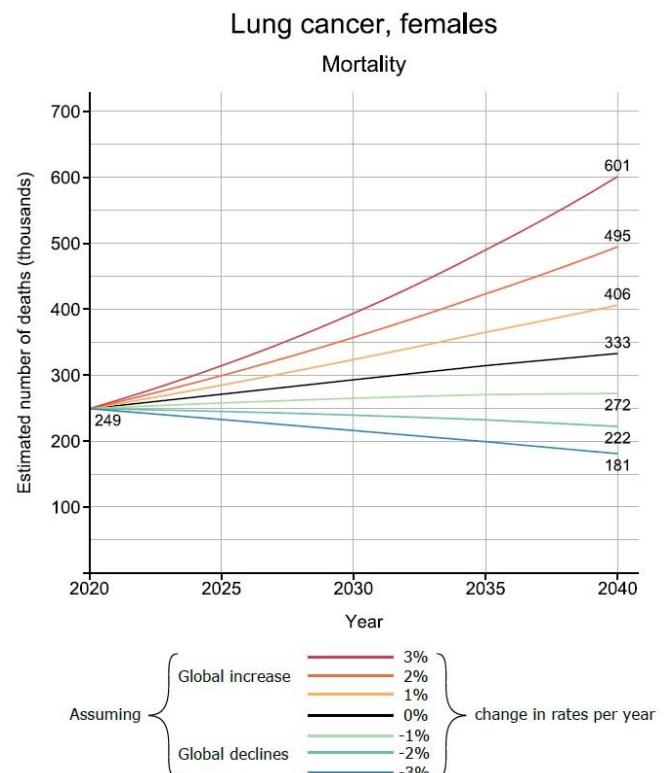

**Lung cancer mortality by sex - high HDI countries**

**C**

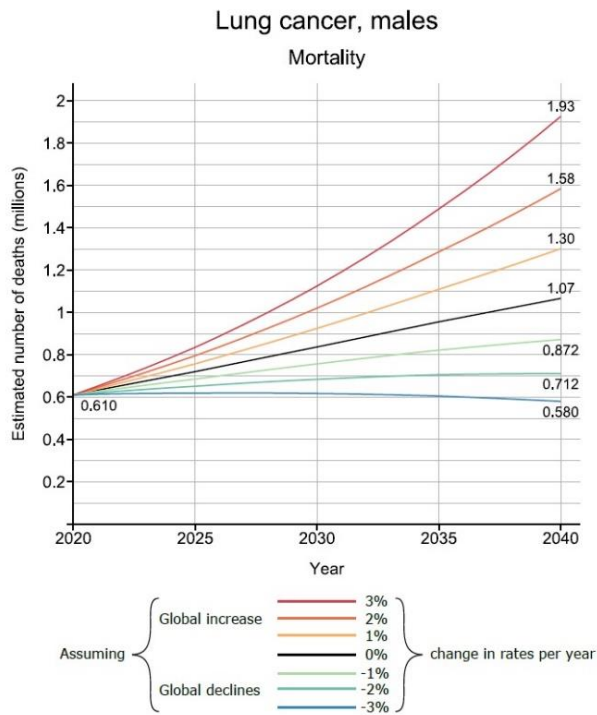

**D**

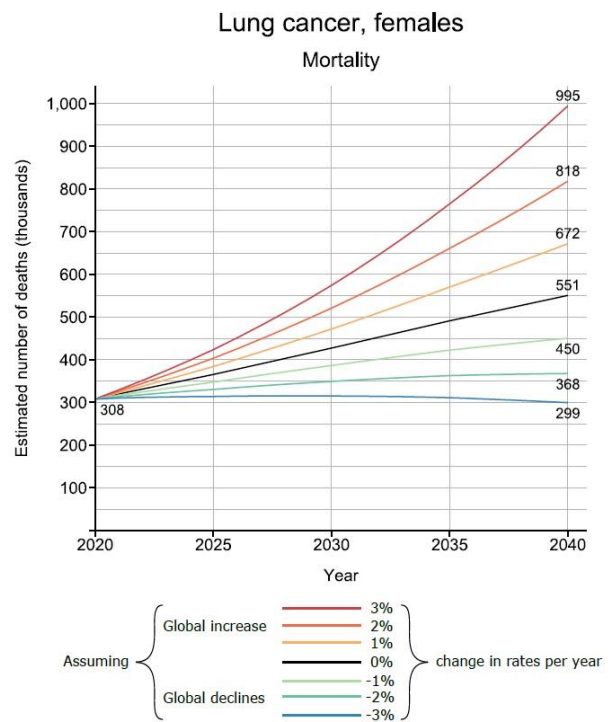

**Lung cancer mortality by sex - medium HDI countries**

**E**

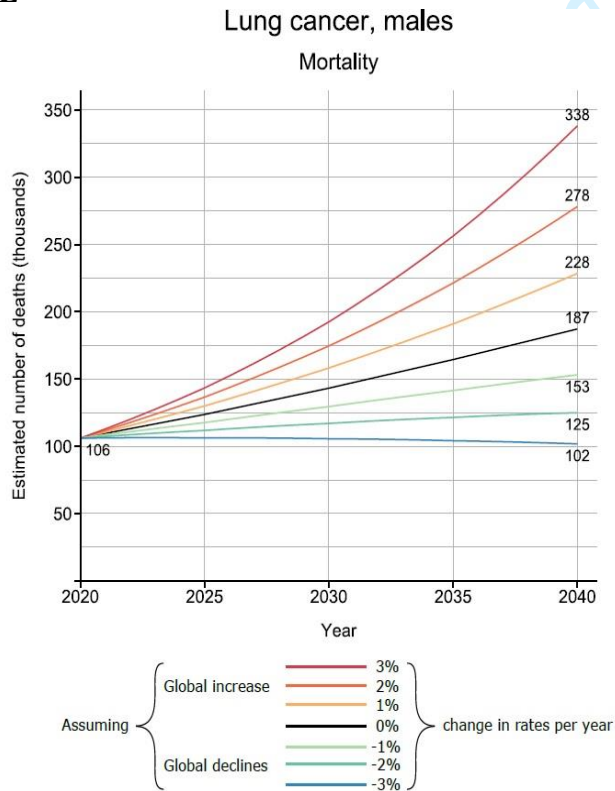

**F**

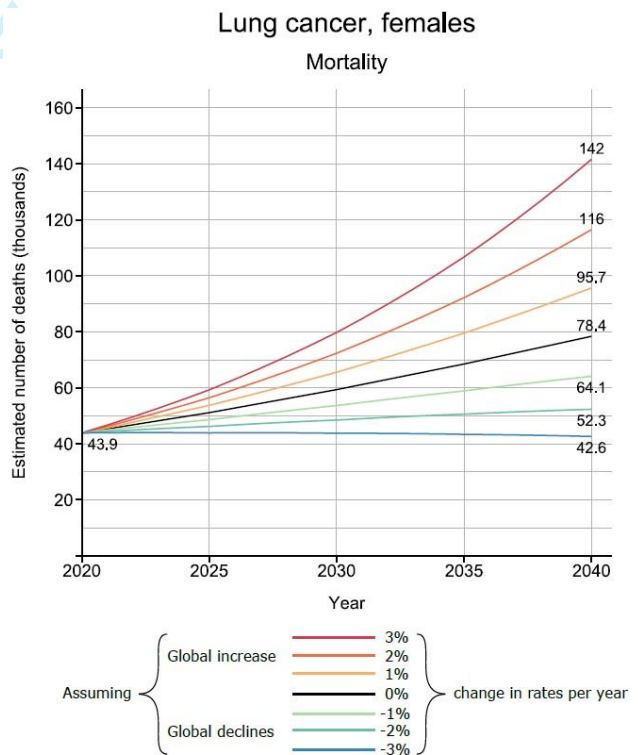

Lung cancer mortality by sex - low HDI countries

G

H

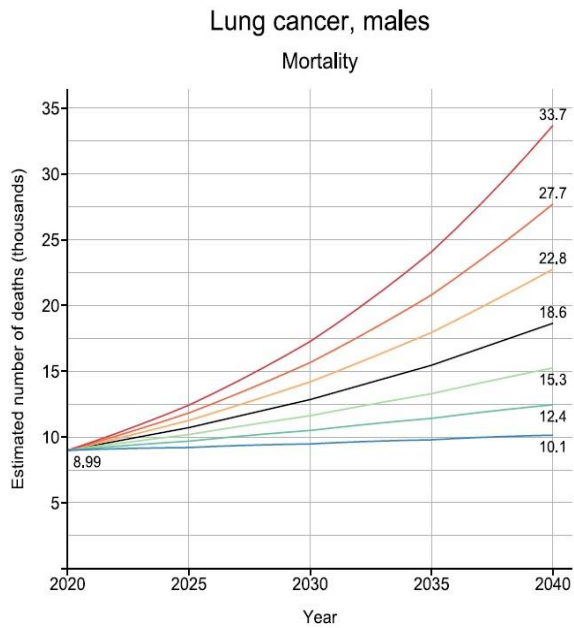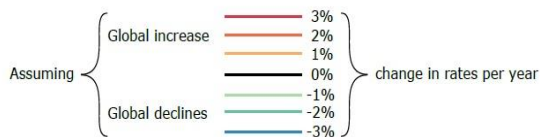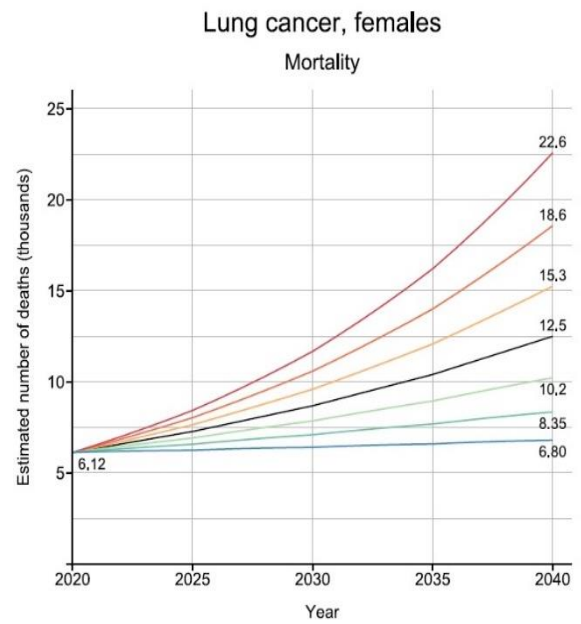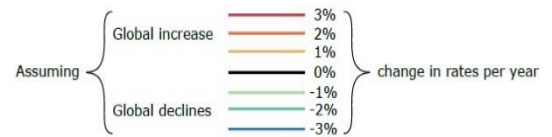

Review only

## STROBE Statement—checklist of items that should be included in reports of observational studies

|                              | Item No                                                                                                                                                                                                                                                                                                   | Recommendation                                                                                                                                                                                                                                                                                                                                                                                                                                                         | Page No |
|------------------------------|-----------------------------------------------------------------------------------------------------------------------------------------------------------------------------------------------------------------------------------------------------------------------------------------------------------|------------------------------------------------------------------------------------------------------------------------------------------------------------------------------------------------------------------------------------------------------------------------------------------------------------------------------------------------------------------------------------------------------------------------------------------------------------------------|---------|
| <b>Title and abstract</b>    | 1                                                                                                                                                                                                                                                                                                         | (a) Indicate the study's design with a commonly used term in the title or the abstract                                                                                                                                                                                                                                                                                                                                                                                 | 1       |
|                              |                                                                                                                                                                                                                                                                                                           | (b) Provide in the abstract an informative and balanced summary of what was done and what was found                                                                                                                                                                                                                                                                                                                                                                    | 2       |
| <b>Introduction</b>          |                                                                                                                                                                                                                                                                                                           |                                                                                                                                                                                                                                                                                                                                                                                                                                                                        |         |
| Background/rationale         | 2                                                                                                                                                                                                                                                                                                         | Explain the scientific background and rationale for the investigation being reported                                                                                                                                                                                                                                                                                                                                                                                   | 4       |
| Objectives                   | 3                                                                                                                                                                                                                                                                                                         | State specific objectives, including any prespecified hypotheses                                                                                                                                                                                                                                                                                                                                                                                                       | 4       |
| <b>Methods</b>               |                                                                                                                                                                                                                                                                                                           |                                                                                                                                                                                                                                                                                                                                                                                                                                                                        |         |
| Study design                 | 4                                                                                                                                                                                                                                                                                                         | Present key elements of study design early in the paper                                                                                                                                                                                                                                                                                                                                                                                                                | 4       |
| Setting                      | 5                                                                                                                                                                                                                                                                                                         | Describe the setting, locations, and relevant dates, including periods of recruitment, exposure, follow-up, and data collection                                                                                                                                                                                                                                                                                                                                        | 4       |
| Participants                 | 6                                                                                                                                                                                                                                                                                                         | (a) <i>Cohort study</i> —Give the eligibility criteria, and the sources and methods of selection of participants. Describe methods of follow-up<br><i>Case-control study</i> —Give the eligibility criteria, and the sources and methods of case ascertainment and control selection. Give the rationale for the choice of cases and controls<br><i>Cross-sectional study</i> —Give the eligibility criteria, and the sources and methods of selection of participants | 4       |
|                              |                                                                                                                                                                                                                                                                                                           | (b) <i>Cohort study</i> —For matched studies, give matching criteria and number of exposed and unexposed<br><i>Case-control study</i> —For matched studies, give matching criteria and the number of controls per case                                                                                                                                                                                                                                                 | 4       |
| Variables                    | 7                                                                                                                                                                                                                                                                                                         | Clearly define all outcomes, exposures, predictors, potential confounders, and effect modifiers. Give diagnostic criteria, if applicable                                                                                                                                                                                                                                                                                                                               | 6       |
| Data sources/<br>measurement | 8*                                                                                                                                                                                                                                                                                                        | For each variable of interest, give sources of data and details of methods of assessment (measurement). Describe comparability of assessment methods if there is more than one group                                                                                                                                                                                                                                                                                   | 4       |
| Bias                         | 9                                                                                                                                                                                                                                                                                                         | Describe any efforts to address potential sources of bias                                                                                                                                                                                                                                                                                                                                                                                                              | 7       |
| Study size                   | 10                                                                                                                                                                                                                                                                                                        | Explain how the study size was arrived at                                                                                                                                                                                                                                                                                                                                                                                                                              |         |
| Quantitative variables       | 11                                                                                                                                                                                                                                                                                                        | Explain how quantitative variables were handled in the analyses. If applicable, describe which groupings were chosen and why                                                                                                                                                                                                                                                                                                                                           | 4       |
| Statistical methods          | 12                                                                                                                                                                                                                                                                                                        | (a) Describe all statistical methods, including those used to control for confounding                                                                                                                                                                                                                                                                                                                                                                                  | 4       |
|                              |                                                                                                                                                                                                                                                                                                           | (b) Describe any methods used to examine subgroups and interactions                                                                                                                                                                                                                                                                                                                                                                                                    | 4       |
|                              | (c) Explain how missing data were addressed                                                                                                                                                                                                                                                               | 7                                                                                                                                                                                                                                                                                                                                                                                                                                                                      |         |
|                              | (d) <i>Cohort study</i> —If applicable, explain how loss to follow-up was addressed<br><i>Case-control study</i> —If applicable, explain how matching of cases and controls was addressed<br><i>Cross-sectional study</i> —If applicable, describe analytical methods taking account of sampling strategy | 4                                                                                                                                                                                                                                                                                                                                                                                                                                                                      |         |
|                              | (e) Describe any sensitivity analyses                                                                                                                                                                                                                                                                     | -                                                                                                                                                                                                                                                                                                                                                                                                                                                                      |         |

Continued on next page

| <b>Results</b>           |     |                                                                                                                                                                                                              |   |
|--------------------------|-----|--------------------------------------------------------------------------------------------------------------------------------------------------------------------------------------------------------------|---|
| Participants             | 13* | (a) Report numbers of individuals at each stage of study—eg numbers potentially eligible, examined for eligibility, confirmed eligible, included in the study, completing follow-up, and analysed            | - |
|                          |     | (b) Give reasons for non-participation at each stage                                                                                                                                                         | 4 |
|                          |     | (c) Consider use of a flow diagram                                                                                                                                                                           |   |
| Descriptive data         | 14* | (a) Give characteristics of study participants (eg demographic, clinical, social) and information on exposures and potential confounders                                                                     | 4 |
|                          |     | (b) Indicate number of participants with missing data for each variable of interest                                                                                                                          | - |
|                          |     | (c) <i>Cohort study</i> —Summarise follow-up time (eg, average and total amount)                                                                                                                             | - |
| Outcome data             | 15* | <i>Cohort study</i> —Report numbers of outcome events or summary measures over time                                                                                                                          | - |
|                          |     | <i>Case-control study</i> —Report numbers in each exposure category, or summary measures of exposure                                                                                                         | - |
|                          |     | <i>Cross-sectional study</i> —Report numbers of outcome events or summary measures                                                                                                                           | 5 |
| Main results             | 16  | (a) Give unadjusted estimates and, if applicable, confounder-adjusted estimates and their precision (eg, 95% confidence interval). Make clear which confounders were adjusted for and why they were included | 5 |
|                          |     | (b) Report category boundaries when continuous variables were categorized                                                                                                                                    | - |
|                          |     | (c) If relevant, consider translating estimates of relative risk into absolute risk for a meaningful time period                                                                                             | - |
| Other analyses           | 17  | Report other analyses done—eg analyses of subgroups and interactions, and sensitivity analyses                                                                                                               | 6 |
| <b>Discussion</b>        |     |                                                                                                                                                                                                              |   |
| Key results              | 18  | Summarise key results with reference to study objectives                                                                                                                                                     | 6 |
| Limitations              | 19  | Discuss limitations of the study, taking into account sources of potential bias or imprecision. Discuss both direction and magnitude of any potential bias                                                   | 7 |
| Interpretation           | 20  | Give a cautious overall interpretation of results considering objectives, limitations, multiplicity of analyses, results from similar studies, and other relevant evidence                                   | 6 |
| Generalisability         | 21  | Discuss the generalisability (external validity) of the study results                                                                                                                                        | 6 |
| <b>Other information</b> |     |                                                                                                                                                                                                              |   |
| Funding                  | 22  | Give the source of funding and the role of the funders for the present study and, if applicable, for the original study on which the present article is based                                                | 8 |

\*Give information separately for cases and controls in case-control studies and, if applicable, for exposed and unexposed groups in cohort and cross-sectional studies.

**Note:** An Explanation and Elaboration article discusses each checklist item and gives methodological background and published examples of transparent reporting. The STROBE checklist is best used in conjunction with this article (freely available on the Web sites of PLoS Medicine at <http://www.plosmedicine.org/>, Annals of Internal Medicine at <http://www.annals.org/>, and Epidemiology at <http://www.epidem.com/>). Information on the STROBE Initiative is available at [www.strobe-statement.org](http://www.strobe-statement.org).

# BMJ Open

## Lung cancer mortality in the wake of the changing smoking epidemic: a descriptive study of the global burden in 2020 and 2040.

|                                 |                                                                                                                                                                                                                                                                                                                                                                                                                                                                                                                                                                                                                                                                                                                                                                                                                                                                                                                                                                                                                                                                                         |
|---------------------------------|-----------------------------------------------------------------------------------------------------------------------------------------------------------------------------------------------------------------------------------------------------------------------------------------------------------------------------------------------------------------------------------------------------------------------------------------------------------------------------------------------------------------------------------------------------------------------------------------------------------------------------------------------------------------------------------------------------------------------------------------------------------------------------------------------------------------------------------------------------------------------------------------------------------------------------------------------------------------------------------------------------------------------------------------------------------------------------------------|
| Journal:                        | <i>BMJ Open</i>                                                                                                                                                                                                                                                                                                                                                                                                                                                                                                                                                                                                                                                                                                                                                                                                                                                                                                                                                                                                                                                                         |
| Manuscript ID                   | bmjopen-2022-065303.R2                                                                                                                                                                                                                                                                                                                                                                                                                                                                                                                                                                                                                                                                                                                                                                                                                                                                                                                                                                                                                                                                  |
| Article Type:                   | Original research                                                                                                                                                                                                                                                                                                                                                                                                                                                                                                                                                                                                                                                                                                                                                                                                                                                                                                                                                                                                                                                                       |
| Date Submitted by the Author:   | 01-Mar-2023                                                                                                                                                                                                                                                                                                                                                                                                                                                                                                                                                                                                                                                                                                                                                                                                                                                                                                                                                                                                                                                                             |
| Complete List of Authors:       | Weber, Andras; International Agency for Research on Cancer, Cancer Surveillance Branch; National Institute of Oncology, Hungarian National Cancer Registry<br>Morgan, Eileen; International Agency for Research on Cancer<br>Vignat, Jerome; International Agency for Research on Cancer<br>Laversanne, Mathieu; International Agency for Research on Cancer, Cancer Surveillance Branch<br>Pizzato, Margherita; International Agency for Research on Cancer; University of Milan, Department of Clinical Sciences and Community Health<br>Rumgay, Harriet; International Agency for Research on Cancer<br>Singh, Deependra; International Agency for Research on Cancer<br>Nagy, Péter; National Institute of Oncology, Department of Molecular Immunology and Toxicology; University of Veterinary Medicine, Department of Anatomy and Histology<br>Kenessey, István; National Institute of Oncology; Semmelweis University, Department of Pathology, Forensic and Insurance Medicine<br>Soerjomataram, Isabelle; WHO<br>Bray, Freddie; Int Agcy Res Canc, Cancer Surveillance Branch |
| <b>Primary Subject Heading</b>: | Epidemiology                                                                                                                                                                                                                                                                                                                                                                                                                                                                                                                                                                                                                                                                                                                                                                                                                                                                                                                                                                                                                                                                            |
| Secondary Subject Heading:      | Epidemiology, Global health, Health policy, Oncology, Public health                                                                                                                                                                                                                                                                                                                                                                                                                                                                                                                                                                                                                                                                                                                                                                                                                                                                                                                                                                                                                     |
| Keywords:                       | Epidemiology < TROPICAL MEDICINE, Health policy < HEALTH SERVICES ADMINISTRATION & MANAGEMENT, PUBLIC HEALTH, EPIDEMIOLOGY, Epidemiology < INFECTIOUS DISEASES                                                                                                                                                                                                                                                                                                                                                                                                                                                                                                                                                                                                                                                                                                                                                                                                                                                                                                                          |
|                                 |                                                                                                                                                                                                                                                                                                                                                                                                                                                                                                                                                                                                                                                                                                                                                                                                                                                                                                                                                                                                                                                                                         |

SCHOLARONE™  
Manuscripts



I, the Submitting Author has the right to grant and does grant on behalf of all authors of the Work (as defined in the below author licence), an exclusive licence and/or a non-exclusive licence for contributions from authors who are: i) UK Crown employees; ii) where BMJ has agreed a CC-BY licence shall apply, and/or iii) in accordance with the terms applicable for US Federal Government officers or employees acting as part of their official duties; on a worldwide, perpetual, irrevocable, royalty-free basis to BMJ Publishing Group Ltd ("BMJ") its licensees and where the relevant Journal is co-owned by BMJ to the co-owners of the Journal, to publish the Work in this journal and any other BMJ products and to exploit all rights, as set out in our [licence](#).

The Submitting Author accepts and understands that any supply made under these terms is made by BMJ to the Submitting Author unless you are acting as an employee on behalf of your employer or a postgraduate student of an affiliated institution which is paying any applicable article publishing charge ("APC") for Open Access articles. Where the Submitting Author wishes to make the Work available on an Open Access basis (and intends to pay the relevant APC), the terms of reuse of such Open Access shall be governed by a Creative Commons licence – details of these licences and which [Creative Commons](#) licence will apply to this Work are set out in our licence referred to above.

Other than as permitted in any relevant BMJ Author's Self Archiving Policies, I confirm this Work has not been accepted for publication elsewhere, is not being considered for publication elsewhere and does not duplicate material already published. I confirm all authors consent to publication of this Work and authorise the granting of this licence.

1  
2  
3 **1 Lung cancer mortality in the wake of the changing smoking epidemic: a descriptive study of the**  
4 **2 global burden in 2020 and 2040**

6  
7 3 András Wéber PhD<sup>1,2</sup>, Eileen Morgan PhD<sup>1</sup>, Jerome Vignat MSc<sup>1</sup>, Mathieu Laversanne  
8 MSc<sup>1</sup>, Margherita Pizzato PhD<sup>1,3</sup>, Harriet Rungay PhD<sup>1</sup>, Deependra Singh PhD<sup>1</sup>, Péter Nagy DSc<sup>4</sup>,  
9 István Kenessey MD PhD<sup>2</sup>, Isabelle Soerjomataram PhD<sup>1</sup>, Freddie Bray PhD<sup>1</sup>  
10  
11  
12

13  
14  
15  
16 7 <sup>1</sup> Cancer Surveillance Branch, International Agency for Research on Cancer, Lyon, France

17  
18 8 <sup>2</sup> Hungarian National Cancer Registry and National Tumorbiology Laboratory, National Institute of  
19 Oncology, Budapest, Hungary

20  
21  
22 10 <sup>3</sup> Department of Clinical Sciences and Community Health, University of Milan, Milan, Italy.

23  
24 11 <sup>4</sup> Department of Molecular Immunology and Toxicology and National Tumorbiology Laboratory,  
25 National Institute of Oncology, Budapest, Hungary  
26  
27  
28

29  
30 13

31  
32 14

33  
34 15

35  
36 16

37  
38 17

39  
40 18

41  
42 19

43  
44  
45  
46 20 Corresponding author:

47  
48 21 András Wéber

49  
50 22 Cancer Surveillance Branch  
51 International Agency for Research on Cancer  
52 email: andrasvonweber@gmail.com  
53

54  
55 24 Hungarian National Cancer Registry  
56 National Institute of Oncology  
57  
58  
59  
60



**Abstract***Objectives*

Lung cancer is the leading cause of cancer death in 2020, responsible for almost one in five (18.0%) deaths. This paper provides an overview of the descriptive epidemiology of lung cancer based on national mortality estimates for 2020 from the International Agency for Research on Cancer (IARC), and in the context of recent tobacco control policies.

*Methods*

Age-standardized mortality rates per 100,000 person-years of lung cancer for 185 countries by sex were obtained from the GLOBOCAN 2020 database and stratified by Human Development Index (HDI). Lung cancer deaths were projected to 2040 based on demographic changes alongside scenarios of annually increasing, stable or decreasing rates from the baseline year of 2020.

*Results*

Lung cancer mortality rates exhibited marked variations by geography and sex. Low HDI countries, many of them within sub-Saharan Africa, tend to have low levels of mortality and an upward trend in lung cancer deaths is predicted for both sexes until 2040 according to demographic projections, irrespective of trends in rates. In very high HDI countries, including Europe, Northern America and Australia/New Zealand, there are broadly decreasing trends in men whereas in women, rates are still increasing or reaching a plateau.

*Conclusion*

The current and future burden of lung cancer in a country or region largely depends on the present trajectory of the smoking epidemic in its constituent populations, with distinct gender differences in smoking patterns, both in transitioning and transitioned countries. Further elevations in lung cancer mortality are expected worldwide, raising important social and political questions, especially in low- and middle-income countries.

**Keywords:** lung cancer, mortality, projection

**Word count of abstract:** 257

**Word count of article:** 2623

1  
2  
3 70 **Strengths and limitations of this study**

4 71

5 72 *Strengths*

6 73

7 74 This study:

8 75

10 76 • presents a detailed profile of the present LC burden in men and women worldwide according to  
11 77 national levels of human development.

13 78

15 79 • applies a simple projection to estimate the future lung cancer mortality burden in 2040.

17 80

19 81 • discusses the results in the context of key risk factors for lung cancer, particularly the continually  
20 82 evolving smoking epidemic.

22 83

23 84 *Limitations*

24 85

26 86 This study:

27 87

28 88 • is hampered by the limited availability of local cause of death information from national vital  
30 89 registration sources, particularly in transitioning countries.

32 90

33 91

34 92

35 93

36 94

38 94

39

40

41

42

43

44

45

46

47

48

49

50

51

52

53

54

55

56

57

58

59

60

## 95 **Introduction**

96 Lung cancer (LC) ranks as the most frequent form of cancer death and premature cancer mortality  
97 (ages 30-69) with uniformly low 5-year survival, even in high-income countries [1]. With one-fifth of  
98 the present cancer mortality worldwide due to LC – an estimated 1.8 million deaths in 2020 [2] – the  
99 key determinant remains tobacco consumption. Up to 9 in 10 LC cases are caused by smoking in high-  
100 income settings, while mortality increases with number of cigarettes smoked and smoking duration [3].  
101 Lopez et al. drew attention to the phases of the global smoking epidemic and the subsequent impact of  
102 smoking on LC occurrence by sex [4]; men and women remain in very different phases of the smoking  
103 epidemic, as reflected in disease rates by birth cohort. Recent reports have generally described marked  
104 variations in rates between sexes, with stable or decreasing rates found predominantly among male while  
105 increasing rates among female populations [5,6].

106 An emerging pattern is a higher rate of LC incidence among young females than males across  
107 geographic areas and income levels, that is not fully explained by sex-specific differences in smoking  
108 prevalence [7]. Such temporal patterns forewarn of a higher LC burden in women than men at older ages  
109 in decades to follow, especially in higher-income settings. Women have been increasingly targeted in  
110 marketing campaigns, particularly in transitioning countries, while social constraints that precluded  
111 women taking up the habit are weakening [8]; still, smoking prevalence among women varies markedly,  
112 for example, a small proportion of women in China are current smokers, in absolute terms and relative  
113 to men [9].

114 This paper presents a global overview of the descriptive epidemiology of LC in relation to recent  
115 tobacco control policies, using the GLOBOCAN mortality estimates for the year 2020 provided by the  
116 International Agency for Research on Cancer (IARC) [10]. In addition, we provide projections of the  
117 future mortality burden according to different temporal scenarios to the year 2040, estimating the  
118 expected future LC deaths according to levels of Human Development Index (HDI).

119

## 120 **Data Sources and Methods**

121 The number of deaths from, cancers of the lung (ICD-10 C33-34, including trachea and bronchus)  
122 were extracted from IARC's GLOBOCAN 2020 database for 185 countries or territories, by sex and 18  
123 age groups (0-4, 5-9, ..., 80-84, 85 and over) [2,10,11]. Corresponding population data for 2020 were  
124 extracted from the United Nations (UN) website [12]. The data sources and hierarchy of methods used  
125 in compiling the cancer estimates have been described in detail elsewhere [10]. In brief, the  
126 GLOBOCAN estimates are assembled at the national level using the best available sources of cancer  
127 incidence and mortality data within a given country. The methods used to derive the 2020 estimates  
128 corresponding to those used to derived for previous years [13,14,15] where applicable, priority is given

1  
2  
3 129 to short-term predictions and modelled mortality to incidence (M:I) ratios, while validity is dependent  
4  
5 130 on the degree of representativeness and quality of the source information [10].

6 131 We present figures based on the estimated deaths in 2020, as well as two summary measures using  
7  
8 132 direct standardization, namely the age-standardized mortality rate (ASR) per 100,000 person-years  
9  
10 133 based on the 1966 Segi-Doll World standard population [16,17] and the cumulative risk of dying from  
11  
12 134 cancer before the age of 75 expressed as a percentage, assuming the absence of competing causes of  
13  
14 135 death [18]. These measures allow comparisons between populations adjusted for differences in age  
15  
16 136 structures. We also provide a prediction of the future number of LC deaths worldwide for the year 2040,  
17  
18 137 based on demographic projections and scenarios of uniformly increasing (+3%, +2%, +1%), stable (0%)  
19  
20 138 or decreasing (-1%, -2%, -3%) rates annually from the baseline year of 2020. The possible impact of  
21  
22 139 COVID-19 pandemic was not taken into consideration during the calculations.

23  
24 140 The results are presented by country and aggregated across 20 UN-defined world regions [12] and  
25  
26 141 according to the UN's four-tier HDI in 2020 [19], as a means to assess the cancer burden across four  
27  
28 142 levels of development (low, medium, high and very high HDI). Throughout, we use the terms  
29  
30 143 *transitioning*, *emerging* and *lower HDI* countries/economies as synonyms for nations classified as low  
31  
32 144 or medium HDI, and *transitioned* or *higher HDI* countries/economies for those classified as high or very  
33  
34 145 high HDI.

35 146 The Global Cancer Observatory (GCO, <https://gco.iarc.fr>) includes facilities for the tabulation  
36  
37 147 and graphical visualization of the GLOBOCAN database, including explorations of the current [2] and  
38  
39 148 future [20] burden for 36 cancer types.

40 149 Patient and Public Involvement: Patients or the public were not involved in the design, or  
41  
42 150 conduct, or reporting, or dissemination plans of our research.

43 151

## 44 152 **Results**

### 45 153 *Lung cancer mortality – national rankings 2020*

46 154 Figure 1 presents global maps that indicate LC's position in terms of deaths relative to other  
47  
48 155 common tumours at the national level, by sex for the year 2020. In 2020, LC ranks first in terms of  
49  
50 156 cancer death in half (93 out of 185) of the countries included in GLOBOCAN, and either 2<sup>nd</sup> or 3<sup>rd</sup> in 37  
51  
52 157 countries, in men. LC is a major contributor to cancer mortality around the world, including America,  
53  
54 158 greater-Europe, Northern Africa, and across the Asian-Pacific region. There is a less dominant role at  
55  
56 159 present in South America and Sub-Saharan Africa (but not South Africa). In women, the impact is lesser  
57  
58 160 but still very much in evidence; the disease ranks as the leading form of cancer death in 25 countries  
59  
60 161 including those within North America, Northern, Western and Southern-Central Europe, Eastern Asia  
162  
163 162 and Australia/New Zealand. LC mortality ranks as the 2<sup>nd</sup> or 3<sup>rd</sup> leading form of cancer mortality in 54  
164  
165 163 countries worldwide in women.

1  
2  
3 164 There is at least a 20-fold variation in mortality between the sexes, with rates uniformly higher  
4  
5 165 among men (Figure 2). Male mortality rates are higher in Eastern and Southern Europe (especially in  
6  
7 166 Hungary and Serbia with rates of 60 per 100,000), Eastern Asia (particularly the Democratic People's  
8  
9 167 Republic of Korea) and Polynesia and Micronesia, while rates are lower in Central America, South-  
10  
11 168 Central Asia and most parts of sub-Saharan Africa. The highest female rates are observed in Northern  
12  
13 169 America, Northern and Western Europe, and Australia/New Zealand specifically in Canada, Denmark  
14  
15 170 and the Netherlands, respectively. Relatively low rates are observed in Western-, South-Eastern Asia  
16  
17 171 and across the African continent, excluding South Africa.

#### 172 *Lung cancer mortality burden by 2040*

173  
174 If the current rates were to remain constant over the next two decades, LC will claim around 2  
175 million male deaths in 2040, compared to 1.2 million in 2020 (Figure 3). For women, the corresponding  
176 deaths are approximately half of their male counterparts: a predicted increase to 1 million in 2040 from  
177 600 000 deaths in 2020. The projection also shows the different scenarios considering the changing rates  
178 per year between -3% and +3% based on plausible scenarios of the smoking epidemic in the short-term  
179 future; global declines in the number of LC among males but increases for female are perhaps the more  
180 realistic scenarios, with national or regional exceptions. Taking this trends-based prediction into  
181 account, the predicted number of deaths due to LC for men will likely range between 1.1 and 1.6 million  
182 and for women between 1.2 and 1.8 million by 2040. Deaths will markedly increase for both sexes in  
183 countries with the lowest HDI, even in the best-case trend scenario (Appendix Figure 1a-h).

## 184 **Discussion**

185  
186 This study highlights the present geographic diversity in LC mortality worldwide, by sex and by  
187 level of human development. Countries with low HDI tend to have low LC mortality rates but may  
188 anticipate a higher mortality burden by 2040. For higher HDI countries, the burden of the disease is  
189 higher among men, but future trends suggest an increasingly greater proportion of the cancer burden  
190 will be seen among females. These different scenarios are due to the impact of historic smoking trends  
191 and the increasingly widespread application of tobacco control measures in the last decades [21]. While  
192 there is an expectation that LC mortality will increase in transitioning countries given there is less  
193 implementation of effective tobacco control, there is a positivity in the findings from the Global Tobacco  
194 Control Report: the number of people now living in countries with at least two anti-tobacco policies in  
195 place rose from 3.5 billion in 2018 to 4.4 billion in 2020 – up from 45% of the world's population to  
196 56% in two years [22].

197  
198 Past smoking histories of nations are a key determinant of the current magnitude of LC in many  
199 populations worldwide, as described by the classical model of the global smoking epidemic, first  
200 introduced by Lopez et al [4]. In the model, the effect of different smoking patterns was captured by four

1  
2  
3 199 stages in the population, by an earlier adoption of the habit in men compared with women, and by the  
4  
5 200 progressive adoption among lower socioeconomic classes, where the habit continues to be an underlying  
6  
7 201 cause of the marked inequalities seen in different educational groups [23]. Lopez et al. initially applied  
8  
9 202 the hypothesis on just a few developed countries [24], which was later tested on greater geographic  
10  
11 203 scales [25,26]. Nevertheless, as smoking prevalence and subsequent LC rates began to peak and decline  
12  
13 204 among men in many populations over the last decades, a key focus has been the deteriorating public  
14  
15 205 health situation affecting women, where in many settings, rates of LC mortality have continued to rise.  
16  
17 206 This raises several relevant biological, epidemiological and sociological concerns [27], including: the  
18  
19 207 changing distribution of the main histological subtypes of LC over time [28], the extent to which females  
20  
21 208 adopted the habit of smoking and their vulnerability to the tobacco industry [29,30], the impact of such  
22  
23 209 a transition in diminishing gender differences in disease burden worldwide [31] and the effects of  
24  
25 210 different political systems on the health awareness of individuals [32,33]. The impact of these factors is  
26  
27 211 reflected in comparisons of between-country LC mortality rates; for example, the current rate differences  
28  
29 212 in Eastern vs. Northern European countries.

30  
31 213 Smoking is of course not the only risk factor for LC. There is strong evidence of a relation with  
32  
33 214 other factors, including air pollution, climate change [34] and other occupational risk factors such as  
34  
35 215 asbestosis and indoor exposure to cooking fumes etc [35]. The highest exposure to ambient air pollution  
36  
37 216 is the characteristic of mainly countries in transition, where only modest reductions in burden will occur  
38  
39 217 in the most polluted countries unless fine particulate matter (PM 2.5) values are decreased substantially  
40  
41 218 [36].

42  
43 219 Several other studies have aimed to forecast the future lung cancer burden in very high HDI  
44  
45 220 countries e.g., the US [37] and the UK [38] with contradictory findings. While the steeply declining  
46  
47 221 mortality in the US for both sexes until 2040 fits within the framework of the global smoking epidemic,  
48  
49 222 the rising deaths reported in the UK for men and women until 2035 somewhat contradict previous  
50  
51 223 findings. One explanation could be the rapidly ageing population, which can increase the number of  
52  
53 224 these non-standardized figures. Alternatively, these projections do not take into account the changing  
54  
55 225 smoking prevalence in the past as a key determinant of present and future lung cancers. Our  
56  
57 226 GLOBOCAN 2020 forecasts do not consider these either, however, we provide possible scenarios on  
58  
59 227 the basis of uniform increases or decreases in rates that may help provide a realistic overview of the  
60  
228 changing future burden of LC.

229  
230 229 Another limitation of this study is the large variability in the availability and quality of cancer  
231  
232 230 mortality data. Most African and some Asian countries suffer from weak mortality statistics systems. In  
233  
234 231 GLOBOCAN, in countries where mortality series were not available from national vital registration  
235  
236 232 sources, the predominant means of the estimation of rates were from corresponding national incidence

1  
2  
3 233 estimates via modelling, using incidence-to-mortality ratios derived from cancer registries in  
4 234 neighbouring countries.

6  
7 235 With over three million deaths predicted by 2040 in the absence of additional interventions  
8 236 according to the finding of this study, it is imperative to emphasize primary prevention as the most cost-  
9 237 effective strategy of tobacco control. It has been shown that raising the price of cigarettes through  
11 238 increased excise taxes can bring marked reductions in cigarette consumption [39]. Besides this,  
13 239 developing adaptive tobacco control strategies that target different subgroups is imperative.

15 240 One key concern is the limited financial and trained resources in middle- and lower-income  
16 241 countries, that can hinder health promotion and cancer prevention strategies in these countries. Based  
17 242 on our findings, decreases in lung cancer rates are not likely in these countries until 2040 and presumably  
19 243 tobacco companies are expected to shift and escalate promotional campaigns to preserve business  
21 244 interests and profits where resistance efforts are the weakest [30].

23  
24 245 Additionally, anti-tobacco strategies should urgently target women in also higher-income settings  
25 246 such as the EU, in order to halt their rapidly increasing risk of LC, and prevent unnecessary, premature  
26 247 deaths among future generations of women [40]. In Sweden, as an example, gender-specific policies  
27 248 such as those directed at health promotion have been implemented with a focus on young and pregnant  
29 249 women. Scotland also has gender-specific programs, such as the Women, Low Income, and Smoking  
31 250 Project [41]. Amos and Haglund (2000) have emphasized that building support for female-centered  
32 251 tobacco control programs through partnerships will be vital to achieve success [30]. Furthermore, Amos  
33 252 (1996) and Mackay and Amos (2003) draw attention to the situation of women in transitioning countries  
34 253 with presently low levels of cigarette smoking among women [29]. In these countries, smoking among  
35 254 girls is already on the rise, women's spending power is increasing, cigarettes are becoming affordable,  
36 255 and women are more exposed to the marketing strategies of tobacco companies, in an environment  
37 256 where cultural constraints are weakening and female-specific quitting programs are rare [8].

38  
39  
40  
41  
42  
43 257 A package of measures to suppress tobacco consumption in a given population has been  
44 258 recommended through continued efforts to increase the proportion of ex-smokers, with a focus on  
45 259 younger generations [42]. This could perhaps be achieved by implementing coordinated smoking  
46 260 prevention and control strategies from an early age, in the form of educational programs in schools.  
47 261 Other measures that could be introduced include community intervention programs, mass media  
48 262 campaigns and further legislation to ban smoking in public places. One of the main problems is that  
49 263 young people react very differently to anti-smoking messages compared to adult long-term smokers  
50 264 [42]. The harm-reducing role of e-cigarettes and aid to smoking cessation has been proposed [43],  
51 265 however their impact on future LC mortality is not yet known [44]. Successful programs have also been  
52 266 implemented in rapidly emerging economies such as Brazil, where a reduction in smoking prevalence  
53 267 were observed after the ratification of the WHO Framework Convention on Tobacco Control (FCTC)

1  
2  
3 268 in 2005, and the adoption of a national ban on tobacco advertising, a national comprehensive smoke-  
4  
5 269 free policy, large pictorial health warnings on cigarette packages, and continuous increases in taxes and  
6  
7 270 prices of tobacco products [45]. Other factors may influence the future burden of LC such as the potential  
8  
9 271 introduction of screening in high-risk populations. In a recent trial, LC mortality was significantly lower  
10  
11 272 among those who underwent volume computed tomography (CT) screening than those who did not  
12  
13 273 participate [46]. Screened patients benefitted from a substantial shift to lower-stage cancers at the time  
14  
15 274 of diagnosis as well as more frequent eligibility for curative treatment (mainly surgery) [47]. However,  
16  
17 275 concerns have been raised about the potential for overdiagnosis in lung-cancer screening.

16 276 In summary, this paper has identified marked geographic variations in the current LC burden  
17  
18 277 worldwide and provided potential scenarios regarding the short-term future LC deaths up until 2040.  
19  
20 278 Gredner et al., have illustrated the great potential of comprehensive implementation of tobacco control  
21  
22 279 policies in Greater-Europe, with over 1.6 million LC cases preventable over a 20-year period through  
23  
24 280 the highest-level implementation of tobacco control policies [48]. There is therefore much we can do to  
25  
26 281 halt the rising deaths from LC – as well as many other forms of cancer and non-communicable diseases  
27  
28 282 – through the successful implementation of tobacco control policies.

28 283

#### 30 284 **Disclosure**

31 285 Where authors are identified as personnel of the International Agency for Research on Cancer/World  
32  
33 286 Health Organization, the authors alone are responsible for the views expressed in this article, and they  
34  
35 287 do not necessarily represent the decisions, policy, or views of the International Agency for Research on  
36  
37 288 Cancer/World Health Organization.

38 289

#### 39 290 **Role of the funding source**

41 291 PN: This study was supported by the Topic Excellence Program (TKP2020-NKA-26, TKP2021-EGA-  
42  
43 292 44), the National Laboratories Program (National Tumor Biology Laboratory-2022-2.1.1-NL-2022-  
44  
45 293 00010), and Tasks Related to the National Public Health Strategy (IV/4925/2021/ EKF).

46 294

#### 47 295 **Authors' contribution**

49 296 AW: literature search, data analysis, writing – original draft; EM: writing – review & editing; JV:  
50  
51 297 figures, visualisation; ML: methodology, figures, visualisation; MP: writing – review & editing; HR:  
52  
53 298 writing – review & editing; DS: writing – review & editing; PN: writing – review & editing, funding  
54  
55 299 acquisition; IK: writing – review & editing; IS: writing – review & editing; FB: methodology,  
56  
57 300 conceptualisation, data analysis, writing – original draft

57 301

#### 58 302 **Declaration of interests**

59  
60



1  
2  
3 303 All authors declare that they have no conflicts of interest.  
4  
5 304

#### 6 7 305 **Data sharing**

8 306 Data are available in a public, open access repository.  
9  
10 307

#### 11 308 **Ethics Approval Statement**

12 309 This study does not involve human participants and animal subjects.  
13  
14 310

#### 15 311 **References**

16  
17 312 [1] Arnold M, Rutherford MJ, Bardot A, *et al.* Progress in cancer survival, mortality, and incidence in  
18 313 seven high-income countries 1995–2014 (ICBP SURVMARK-2): a population-based study. *The*  
19 314 *Lancet Oncology* 2019; **20**: 1493–505.

20  
21  
22 315 [dataset] [2] Ferlay J, Ervik M, Lam F, Colombet M, Mery L, Piñeros M, Znaor A, Soerjomataram I,  
23 316 Bray F (2020). Global Cancer Observatory: Cancer Today. Lyon, France: International Agency for  
24 317 Research on Cancer. Available from: <https://gco.iarc.fr/today>, accessed [13 April 2022].

25  
26 318 [3] National Center for Chronic Disease Prevention and Health Promotion (US) Office on Smoking  
27 319 and Health. The Health Consequences of Smoking—50 Years of Progress: A Report of the Surgeon  
28 320 General. Atlanta (GA): Centers for Disease Control and Prevention (US), 2014  
29 321 <http://www.ncbi.nlm.nih.gov/books/NBK179276/> (accessed April 14, 2022).

30  
31 322 [4] Lopez AD, Collishaw NE, Piha T. A descriptive model of the cigarette epidemic in developed  
32 323 countries. *Tobacco Control* 1994; **3**: 242–7.

33  
34 324 [5] Bray FI, Weiderpass E. Lung cancer mortality trends in 36 European countries: secular trends and  
35 325 birth cohort patterns by sex and region 1970-2007. *Int J Cancer* 2010; **126**: 1454–66.

36  
37 326 [6] Miranda-Filho A, Piñeros M, Bray F. The descriptive epidemiology of lung cancer and tobacco  
38 327 control: a global overview 2018. *Salud Publica Mex* 2019; **61**: 219–29.

39  
40 328 [7] Fidler-Benaoudia MM, Torre LA, Bray F, Ferlay J, Jemal A. Lung cancer incidence in young  
41 329 women vs. young men: A systematic analysis in 40 countries. *International Journal of Cancer* 2020;  
42 330 **147**: 811–9.

43  
44 331 [8] Mackay J, Amos A. Women and tobacco. *Respirology* 2003; **8**: 123–30.

45  
46 332 [9] Sansone N, Yong H-H, Li L, Jiang Y, Fong GT. Perceived acceptability of female smoking in  
47 333 China: findings from waves 1 to 3 of the ITC China Survey. *Tob Control* 2015; : tobaccocontrol-2015-  
48 334 052380.

49  
50 335 [10] Ferlay J, Colombet M, Soerjomataram I, *et al.* Cancer statistics for the year 2020: An overview.  
51 336 *International Journal of Cancer* 2021; **149**: 778–89.

52  
53 337 [11] Sung H, Ferlay J, Siegel RL, *et al.* Global Cancer Statistics 2020: GLOBOCAN Estimates of  
54 338 Incidence and Mortality Worldwide for 36 Cancers in 185 Countries. *CA Cancer J Clin* 2021; **71**:  
55 339 209–49.

56  
57 340 [12] UNSD — Methodology. <https://unstats.un.org/unsd/methodology/m49/> (accessed April 15,  
58 341 2022).

- 1  
2  
3 342 [13] Ferlay J, Colombet M, Soerjomataram I, *et al.* Estimating the global cancer incidence and  
4 343 mortality in 2018: GLOBOCAN sources and methods. *Int J Cancer* 2019; **144**: 1941–53.  
5  
6 344 [14] Ferlay J, Soerjomataram I, Dikshit R, *et al.* Cancer incidence and mortality worldwide: sources,  
7 345 methods and major patterns in GLOBOCAN 2012. *Int J Cancer* 2015; **136**: E359-386.  
8  
9 346 [15] Ferlay J, Shin H-R, Bray F, Forman D, Mathers C, Parkin DM. Estimates of worldwide burden of  
10 347 cancer in 2008: GLOBOCAN 2008. *International Journal of Cancer* 2010; **127**: 2893–917.  
11  
12 348 [16] Cancer Mortality for Selected Sites in 24 Countries (1950–57) – ScienceOpen.  
13 349 <https://www.scienceopen.com/document?vid=d36053cb-ebfe-4b4c-a7ca-05447aa3cd19> (accessed  
14 350 April 15, 2022).  
15  
16 351 [17] Schneiderman MA. Cancer Incidence in Five Continents: A Technical Report: Richard Doll,  
17 352 Peter Payne, and John Waterhouse (eds.). New York: Springer-Verlag, 1966. 244 pp. \$9.50. *Cancer*  
18 353 *Research* 1968; **28**: 804.  
19  
20 354 [18] Day NE. Cancer Incidence in Five Continents. Cumulative rate and cumulative risk. IARC Sci  
21 355 Publ 1992; 862–4.  
22  
23 356 [19] Human Development Reports | United Nations Development Programme. <https://hdr.undp.org/>  
24 357 (accessed April 15, 2022).  
25  
26 358 [dataset] [20] Ferlay J, Laversanne M, Ervik M, Lam F, Colombet M, Mery L, Piñeros M, Znaor A,  
27 359 Soerjomataram I, Bray F (2020). Global Cancer Observatory: Cancer Tomorrow. Lyon, France:  
28 360 International Agency for Research on Cancer. Available from: <https://gco.iarc.fr/tomorrow>, accessed  
29 361 [15 April 2022].  
30  
31 362 [21] Tobacco Atlas. 2022; published online Feb 25. <https://tobaccoatlas.org/> (accessed Sept 9, 2022).  
32  
33 363 [22] Global tobacco report 2021. [https://www.who.int/teams/health-promotion/tobacco-control/global-](https://www.who.int/teams/health-promotion/tobacco-control/global-tobacco-report-2021)  
34 364 [tobacco-report-2021](https://www.who.int/teams/health-promotion/tobacco-control/global-tobacco-report-2021) (accessed Sept 22, 2022).  
35  
36 365 [23] Cavelaars AE, Kunst AE, Geurts JJ, *et al.* Educational differences in smoking: international  
37 366 comparison. *BMJ* 2000; **320**: 1102–7.  
38  
39 367 [24] Thun M, Peto R, Boreham J, Lopez AD. Stages of the cigarette epidemic on entering its second  
40 368 century. *Tobacco Control* 2012; **21**: 96–101.  
41  
42 369 [25] Janssen F, Gewily SE, Bardoutsos A. Smoking epidemic in Europe in the 21st century. *Tobacco*  
43 370 *Control* 2021; **30**: 523–9.  
44  
45 371 [26] Wensink M, Alvarez J-A, Rizzi S, Janssen F, Lindahl-Jacobsen R. Progression of the smoking  
46 372 epidemic in high-income regions and its effects on male-female survival differences: a cohort-by-age  
47 373 analysis of 17 countries. *BMC Public Health* 2020; **20**: 39.  
48  
49 374 [27] Shapiro D. Smoking Tobacco: Irrationality, Addiction, and Paternalism. *Public Affairs Quarterly*  
50 375 1994; **8**: 187–203.  
51  
52 376 [28] Lortet-Tieulent J, Soerjomataram I, Ferlay J, Rutherford M, Weiderpass E, Bray F. International  
53 377 trends in lung cancer incidence by histological subtype: adenocarcinoma stabilizing in men but still  
54 378 increasing in women. *Lung Cancer* 2014; **84**: 13–22.  
55  
56 379 [29] Amos A. Women and smoking. *British Medical Bulletin* 1996; **52**: 74–89.  
57  
58  
59  
60

- 1  
2  
3 380 [30] Amos A. From social taboo to ‘torch of freedom’: the marketing of cigarettes to women. *Tobacco*  
4 381 *Control* 2000; **9**: 3–8.  
5  
6 382 [31] Pampel FC. Cigarette Use and the Narrowing Sex Differential in Mortality. *Population and*  
7 383 *Development Review* 2002; **28**: 77–104.  
8  
9 384 [32] Carlson E, Hoffmann R. The State Socialist Mortality Syndrome. *Population Research and*  
10 385 *Policy Review* 2011; **30**: 355–79.  
11  
12 386 [33] Meslé F, Vallin J. The End of East–West Divergence in European Life Expectancies? An  
13 387 Introduction to the Special Issue. *European Journal of Population* 2017; **33**: 615–27.  
14  
15 388 [34] Vineis P, Huybrechts I, Millett C, Weiderpass E. Climate change and cancer: converging policies.  
16 389 *Molecular Oncology* 2021; **15**: 764–9.  
17  
18 390 [35] Malhotra J, Malvezzi M, Negri E, La Vecchia C, Boffetta P. Risk factors for lung cancer  
19 391 worldwide. *Eur Respir J* 2016; **48**: 889–902.  
20  
21 392 [36] Cohen AJ, Brauer M, Burnett R, *et al*. Estimates and 25-year trends of the global burden of  
22 393 disease attributable to ambient air pollution: an analysis of data from the Global Burden of Diseases  
23 394 Study 2015. *The Lancet* 2017; **389**: 1907–18.  
24  
25 395 [37] Rahib L, Wehner MR, Matrisian LM, Nead KT. Estimated Projection of US Cancer Incidence  
26 396 and Death to 2040. ; : 14.  
27  
28 397 [38] Smittenaar CR, Petersen KA, Stewart K, Moitt N. Cancer incidence and mortality projections in  
29 398 the UK until 2035. *Br J Cancer* 2016; **115**: 1147–55.  
30  
31 399 [39] Jha P, Peto R. Global Effects of Smoking, of Quitting, and of Taxing Tobacco. *New England*  
32 400 *Journal of Medicine* 2014; **370**: 60–8.  
33  
34 401 [40] Bray F, Tyczynski JE, Parkin DM. Going up or coming down? The changing phases of the lung  
35 402 cancer epidemic from 1967 to 1999 in the 15 European Union countries. *Eur J Cancer* 2004; **40**: 96–  
36 403 125.  
37  
38 404 [41] Jonathan Samet, Soon-Young Yoon. Women and the tobacco epidemic. Challenges for the 21st  
39 405 century. The World Health Organization in collaboration with the Institute for Global Tobacco Control  
40 406 Johns Hopkins School of Public Health. 2001.  
41  
42 407 [42] Tyczynski JE, Bray F, Aareleid T, *et al*. Lung cancer mortality patterns in selected Central,  
43 408 Eastern and Southern European countries. *Int J Cancer* 2004; **109**: 598–610.  
44  
45 409 [43] Notley C, Ward E, Dawkins L, Holland R. The unique contribution of e-cigarettes for tobacco  
46 410 harm reduction in supporting smoking relapse prevention. *Harm Reduction Journal* 2018; **15**: 31.  
47  
48 411 [44] Marques P, Piqueras L, Sanz M-J. An updated overview of e-cigarette impact on human health.  
49 412 *Respiratory Research* 2021; **22**: 151.  
50  
51 413 [45] Dai X, Gakidou E, Lopez AD. Evolution of the global smoking epidemic over the past half  
52 414 century: strengthening the evidence base for policy action. *Tob Control* 2022; **31**: 129–37.  
53  
54 415 [46] de Koning HJ, van der Aalst CM, de Jong PA, *et al*. Reduced Lung-Cancer Mortality with  
55 416 Volume CT Screening in a Randomized Trial. *N Engl J Med* 2020; **382**: 503–13.  
56  
57 417 [47] Yousaf-Khan U, van der Aalst C, de Jong PA, *et al*. Final screening round of the NELSON lung  
58 418 cancer screening trial: the effect of a 2.5-year screening interval. *Thorax* 2017; **72**: 48–56.

1  
2  
3 419 [48] Gredner T, Mons U, Niedermaier T, Brenner H, Soerjomataram I. Impact of tobacco control  
4 420 policies implementation on future lung cancer incidence in Europe: An international, population-based  
5 421 modeling study. *The Lancet Regional Health - Europe* 2021; **4**: 100074.  
6

7 422  
8

9 423 Figures

10  
11 424 Figure 1: Lung cancer mortality compared with mortality from other causes of malignant neoplasms,  
12 425 2020, Male-Female

13  
14 426 Figure 2: Lung cancer age-standardized mortality rates per 100,000 by world regions and sex in 2020,  
15 427 Male-Female

16  
17 428 Figure 3: Lung cancer mortality projections worldwide from 2020 to 2040 by sex and the Human  
18 429 Development Index (HDI)  
19  
20  
21  
22  
23  
24  
25  
26  
27  
28  
29  
30  
31  
32  
33  
34  
35  
36  
37  
38  
39  
40  
41  
42  
43  
44  
45  
46  
47  
48  
49  
50  
51  
52  
53  
54  
55  
56  
57  
58  
59  
60

**Figure 1: Lung cancer mortality compared with mortality from other causes of malignant neoplasms, 2020**  
**Male**

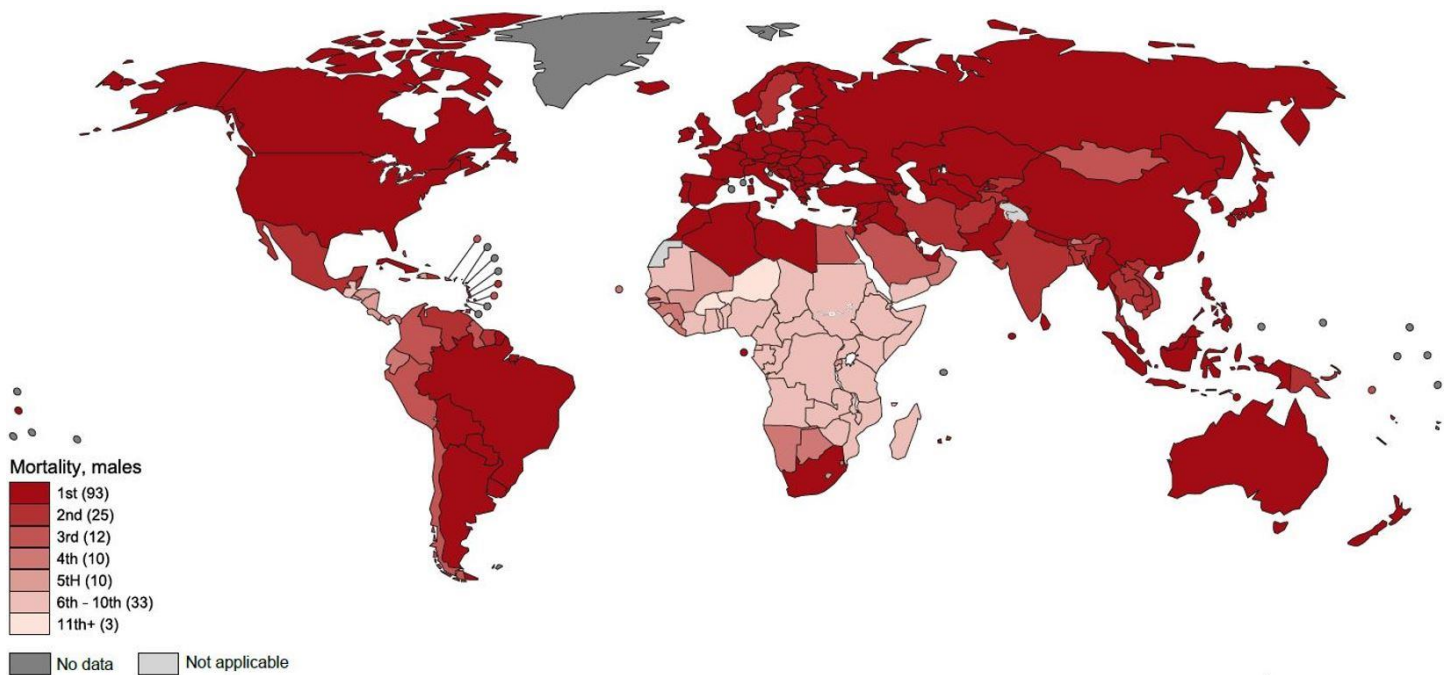

**Female**

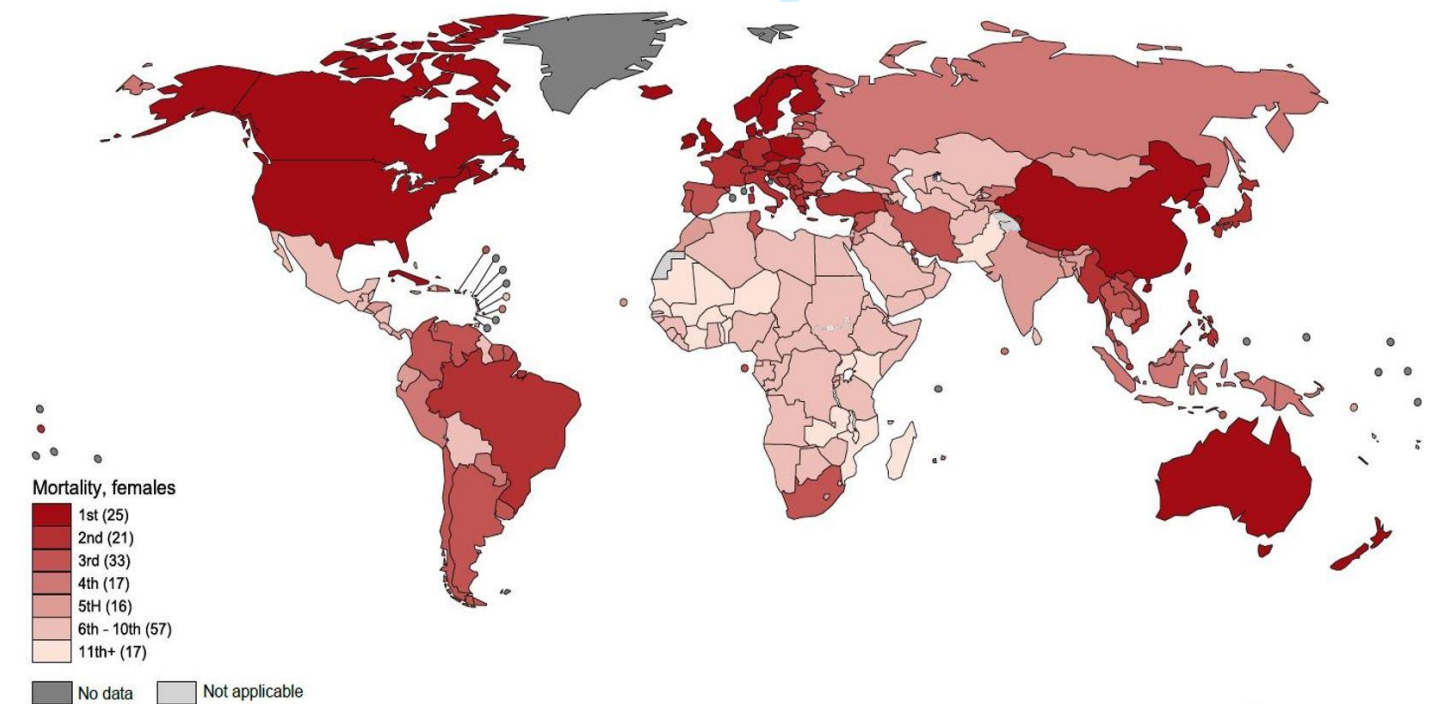

**Figure 2: Lung cancer age-standardized mortality rates per 100,000 by world regions and sex in 2020**

Lung cancer

Age-standardized (W) mortality rate per 100000, males

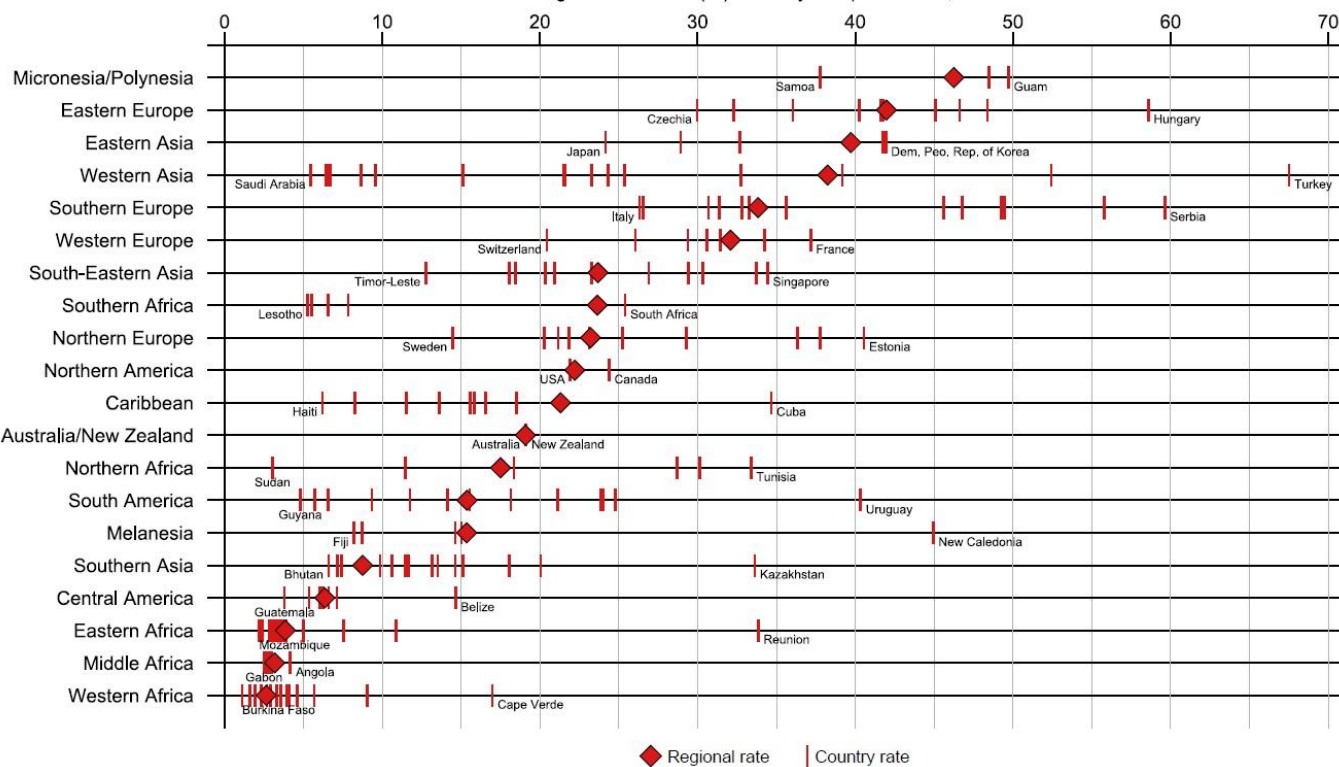

Lung cancer

Age-standardized (W) mortality rate per 100000, females

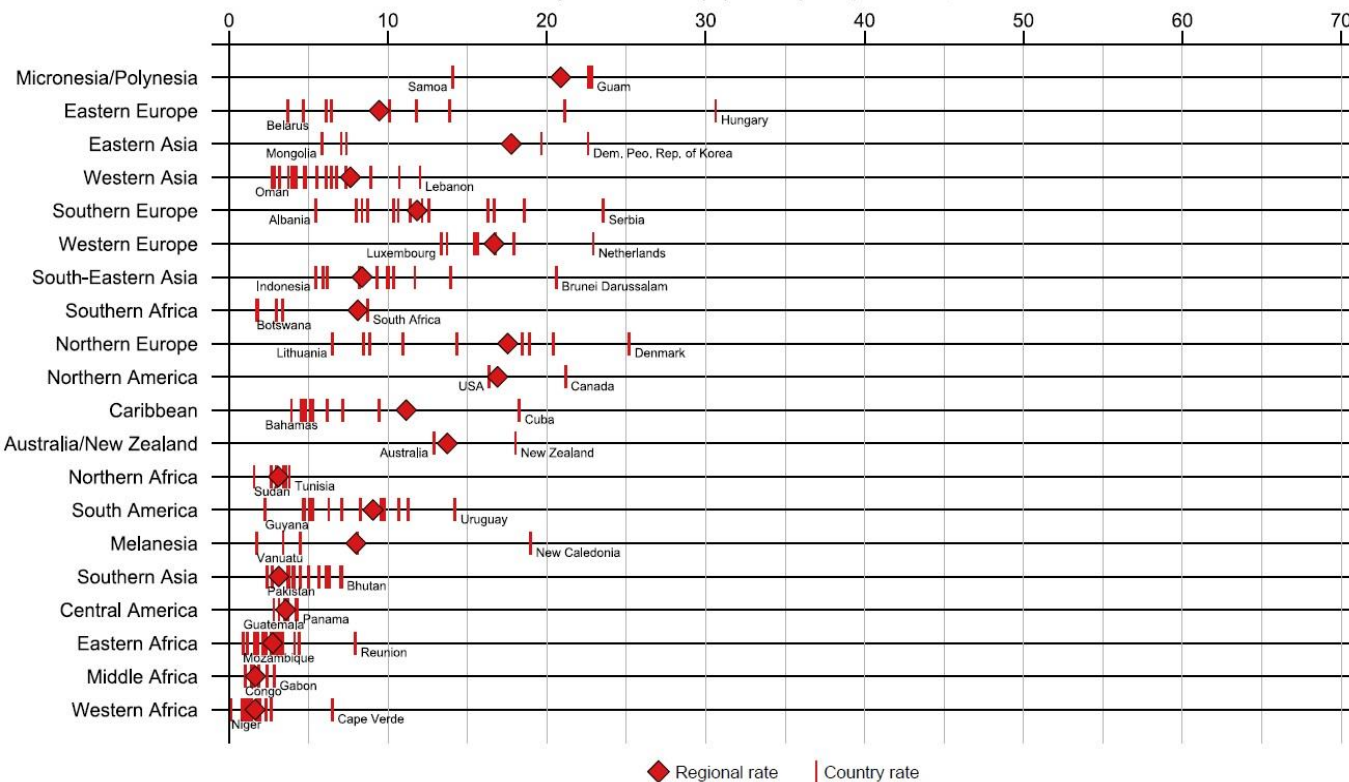

**Figure 3: Lung cancer mortality projections worldwide from 2020 to 2040 by sex and the Human Development Index (HDI)**

**Lung cancer mortality by sex**

**A**



**B**

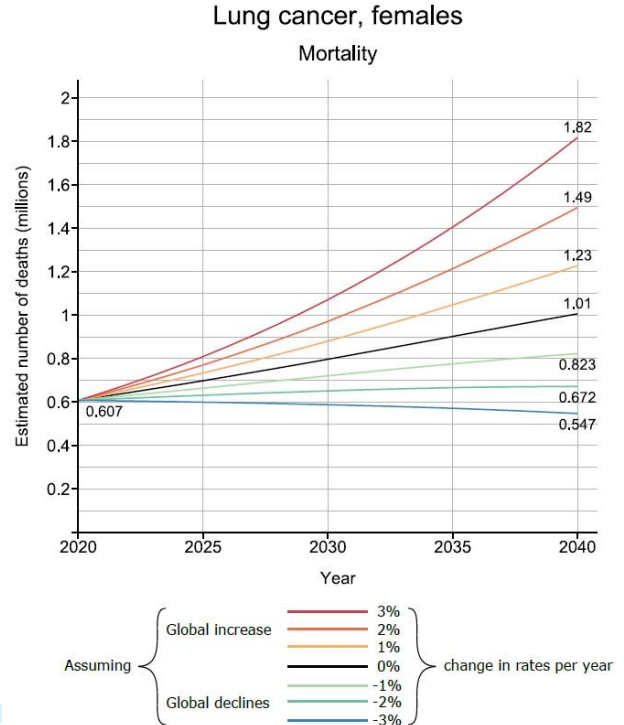

view only

Supplemental material - Appendix

**Figure 1: Lung cancer mortality compared with mortality from other causes of malignant neoplasms, 2020, Male - Female**

The boundaries and names shown and the designations used on this map do not imply the expression of any opinion whatsoever on the part of the World Health Organization concerning the legal status of any country, territory, city or area or of its authorities, or concerning the delimitation of its frontiers or boundaries. Dotted and dashed lines on maps represent approximate border lines for which there may not yet be full agreement.

Data source: Globocan 2020, Map production: CSU, World Health Organization

Ferlay J, Ervik M, Lam F, Colombet M, Mery L, Piñeros M, Znaor A, Soerjomataram I, Bray F (2020). Global Cancer Observatory: Cancer Today. Lyon, France: International Agency for Research on Cancer. Available from: <https://gco.iarc.fr/today>, accessed [13 April 2022].

Appendices

Lung cancer mortality by sex - very high HDI countries

A

B





**Lung cancer mortality by sex - high HDI countries**

**C**



**D**



**Lung cancer mortality by sex - medium HDI countries**

**E**



**F**



Lung cancer mortality by sex - low HDI countries

G

H



Review only

## STROBE Statement—checklist of items that should be included in reports of observational studies

|                              | Item No                                                                                                                                                                                                                                                                                                   | Recommendation                                                                                                                                                                                                                                                                                                                                                                                                                                                         | Page No |
|------------------------------|-----------------------------------------------------------------------------------------------------------------------------------------------------------------------------------------------------------------------------------------------------------------------------------------------------------|------------------------------------------------------------------------------------------------------------------------------------------------------------------------------------------------------------------------------------------------------------------------------------------------------------------------------------------------------------------------------------------------------------------------------------------------------------------------|---------|
| <b>Title and abstract</b>    | 1                                                                                                                                                                                                                                                                                                         | (a) Indicate the study's design with a commonly used term in the title or the abstract                                                                                                                                                                                                                                                                                                                                                                                 | 1       |
|                              |                                                                                                                                                                                                                                                                                                           | (b) Provide in the abstract an informative and balanced summary of what was done and what was found                                                                                                                                                                                                                                                                                                                                                                    | 2       |
| <b>Introduction</b>          |                                                                                                                                                                                                                                                                                                           |                                                                                                                                                                                                                                                                                                                                                                                                                                                                        |         |
| Background/rationale         | 2                                                                                                                                                                                                                                                                                                         | Explain the scientific background and rationale for the investigation being reported                                                                                                                                                                                                                                                                                                                                                                                   | 4       |
| Objectives                   | 3                                                                                                                                                                                                                                                                                                         | State specific objectives, including any prespecified hypotheses                                                                                                                                                                                                                                                                                                                                                                                                       | 4       |
| <b>Methods</b>               |                                                                                                                                                                                                                                                                                                           |                                                                                                                                                                                                                                                                                                                                                                                                                                                                        |         |
| Study design                 | 4                                                                                                                                                                                                                                                                                                         | Present key elements of study design early in the paper                                                                                                                                                                                                                                                                                                                                                                                                                | 4       |
| Setting                      | 5                                                                                                                                                                                                                                                                                                         | Describe the setting, locations, and relevant dates, including periods of recruitment, exposure, follow-up, and data collection                                                                                                                                                                                                                                                                                                                                        | 4       |
| Participants                 | 6                                                                                                                                                                                                                                                                                                         | (a) <i>Cohort study</i> —Give the eligibility criteria, and the sources and methods of selection of participants. Describe methods of follow-up<br><i>Case-control study</i> —Give the eligibility criteria, and the sources and methods of case ascertainment and control selection. Give the rationale for the choice of cases and controls<br><i>Cross-sectional study</i> —Give the eligibility criteria, and the sources and methods of selection of participants | 4       |
|                              |                                                                                                                                                                                                                                                                                                           | (b) <i>Cohort study</i> —For matched studies, give matching criteria and number of exposed and unexposed<br><i>Case-control study</i> —For matched studies, give matching criteria and the number of controls per case                                                                                                                                                                                                                                                 | 4       |
| Variables                    | 7                                                                                                                                                                                                                                                                                                         | Clearly define all outcomes, exposures, predictors, potential confounders, and effect modifiers. Give diagnostic criteria, if applicable                                                                                                                                                                                                                                                                                                                               | 6       |
| Data sources/<br>measurement | 8*                                                                                                                                                                                                                                                                                                        | For each variable of interest, give sources of data and details of methods of assessment (measurement). Describe comparability of assessment methods if there is more than one group                                                                                                                                                                                                                                                                                   | 4       |
| Bias                         | 9                                                                                                                                                                                                                                                                                                         | Describe any efforts to address potential sources of bias                                                                                                                                                                                                                                                                                                                                                                                                              | 7       |
| Study size                   | 10                                                                                                                                                                                                                                                                                                        | Explain how the study size was arrived at                                                                                                                                                                                                                                                                                                                                                                                                                              |         |
| Quantitative variables       | 11                                                                                                                                                                                                                                                                                                        | Explain how quantitative variables were handled in the analyses. If applicable, describe which groupings were chosen and why                                                                                                                                                                                                                                                                                                                                           | 4       |
| Statistical methods          | 12                                                                                                                                                                                                                                                                                                        | (a) Describe all statistical methods, including those used to control for confounding                                                                                                                                                                                                                                                                                                                                                                                  | 4       |
|                              |                                                                                                                                                                                                                                                                                                           | (b) Describe any methods used to examine subgroups and interactions                                                                                                                                                                                                                                                                                                                                                                                                    | 4       |
|                              | (c) Explain how missing data were addressed                                                                                                                                                                                                                                                               | 7                                                                                                                                                                                                                                                                                                                                                                                                                                                                      |         |
|                              | (d) <i>Cohort study</i> —If applicable, explain how loss to follow-up was addressed<br><i>Case-control study</i> —If applicable, explain how matching of cases and controls was addressed<br><i>Cross-sectional study</i> —If applicable, describe analytical methods taking account of sampling strategy | 4                                                                                                                                                                                                                                                                                                                                                                                                                                                                      |         |
|                              | (e) Describe any sensitivity analyses                                                                                                                                                                                                                                                                     | -                                                                                                                                                                                                                                                                                                                                                                                                                                                                      |         |

Continued on next page

| <b>Results</b>           |     |                                                                                                                                                                                                              |   |
|--------------------------|-----|--------------------------------------------------------------------------------------------------------------------------------------------------------------------------------------------------------------|---|
| Participants             | 13* | (a) Report numbers of individuals at each stage of study—eg numbers potentially eligible, examined for eligibility, confirmed eligible, included in the study, completing follow-up, and analysed            | - |
|                          |     | (b) Give reasons for non-participation at each stage                                                                                                                                                         | 4 |
|                          |     | (c) Consider use of a flow diagram                                                                                                                                                                           |   |
| Descriptive data         | 14* | (a) Give characteristics of study participants (eg demographic, clinical, social) and information on exposures and potential confounders                                                                     | 4 |
|                          |     | (b) Indicate number of participants with missing data for each variable of interest                                                                                                                          | - |
|                          |     | (c) <i>Cohort study</i> —Summarise follow-up time (eg, average and total amount)                                                                                                                             | - |
| Outcome data             | 15* | <i>Cohort study</i> —Report numbers of outcome events or summary measures over time                                                                                                                          | - |
|                          |     | <i>Case-control study</i> —Report numbers in each exposure category, or summary measures of exposure                                                                                                         | - |
|                          |     | <i>Cross-sectional study</i> —Report numbers of outcome events or summary measures                                                                                                                           | 5 |
| Main results             | 16  | (a) Give unadjusted estimates and, if applicable, confounder-adjusted estimates and their precision (eg, 95% confidence interval). Make clear which confounders were adjusted for and why they were included | 5 |
|                          |     | (b) Report category boundaries when continuous variables were categorized                                                                                                                                    | - |
|                          |     | (c) If relevant, consider translating estimates of relative risk into absolute risk for a meaningful time period                                                                                             | - |
| Other analyses           | 17  | Report other analyses done—eg analyses of subgroups and interactions, and sensitivity analyses                                                                                                               | 6 |
| <b>Discussion</b>        |     |                                                                                                                                                                                                              |   |
| Key results              | 18  | Summarise key results with reference to study objectives                                                                                                                                                     | 6 |
| Limitations              | 19  | Discuss limitations of the study, taking into account sources of potential bias or imprecision. Discuss both direction and magnitude of any potential bias                                                   | 7 |
| Interpretation           | 20  | Give a cautious overall interpretation of results considering objectives, limitations, multiplicity of analyses, results from similar studies, and other relevant evidence                                   | 6 |
| Generalisability         | 21  | Discuss the generalisability (external validity) of the study results                                                                                                                                        | 6 |
| <b>Other information</b> |     |                                                                                                                                                                                                              |   |
| Funding                  | 22  | Give the source of funding and the role of the funders for the present study and, if applicable, for the original study on which the present article is based                                                | 8 |

\*Give information separately for cases and controls in case-control studies and, if applicable, for exposed and unexposed groups in cohort and cross-sectional studies.

**Note:** An Explanation and Elaboration article discusses each checklist item and gives methodological background and published examples of transparent reporting. The STROBE checklist is best used in conjunction with this article (freely available on the Web sites of PLoS Medicine at <http://www.plosmedicine.org/>, Annals of Internal Medicine at <http://www.annals.org/>, and Epidemiology at <http://www.epidem.com/>). Information on the STROBE Initiative is available at [www.strobe-statement.org](http://www.strobe-statement.org).

# BMJ Open

## Lung cancer mortality in the wake of the changing smoking epidemic: a descriptive study of the global burden in 2020 and 2040.

|                                 |                                                                                                                                                                                                                                                                                                                                                                                                                                                                                                                                                                                                                                                                                                                                                                                                                                                                                                                                                                                                                                                                                         |
|---------------------------------|-----------------------------------------------------------------------------------------------------------------------------------------------------------------------------------------------------------------------------------------------------------------------------------------------------------------------------------------------------------------------------------------------------------------------------------------------------------------------------------------------------------------------------------------------------------------------------------------------------------------------------------------------------------------------------------------------------------------------------------------------------------------------------------------------------------------------------------------------------------------------------------------------------------------------------------------------------------------------------------------------------------------------------------------------------------------------------------------|
| Journal:                        | <i>BMJ Open</i>                                                                                                                                                                                                                                                                                                                                                                                                                                                                                                                                                                                                                                                                                                                                                                                                                                                                                                                                                                                                                                                                         |
| Manuscript ID                   | bmjopen-2022-065303.R3                                                                                                                                                                                                                                                                                                                                                                                                                                                                                                                                                                                                                                                                                                                                                                                                                                                                                                                                                                                                                                                                  |
| Article Type:                   | Original research                                                                                                                                                                                                                                                                                                                                                                                                                                                                                                                                                                                                                                                                                                                                                                                                                                                                                                                                                                                                                                                                       |
| Date Submitted by the Author:   | 03-Mar-2023                                                                                                                                                                                                                                                                                                                                                                                                                                                                                                                                                                                                                                                                                                                                                                                                                                                                                                                                                                                                                                                                             |
| Complete List of Authors:       | Weber, Andras; International Agency for Research on Cancer, Cancer Surveillance Branch; National Institute of Oncology, Hungarian National Cancer Registry<br>Morgan, Eileen; International Agency for Research on Cancer<br>Vignat, Jerome; International Agency for Research on Cancer<br>Laversanne, Mathieu; International Agency for Research on Cancer, Cancer Surveillance Branch<br>Pizzato, Margherita; International Agency for Research on Cancer; University of Milan, Department of Clinical Sciences and Community Health<br>Rumgay, Harriet; International Agency for Research on Cancer<br>Singh, Deependra; International Agency for Research on Cancer<br>Nagy, Péter; National Institute of Oncology, Department of Molecular Immunology and Toxicology; University of Veterinary Medicine, Department of Anatomy and Histology<br>Kenessey, István; National Institute of Oncology; Semmelweis University, Department of Pathology, Forensic and Insurance Medicine<br>Soerjomataram, Isabelle; WHO<br>Bray, Freddie; Int Agcy Res Canc, Cancer Surveillance Branch |
| <b>Primary Subject Heading</b>: | Epidemiology                                                                                                                                                                                                                                                                                                                                                                                                                                                                                                                                                                                                                                                                                                                                                                                                                                                                                                                                                                                                                                                                            |
| Secondary Subject Heading:      | Epidemiology, Global health, Health policy, Oncology, Public health                                                                                                                                                                                                                                                                                                                                                                                                                                                                                                                                                                                                                                                                                                                                                                                                                                                                                                                                                                                                                     |
| Keywords:                       | Epidemiology < TROPICAL MEDICINE, Health policy < HEALTH SERVICES ADMINISTRATION & MANAGEMENT, PUBLIC HEALTH, EPIDEMIOLOGY, Epidemiology < INFECTIOUS DISEASES                                                                                                                                                                                                                                                                                                                                                                                                                                                                                                                                                                                                                                                                                                                                                                                                                                                                                                                          |
|                                 |                                                                                                                                                                                                                                                                                                                                                                                                                                                                                                                                                                                                                                                                                                                                                                                                                                                                                                                                                                                                                                                                                         |

SCHOLARONE™  
Manuscripts



I, the Submitting Author has the right to grant and does grant on behalf of all authors of the Work (as defined in the below author licence), an exclusive licence and/or a non-exclusive licence for contributions from authors who are: i) UK Crown employees; ii) where BMJ has agreed a CC-BY licence shall apply, and/or iii) in accordance with the terms applicable for US Federal Government officers or employees acting as part of their official duties; on a worldwide, perpetual, irrevocable, royalty-free basis to BMJ Publishing Group Ltd ("BMJ") its licensees and where the relevant Journal is co-owned by BMJ to the co-owners of the Journal, to publish the Work in this journal and any other BMJ products and to exploit all rights, as set out in our [licence](#).

The Submitting Author accepts and understands that any supply made under these terms is made by BMJ to the Submitting Author unless you are acting as an employee on behalf of your employer or a postgraduate student of an affiliated institution which is paying any applicable article publishing charge ("APC") for Open Access articles. Where the Submitting Author wishes to make the Work available on an Open Access basis (and intends to pay the relevant APC), the terms of reuse of such Open Access shall be governed by a Creative Commons licence – details of these licences and which [Creative Commons](#) licence will apply to this Work are set out in our licence referred to above.

Other than as permitted in any relevant BMJ Author's Self Archiving Policies, I confirm this Work has not been accepted for publication elsewhere, is not being considered for publication elsewhere and does not duplicate material already published. I confirm all authors consent to publication of this Work and authorise the granting of this licence.

1  
2  
3 **1 Lung cancer mortality in the wake of the changing smoking epidemic: a descriptive study of the**  
4 **2 global burden in 2020 and 2040**

6  
7 3 András Wéber PhD<sup>1,2</sup>, Eileen Morgan PhD<sup>1</sup>, Jerome Vignat MSc<sup>1</sup>, Mathieu Laversanne  
8 MSc<sup>1</sup>, Margherita Pizzato PhD<sup>1,3</sup>, Harriet Rungay PhD<sup>1</sup>, Deependra Singh PhD<sup>1</sup>, Péter Nagy DSc<sup>4</sup>,  
9 István Kenessey MD PhD<sup>2</sup>, Isabelle Soerjomataram PhD<sup>1</sup>, Freddie Bray PhD<sup>1</sup>  
10  
11  
12

13  
14  
15  
16 7 <sup>1</sup> Cancer Surveillance Branch, International Agency for Research on Cancer, Lyon, France

17  
18 8 <sup>2</sup> Hungarian National Cancer Registry and National Tumorbiology Laboratory, National Institute of  
19 Oncology, Budapest, Hungary

20  
21  
22 10 <sup>3</sup> Department of Clinical Sciences and Community Health, University of Milan, Milan, Italy.

23  
24 11 <sup>4</sup> Department of Molecular Immunology and Toxicology and National Tumorbiology Laboratory,  
25 National Institute of Oncology, Budapest, Hungary  
26  
27  
28

29  
30 13

31  
32 14

33  
34 15

35  
36 16

37  
38 17

39  
40 18

41  
42 19

43  
44  
45  
46  
47  
48  
49 20 Corresponding author:

50 21 András Wéber

51 22 Cancer Surveillance Branch  
52 23 International Agency for Research on Cancer  
53 24 email: andrasvonweber@gmail.com  
54 25

55 26  
56 27  
57 28 Hungarian National Cancer Registry  
58 29 National Institute of Oncology  
59 30

1  
2  
3 31 **Abstract**

4 32  
5 33 *Objectives*

6 34  
7 35 Lung cancer is the leading cause of cancer death in 2020, responsible for almost one in five  
8  
9 36 (18.0%) deaths. This paper provides an overview of the descriptive epidemiology of lung cancer based  
10  
11 37 on national mortality estimates for 2020 from the International Agency for Research on Cancer (IARC),  
12  
13 38 and in the context of recent tobacco control policies.

14 39  
15 40 *Design and setting*

16 41  
17 42 For this descriptive study age-standardized mortality rates per 100,000 person-years of lung  
18  
19 43 cancer for 185 countries by sex were obtained from the GLOBOCAN 2020 database and stratified by  
20  
21 44 Human Development Index (HDI). Lung cancer deaths were projected to 2040 based on demographic  
22  
23 45 changes alongside scenarios of annually increasing, stable or decreasing rates from the baseline year of  
24  
25 46 2020.

26 47  
27 48 *Results*

28 49  
29 50 Lung cancer mortality rates exhibited marked variations by geography and sex. Low HDI  
30  
31 51 countries, many of them within sub-Saharan Africa, tend to have low levels of mortality and an upward  
32  
33 52 trend in lung cancer deaths is predicted for both sexes until 2040 according to demographic projections,  
34  
35 53 irrespective of trends in rates. In very high HDI countries, including Europe, Northern America and  
36  
37 54 Australia/New Zealand, there are broadly decreasing trends in men whereas in women, rates are still  
38  
39 55 increasing or reaching a plateau.

40 56  
41 57 *Conclusion*

42 58  
43 59 The current and future burden of lung cancer in a country or region largely depends on the  
44  
45 60 present trajectory of the smoking epidemic in its constituent populations, with distinct gender differences  
46  
47 61 in smoking patterns, both in transitioning and transitioned countries. Further elevations in lung cancer  
48  
49 62 mortality are expected worldwide, raising important social and political questions, especially in low-  
50  
51 63 and middle-income countries.

52 64  
53 65  
54 66 **Keywords:** lung cancer, mortality, projection

55 67  
56 68 **Word count of abstract:** 257

57 69  
58 70 **Word count of article:** 2623  
59  
60



1  
2  
3 71 **Strengths and limitations of this study**  
4 72  
5 73  
6  
7 74

- 8 75 • This study presents a detailed profile of the present LC burden in men and women worldwide  
9 76 according to national levels of human development.  
10 76  
11  
12 77 • Our research applies a simple projection to estimate the future lung cancer mortality burden in  
13 78 2040.  
14 78  
15 79  
16 79  
17 80 • We discuss the results in the context of key risk factors for lung cancer, particularly the  
18 81 continually evolving smoking epidemic.  
19 81  
20 82  
21 82  
22 83 • This examination is hampered by the limited availability of local cause of death information  
23 84 from national vital registration sources, particularly in transitioning countries.  
24 84  
25 85  
26 85  
27 86  
28 86  
29 87  
30 87  
31 88  
32 88  
33 89  
34  
35  
36  
37  
38  
39  
40  
41  
42  
43  
44  
45  
46  
47  
48  
49  
50  
51  
52  
53  
54  
55  
56  
57  
58  
59  
60

## 90 **Introduction**

91 Lung cancer (LC) ranks as the most frequent form of cancer death and premature cancer mortality  
92 (ages 30-69) with uniformly low 5-year survival, even in high-income countries [1]. With one-fifth of  
93 the present cancer mortality worldwide due to LC – an estimated 1.8 million deaths in 2020 [2] – the  
94 key determinant remains tobacco consumption. Up to 9 in 10 LC cases are caused by smoking in high-  
95 income settings, while mortality increases with number of cigarettes smoked and smoking duration [3].  
96 Lopez et al. drew attention to the phases of the global smoking epidemic and the subsequent impact of  
97 smoking on LC occurrence by sex [4]; men and women remain in very different phases of the smoking  
98 epidemic, as reflected in disease rates by birth cohort. Recent reports have generally described marked  
99 variations in rates between sexes, with stable or decreasing rates found predominantly among male while  
100 increasing rates among female populations [5,6].

101 An emerging pattern is a higher rate of LC incidence among young females than males across  
102 geographic areas and income levels, that is not fully explained by sex-specific differences in smoking  
103 prevalence [7]. Such temporal patterns forewarn of a higher LC burden in women than men at older ages  
104 in decades to follow, especially in higher-income settings. Women have been increasingly targeted in  
105 marketing campaigns, particularly in transitioning countries, while social constraints that precluded  
106 women taking up the habit are weakening [8]; still, smoking prevalence among women varies markedly,  
107 for example, a small proportion of women in China are current smokers, in absolute terms and relative  
108 to men [9].

109 This paper presents a global overview of the descriptive epidemiology of LC in relation to recent  
110 tobacco control policies, using the GLOBOCAN mortality estimates for the year 2020 provided by the  
111 International Agency for Research on Cancer (IARC) [10]. In addition, we provide projections of the  
112 future mortality burden according to different temporal scenarios to the year 2040, estimating the  
113 expected future LC deaths according to levels of Human Development Index (HDI).

114

## 115 **Data Sources and Methods**

116 The number of deaths from, cancers of the lung (ICD-10 C33-34, including trachea and bronchus)  
117 were extracted from IARC's GLOBOCAN 2020 database for 185 countries or territories, by sex and 18  
118 age groups (0-4, 5-9, ..., 80-84, 85 and over) [2,10,11]. Corresponding population data for 2020 were  
119 extracted from the United Nations (UN) website [12]. The data sources and hierarchy of methods used  
120 in compiling the cancer estimates have been described in detail elsewhere [10]. In brief, the  
121 GLOBOCAN estimates are assembled at the national level using the best available sources of cancer  
122 incidence and mortality data within a given country. The methods used to derive the 2020 estimates  
123 corresponding to those used to derived for previous years [13,14,15] where applicable, priority is given

1  
2  
3 124 to short-term predictions and modelled mortality to incidence (M:I) ratios, while validity is dependent  
4  
5 125 on the degree of representativeness and quality of the source information [10].

6 126 We present figures based on the estimated deaths in 2020, as well as two summary measures using  
7  
8 127 direct standardization, namely the age-standardized mortality rate (ASR) per 100,000 person-years  
9  
10 128 based on the 1966 Segi-Doll World standard population [16,17] and the cumulative risk of dying from  
11  
12 129 cancer before the age of 75 expressed as a percentage, assuming the absence of competing causes of  
13  
14 130 death [18]. These measures allow comparisons between populations adjusted for differences in age  
15  
16 131 structures. We also provide a prediction of the future number of LC deaths worldwide for the year 2040,  
17  
18 132 based on demographic projections and scenarios of uniformly increasing (+3%, +2%, +1%), stable (0%)  
19  
20 133 or decreasing (-1%, -2%, -3%) rates annually from the baseline year of 2020. The possible impact of  
21  
22 134 COVID-19 pandemic was not taken into consideration during the calculations.

23  
24 135 The results are presented by country and aggregated across 20 UN-defined world regions [12] and  
25  
26 136 according to the UN's four-tier HDI in 2020 [19], as a means to assess the cancer burden across four  
27  
28 137 levels of development (low, medium, high and very high HDI). Throughout, we use the terms  
29  
30 138 *transitioning*, *emerging* and *lower HDI* countries/economies as synonyms for nations classified as low  
31  
32 139 or medium HDI, and *transitioned* or *higher HDI* countries/economies for those classified as high or very  
33  
34 140 high HDI.

35  
36 141 The Global Cancer Observatory (GCO, <https://gco.iarc.fr>) includes facilities for the tabulation  
37  
38 142 and graphical visualization of the GLOBOCAN database, including explorations of the current [2] and  
39  
40 143 future [20] burden for 36 cancer types.

41  
42 144 Patient and Public Involvement: Patients or the public were not involved in the design, or  
43  
44 145 conduct, or reporting, or dissemination plans of our research.

45  
46 146

## 47 48 147 **Results**

### 49 50 148 *Lung cancer mortality – national rankings 2020*

51  
52 149 Figure 1 presents global maps that indicate LC's position in terms of deaths relative to other  
53  
54 150 common tumours at the national level, by sex for the year 2020. In 2020, LC ranks first in terms of  
55  
56 151 cancer death in half (93 out of 185) of the countries included in GLOBOCAN, and either 2<sup>nd</sup> or 3<sup>rd</sup> in 37  
57  
58 152 countries, in men. LC is a major contributor to cancer mortality around the world, including America,  
59  
60 153 greater-Europe, Northern Africa, and across the Asian-Pacific region. There is a less dominant role at  
154  
155 154 present in South America and Sub-Saharan Africa (but not South Africa). In women, the impact is lesser  
156  
157 155 but still very much in evidence; the disease ranks as the leading form of cancer death in 25 countries  
158  
159 156 including those within North America, Northern, Western and Southern-Central Europe, Eastern Asia  
160  
157 and Australia/New Zealand. LC mortality ranks as the 2<sup>nd</sup> or 3<sup>rd</sup> leading form of cancer mortality in 54  
158  
159 158 countries worldwide in women.

1  
2  
3 159 There is at least a 20-fold variation in mortality between the sexes, with rates uniformly higher  
4 160 among men (Figure 2). Male mortality rates are higher in Eastern and Southern Europe (especially in  
5 161 Hungary and Serbia with rates of 60 per 100,000), Eastern Asia (particularly the Democratic People's  
6 162 Republic of Korea) and Polynesia and Micronesia, while rates are lower in Central America, South-  
7 163 Central Asia and most parts of sub-Saharan Africa. The highest female rates are observed in Northern  
8 164 America, Northern and Western Europe, and Australia/New Zealand specifically in Canada, Denmark  
9 165 and the Netherlands, respectively. Relatively low rates are observed in Western-, South-Eastern Asia  
10 166 and across the African continent, excluding South Africa.

#### 167 *Lung cancer mortality burden by 2040*

168 If the current rates were to remain constant over the next two decades, LC will claim around 2  
169 million male deaths in 2040, compared to 1.2 million in 2020 (Figure 3). For women, the corresponding  
170 deaths are approximately half of their male counterparts: a predicted increase to 1 million in 2040 from  
171 600 000 deaths in 2020. The projection also shows the different scenarios considering the changing rates  
172 per year between -3% and +3% based on plausible scenarios of the smoking epidemic in the short-term  
173 future; global declines in the number of LC among males but increases for female are perhaps the more  
174 realistic scenarios, with national or regional exceptions. Taking this trends-based prediction into  
175 account, the predicted number of deaths due to LC for men will likely range between 1.1 and 1.6 million  
176 and for women between 1.2 and 1.8 million by 2040. Deaths will markedly increase for both sexes in  
177 countries with the lowest HDI, even in the best-case trend scenario (Appendix Figure 1a-h).

## 179 **Discussion**

180 This study highlights the present geographic diversity in LC mortality worldwide, by sex and by  
181 level of human development. Countries with low HDI tend to have low LC mortality rates but may  
182 anticipate a higher mortality burden by 2040. For higher HDI countries, the burden of the disease is  
183 higher among men, but future trends suggest an increasingly greater proportion of the cancer burden  
184 will be seen among females. These different scenarios are due to the impact of historic smoking trends  
185 and the increasingly widespread application of tobacco control measures in the last decades [21]. While  
186 there is an expectation that LC mortality will increase in transitioning countries given there is less  
187 implementation of effective tobacco control, there is a positivity in the findings from the Global Tobacco  
188 Control Report: the number of people now living in countries with at least two anti-tobacco policies in  
189 place rose from 3.5 billion in 2018 to 4.4 billion in 2020 – up from 45% of the world's population to  
190 56% in two years [22].

191 Past smoking histories of nations are a key determinant of the current magnitude of LC in many  
192 populations worldwide, as described by the classical model of the global smoking epidemic, first  
193 introduced by Lopez et al [4]. In the model, the effect of different smoking patterns was captured by four

1  
2  
3 194 stages in the population, by an earlier adoption of the habit in men compared with women, and by the  
4  
5 195 progressive adoption among lower socioeconomic classes, where the habit continues to be an underlying  
6  
7 196 cause of the marked inequalities seen in different educational groups [23]. Lopez et al. initially applied  
8  
9 197 the hypothesis on just a few developed countries [24], which was later tested on greater geographic  
10  
11 198 scales [25,26]. Nevertheless, as smoking prevalence and subsequent LC rates began to peak and decline  
12  
13 199 among men in many populations over the last decades, a key focus has been the deteriorating public  
14  
15 200 health situation affecting women, where in many settings, rates of LC mortality have continued to rise.  
16  
17 201 This raises several relevant biological, epidemiological and sociological concerns [27], including: the  
18  
19 202 changing distribution of the main histological subtypes of LC over time [28], the extent to which females  
20  
21 203 adopted the habit of smoking and their vulnerability to the tobacco industry [29,30], the impact of such  
22  
23 204 a transition in diminishing gender differences in disease burden worldwide [31] and the effects of  
24  
25 205 different political systems on the health awareness of individuals [32,33]. The impact of these factors is  
26  
27 206 reflected in comparisons of between-country LC mortality rates; for example, the current rate differences  
28  
29 207 in Eastern vs. Northern European countries.

30  
31 208 Smoking is of course not the only risk factor for LC. There is strong evidence of a relation with  
32  
33 209 other factors, including air pollution, climate change [34] and other occupational risk factors such as  
34  
35 210 asbestosis and indoor exposure to cooking fumes etc [35]. The highest exposure to ambient air pollution  
36  
37 211 is the characteristic of mainly countries in transition, where only modest reductions in burden will occur  
38  
39 212 in the most polluted countries unless fine particulate matter (PM 2.5) values are decreased substantially  
40  
41 213 [36].

42  
43 214 Several other studies have aimed to forecast the future lung cancer burden in very high HDI  
44  
45 215 countries e.g., the US [37] and the UK [38] with contradictory findings. While the steeply declining  
46  
47 216 mortality in the US for both sexes until 2040 fits within the framework of the global smoking epidemic,  
48  
49 217 the rising deaths reported in the UK for men and women until 2035 somewhat contradict previous  
50  
51 218 findings. One explanation could be the rapidly ageing population, which can increase the number of  
52  
53 219 these non-standardized figures. Alternatively, these projections do not take into account the changing  
54  
55 220 smoking prevalence in the past as a key determinant of present and future lung cancers. Our  
56  
57 221 GLOBOCAN 2020 forecasts do not consider these either, however, we provide possible scenarios on  
58  
59 222 the basis of uniform increases or decreases in rates that may help provide a realistic overview of the  
60  
223 changing future burden of LC.

224  
225 Another limitation of this study is the large variability in the availability and quality of cancer  
226  
227 mortality data. Most African and some Asian countries suffer from weak mortality statistics systems. In  
228  
229 GLOBOCAN, in countries where mortality series were not available from national vital registration  
230  
231 sources, the predominant means of the estimation of rates were from corresponding national incidence

1  
2  
3 228 estimates via modelling, using incidence-to-mortality ratios derived from cancer registries in  
4 229 neighbouring countries.

6  
7 230 With over three million deaths predicted by 2040 in the absence of additional interventions  
8 231 according to the finding of this study, it is imperative to emphasize primary prevention as the most cost-  
9 232 effective strategy of tobacco control. It has been shown that raising the price of cigarettes through  
11 233 increased excise taxes can bring marked reductions in cigarette consumption [39]. Besides this,  
13 234 developing adaptive tobacco control strategies that target different subgroups is imperative.

15 235 One key concern is the limited financial and trained resources in middle- and lower-income  
16 236 countries, that can hinder health promotion and cancer prevention strategies in these countries. Based  
17 237 on our findings, decreases in lung cancer rates are not likely in these countries until 2040 and presumably  
19 238 tobacco companies are expected to shift and escalate promotional campaigns to preserve business  
21 239 interests and profits where resistance efforts are the weakest [30].

23  
24 240 Additionally, anti-tobacco strategies should urgently target women in also higher-income settings  
25 241 such as the EU, in order to halt their rapidly increasing risk of LC, and prevent unnecessary, premature  
26 242 deaths among future generations of women [40]. In Sweden, as an example, gender-specific policies  
27 243 such as those directed at health promotion have been implemented with a focus on young and pregnant  
28 244 women. Scotland also has gender-specific programs, such as the Women, Low Income, and Smoking  
29 245 Project [41]. Amos and Haglund (2000) have emphasized that building support for female-centered  
30 246 tobacco control programs through partnerships will be vital to achieve success [30]. Furthermore, Amos  
31 247 (1996) and Mackay and Amos (2003) draw attention to the situation of women in transitioning countries  
32 248 with presently low levels of cigarette smoking among women [29]. In these countries, smoking among  
33 249 girls is already on the rise, women's spending power is increasing, cigarettes are becoming affordable,  
34 250 and women are more exposed to the marketing strategies of tobacco companies, in an environment  
35 251 where cultural constraints are weakening and female-specific quitting programs are rare [8].

36  
37  
38  
39  
40  
41  
42  
43 252 A package of measures to suppress tobacco consumption in a given population has been  
44 253 recommended through continued efforts to increase the proportion of ex-smokers, with a focus on  
45 254 younger generations [42]. This could perhaps be achieved by implementing coordinated smoking  
46 255 prevention and control strategies from an early age, in the form of educational programs in schools.  
47 256 Other measures that could be introduced include community intervention programs, mass media  
48 257 campaigns and further legislation to ban smoking in public places. One of the main problems is that  
49 258 young people react very differently to anti-smoking messages compared to adult long-term smokers  
50 259 [42]. The harm-reducing role of e-cigarettes and aid to smoking cessation has been proposed [43],  
51 260 however their impact on future LC mortality is not yet known [44]. Successful programs have also been  
52 261 implemented in rapidly emerging economies such as Brazil, where a reduction in smoking prevalence  
53 262 were observed after the ratification of the WHO Framework Convention on Tobacco Control (FCTC)

1  
2  
3 263 in 2005, and the adoption of a national ban on tobacco advertising, a national comprehensive smoke-  
4 264 free policy, large pictorial health warnings on cigarette packages, and continuous increases in taxes and  
5 265 prices of tobacco products [45]. Other factors may influence the future burden of LC such as the potential  
6 266 introduction of screening in high-risk populations. In a recent trial, LC mortality was significantly lower  
7 267 among those who underwent volume computed tomography (CT) screening than those who did not  
8 268 participate [46]. Screened patients benefitted from a substantial shift to lower-stage cancers at the time  
9 269 of diagnosis as well as more frequent eligibility for curative treatment (mainly surgery) [47]. However,  
10 270 concerns have been raised about the potential for overdiagnosis in lung-cancer screening.

11 271 In summary, this paper has identified marked geographic variations in the current LC burden  
12 272 worldwide and provided potential scenarios regarding the short-term future LC deaths up until 2040.  
13 273 Gredner et al., have illustrated the great potential of comprehensive implementation of tobacco control  
14 274 policies in Greater-Europe, with over 1.6 million LC cases preventable over a 20-year period through  
15 275 the highest-level implementation of tobacco control policies [48]. There is therefore much we can do to  
16 276 halt the rising deaths from LC – as well as many other forms of cancer and non-communicable diseases  
17 277 – through the successful implementation of tobacco control policies.

18 278

#### 19 279 **Disclosure**

20 280 Where authors are identified as personnel of the International Agency for Research on Cancer/World  
21 281 Health Organization, the authors alone are responsible for the views expressed in this article, and they  
22 282 do not necessarily represent the decisions, policy, or views of the International Agency for Research on  
23 283 Cancer/World Health Organization.

24 284

#### 25 285 **Role of the funding source**

26 286 PN: This study was supported by the Topic Excellence Program (TKP2020-NKA-26, TKP2021-EGA-  
27 287 44), the National Laboratories Program (National Tumor Biology Laboratory-2022-2.1.1-NL-2022-  
28 288 00010), and Tasks Related to the National Public Health Strategy (IV/4925/2021/ EKF).

29 289

#### 30 290 **Authors' contribution**

31 291 AW: literature search, data analysis, writing – original draft; EM: writing – review & editing; JV:  
32 292 figures, visualisation; ML: methodology, figures, visualisation; MP: writing – review & editing; HR:  
33 293 writing – review & editing; DS: writing – review & editing; PN: writing – review & editing, funding  
34 294 acquisition; IK: writing – review & editing; IS: writing – review & editing; FB: methodology,  
35 295 conceptualisation, data analysis, writing – original draft

36 296

#### 37 297 **Declaration of interests**

38 60

298 All authors declare that they have no conflicts of interest.

299

### 300 **Data sharing**

301 Data are available in a public, open access repository.

302

### 303 **Ethics Approval Statement**

304 This study does not involve human participants and animal subjects.

305

### 306 **References**

307 [1] Arnold M, Rutherford MJ, Bardot A, *et al.* Progress in cancer survival, mortality, and incidence in  
308 seven high-income countries 1995–2014 (ICBP SURVMARK-2): a population-based study. *The*  
309 *Lancet Oncology* 2019; **20**: 1493–505.

310 [dataset] [2] Ferlay J, Ervik M, Lam F, Colombet M, Mery L, Piñeros M, Znaor A, Soerjomataram I,  
311 Bray F (2020). Global Cancer Observatory: Cancer Today. Lyon, France: International Agency for  
312 Research on Cancer. Available from: <https://gco.iarc.fr/today>, accessed [13 April 2022].

313 [3] National Center for Chronic Disease Prevention and Health Promotion (US) Office on Smoking  
314 and Health. The Health Consequences of Smoking—50 Years of Progress: A Report of the Surgeon  
315 General. Atlanta (GA): Centers for Disease Control and Prevention (US), 2014  
316 <http://www.ncbi.nlm.nih.gov/books/NBK179276/> (accessed April 14, 2022).

317 [4] Lopez AD, Collishaw NE, Piha T. A descriptive model of the cigarette epidemic in developed  
318 countries. *Tobacco Control* 1994; **3**: 242–7.

319 [5] Bray FI, Weiderpass E. Lung cancer mortality trends in 36 European countries: secular trends and  
320 birth cohort patterns by sex and region 1970-2007. *Int J Cancer* 2010; **126**: 1454–66.

321 [6] Miranda-Filho A, Piñeros M, Bray F. The descriptive epidemiology of lung cancer and tobacco  
322 control: a global overview 2018. *Salud Publica Mex* 2019; **61**: 219–29.

323 [7] Fidler-Benaoudia MM, Torre LA, Bray F, Ferlay J, Jemal A. Lung cancer incidence in young  
324 women vs. young men: A systematic analysis in 40 countries. *International Journal of Cancer* 2020;  
325 **147**: 811–9.

326 [8] Mackay J, Amos A. Women and tobacco. *Respirology* 2003; **8**: 123–30.

327 [9] Sansone N, Yong H-H, Li L, Jiang Y, Fong GT. Perceived acceptability of female smoking in  
328 China: findings from waves 1 to 3 of the ITC China Survey. *Tob Control* 2015; : tobaccocontrol-2015-  
329 052380.

330 [10] Ferlay J, Colombet M, Soerjomataram I, *et al.* Cancer statistics for the year 2020: An overview.  
331 *International Journal of Cancer* 2021; **149**: 778–89.

332 [11] Sung H, Ferlay J, Siegel RL, *et al.* Global Cancer Statistics 2020: GLOBOCAN Estimates of  
333 Incidence and Mortality Worldwide for 36 Cancers in 185 Countries. *CA Cancer J Clin* 2021; **71**:  
334 209–49.

335 [12] UNSD — Methodology. <https://unstats.un.org/unsd/methodology/m49/> (accessed April 15,  
336 2022).



- 1  
2  
3 337 [13] Ferlay J, Colombet M, Soerjomataram I, *et al.* Estimating the global cancer incidence and  
4 338 mortality in 2018: GLOBOCAN sources and methods. *Int J Cancer* 2019; **144**: 1941–53.  
5  
6 339 [14] Ferlay J, Soerjomataram I, Dikshit R, *et al.* Cancer incidence and mortality worldwide: sources,  
7 340 methods and major patterns in GLOBOCAN 2012. *Int J Cancer* 2015; **136**: E359-386.  
8  
9 341 [15] Ferlay J, Shin H-R, Bray F, Forman D, Mathers C, Parkin DM. Estimates of worldwide burden of  
10 342 cancer in 2008: GLOBOCAN 2008. *International Journal of Cancer* 2010; **127**: 2893–917.  
11  
12 343 [16] Cancer Mortality for Selected Sites in 24 Countries (1950–57) – ScienceOpen.  
13 344 <https://www.scienceopen.com/document?vid=d36053cb-ebfe-4b4c-a7ca-05447aa3cd19> (accessed  
14 345 April 15, 2022).  
15  
16 346 [17] Schneiderman MA. Cancer Incidence in Five Continents: A Technical Report: Richard Doll,  
17 347 Peter Payne, and John Waterhouse (eds.). New York: Springer-Verlag, 1966. 244 pp. \$9.50. *Cancer*  
18 348 *Research* 1968; **28**: 804.  
19  
20 349 [18] Day NE. Cancer Incidence in Five Continents. Cumulative rate and cumulative risk. IARC Sci  
21 350 Publ 1992; 862–4.  
22  
23 351 [19] Human Development Reports | United Nations Development Programme. <https://hdr.undp.org/>  
24 352 (accessed April 15, 2022).  
25  
26 353 [dataset] [20] Ferlay J, Laversanne M, Ervik M, Lam F, Colombet M, Mery L, Piñeros M, Znaor A,  
27 354 Soerjomataram I, Bray F (2020). Global Cancer Observatory: Cancer Tomorrow. Lyon, France:  
28 355 International Agency for Research on Cancer. Available from: <https://gco.iarc.fr/tomorrow>, accessed  
29 356 [15 April 2022].  
30  
31 357 [21] Tobacco Atlas. 2022; published online Feb 25. <https://tobaccoatlas.org/> (accessed Sept 9, 2022).  
32  
33 358 [22] Global tobacco report 2021. [https://www.who.int/teams/health-promotion/tobacco-control/global-](https://www.who.int/teams/health-promotion/tobacco-control/global-tobacco-report-2021)  
34 359 [tobacco-report-2021](https://www.who.int/teams/health-promotion/tobacco-control/global-tobacco-report-2021) (accessed Sept 22, 2022).  
35  
36 360 [23] Cavelaars AE, Kunst AE, Geurts JJ, *et al.* Educational differences in smoking: international  
37 361 comparison. *BMJ* 2000; **320**: 1102–7.  
38  
39 362 [24] Thun M, Peto R, Boreham J, Lopez AD. Stages of the cigarette epidemic on entering its second  
40 363 century. *Tobacco Control* 2012; **21**: 96–101.  
41  
42 364 [25] Janssen F, Gewily SE, Bardoutsos A. Smoking epidemic in Europe in the 21st century. *Tobacco*  
43 365 *Control* 2021; **30**: 523–9.  
44  
45 366 [26] Wensink M, Alvarez J-A, Rizzi S, Janssen F, Lindahl-Jacobsen R. Progression of the smoking  
46 367 epidemic in high-income regions and its effects on male-female survival differences: a cohort-by-age  
47 368 analysis of 17 countries. *BMC Public Health* 2020; **20**: 39.  
48  
49 369 [27] Shapiro D. Smoking Tobacco: Irrationality, Addiction, and Paternalism. *Public Affairs Quarterly*  
50 370 1994; **8**: 187–203.  
51  
52 371 [28] Lortet-Tieulent J, Soerjomataram I, Ferlay J, Rutherford M, Weiderpass E, Bray F. International  
53 372 trends in lung cancer incidence by histological subtype: adenocarcinoma stabilizing in men but still  
54 373 increasing in women. *Lung Cancer* 2014; **84**: 13–22.  
55  
56 374 [29] Amos A. Women and smoking. *British Medical Bulletin* 1996; **52**: 74–89.  
57  
58  
59  
60

- 1  
2  
3 375 [30] Amos A. From social taboo to ‘torch of freedom’: the marketing of cigarettes to women. *Tobacco*  
4 376 *Control* 2000; **9**: 3–8.
- 6 377 [31] Pampel FC. Cigarette Use and the Narrowing Sex Differential in Mortality. *Population and*  
7 378 *Development Review* 2002; **28**: 77–104.
- 9 379 [32] Carlson E, Hoffmann R. The State Socialist Mortality Syndrome. *Population Research and*  
10 380 *Policy Review* 2011; **30**: 355–79.
- 12 381 [33] Meslé F, Vallin J. The End of East–West Divergence in European Life Expectancies? An  
13 382 Introduction to the Special Issue. *European Journal of Population* 2017; **33**: 615–27.
- 15 383 [34] Vineis P, Huybrechts I, Millett C, Weiderpass E. Climate change and cancer: converging policies.  
16 384 *Molecular Oncology* 2021; **15**: 764–9.
- 18 385 [35] Malhotra J, Malvezzi M, Negri E, La Vecchia C, Boffetta P. Risk factors for lung cancer  
19 386 worldwide. *Eur Respir J* 2016; **48**: 889–902.
- 21 387 [36] Cohen AJ, Brauer M, Burnett R, *et al*. Estimates and 25-year trends of the global burden of  
22 388 disease attributable to ambient air pollution: an analysis of data from the Global Burden of Diseases  
23 389 Study 2015. *The Lancet* 2017; **389**: 1907–18.
- 25 390 [37] Rahib L, Wehner MR, Matrisian LM, Nead KT. Estimated Projection of US Cancer Incidence  
26 391 and Death to 2040. ; : 14.
- 28 392 [38] Smittenaar CR, Petersen KA, Stewart K, Moitt N. Cancer incidence and mortality projections in  
29 393 the UK until 2035. *Br J Cancer* 2016; **115**: 1147–55.
- 31 394 [39] Jha P, Peto R. Global Effects of Smoking, of Quitting, and of Taxing Tobacco. *New England*  
32 395 *Journal of Medicine* 2014; **370**: 60–8.
- 34 396 [40] Bray F, Tyczynski JE, Parkin DM. Going up or coming down? The changing phases of the lung  
35 397 cancer epidemic from 1967 to 1999 in the 15 European Union countries. *Eur J Cancer* 2004; **40**: 96–  
36 398 125.
- 38 399 [41] Jonathan Samet, Soon-Young Yoon. Women and the tobacco epidemic. Challenges for the 21st  
39 400 century. The World Health Organization in collaboration with the Institute for Global Tobacco Control  
40 401 Johns Hopkins School of Public Health. 2001.
- 42 402 [42] Tyczynski JE, Bray F, Aareleid T, *et al*. Lung cancer mortality patterns in selected Central,  
43 403 Eastern and Southern European countries. *Int J Cancer* 2004; **109**: 598–610.
- 45 404 [43] Notley C, Ward E, Dawkins L, Holland R. The unique contribution of e-cigarettes for tobacco  
46 405 harm reduction in supporting smoking relapse prevention. *Harm Reduction Journal* 2018; **15**: 31.
- 48 406 [44] Marques P, Piqueras L, Sanz M-J. An updated overview of e-cigarette impact on human health.  
49 407 *Respiratory Research* 2021; **22**: 151.
- 51 408 [45] Dai X, Gakidou E, Lopez AD. Evolution of the global smoking epidemic over the past half  
52 409 century: strengthening the evidence base for policy action. *Tob Control* 2022; **31**: 129–37.
- 54 410 [46] de Koning HJ, van der Aalst CM, de Jong PA, *et al*. Reduced Lung-Cancer Mortality with  
55 411 Volume CT Screening in a Randomized Trial. *N Engl J Med* 2020; **382**: 503–13.
- 57 412 [47] Yousaf-Khan U, van der Aalst C, de Jong PA, *et al*. Final screening round of the NELSON lung  
58 413 cancer screening trial: the effect of a 2.5-year screening interval. *Thorax* 2017; **72**: 48–56.

1  
2  
3 414 [48] Gredner T, Mons U, Niedermaier T, Brenner H, Soerjomataram I. Impact of tobacco control  
4 415 policies implementation on future lung cancer incidence in Europe: An international, population-based  
5 416 modeling study. *The Lancet Regional Health - Europe* 2021; **4**: 100074.

6  
7 417

8  
9 418 Figures

10  
11 419 Figure 1: Lung cancer mortality compared with mortality from other causes of malignant neoplasms,  
12 420 2020, Male-Female

13  
14 421 Figure 2: Lung cancer age-standardized mortality rates per 100,000 by world regions and sex in 2020,  
15 422 Male-Female

16  
17 423 Figure 3: Lung cancer mortality projections worldwide from 2020 to 2040 by sex and the Human  
18 424 Development Index (HDI)

**Figure 1: Lung cancer mortality compared with mortality from other causes of malignant neoplasms, 2020**  
**Male**

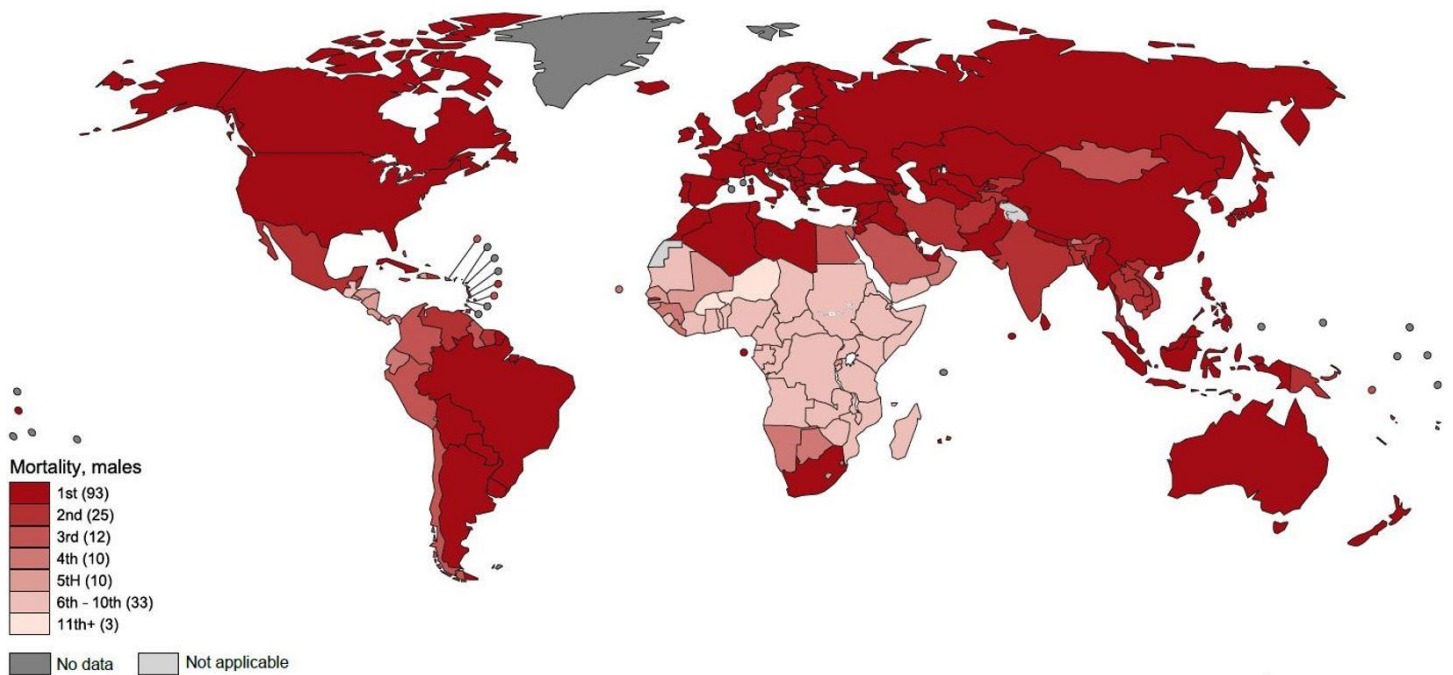

**Female**

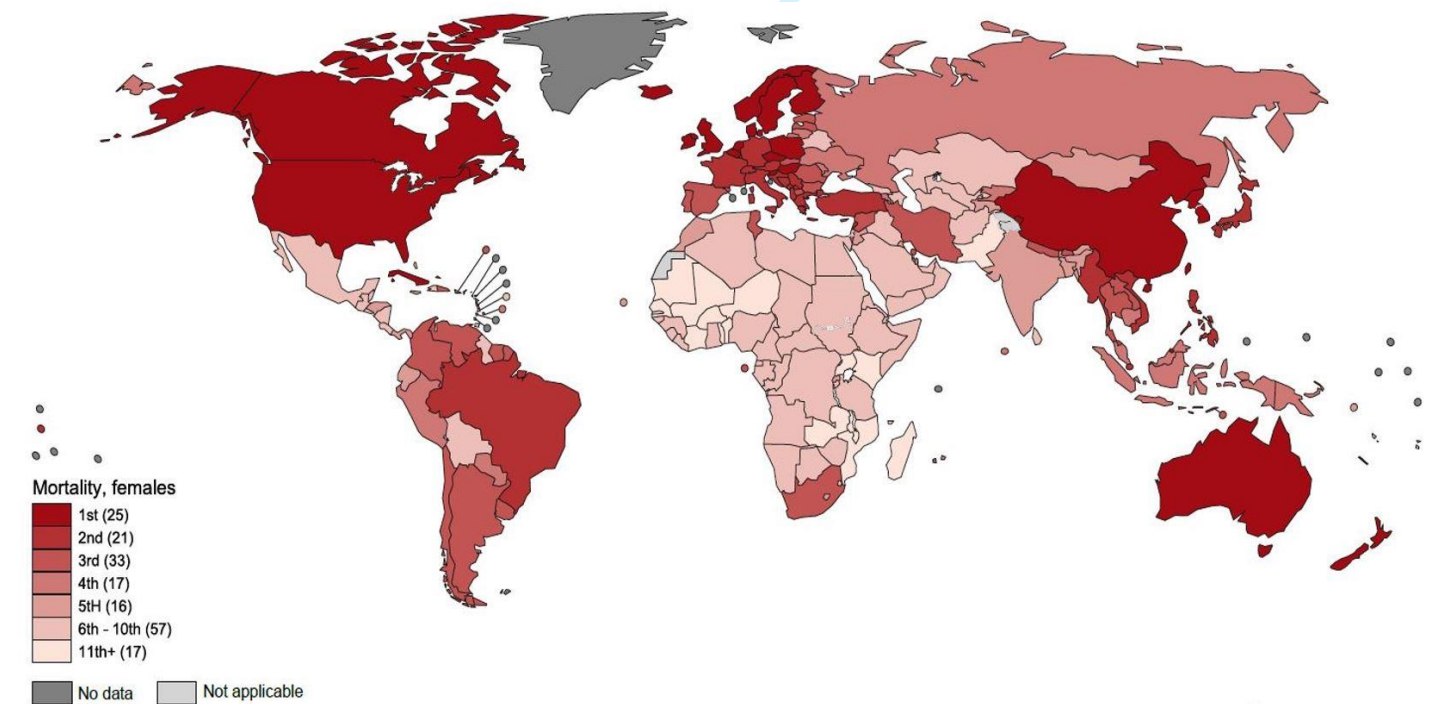

**Figure 2: Lung cancer age-standardized mortality rates per 100,000 by world regions and sex in 2020**

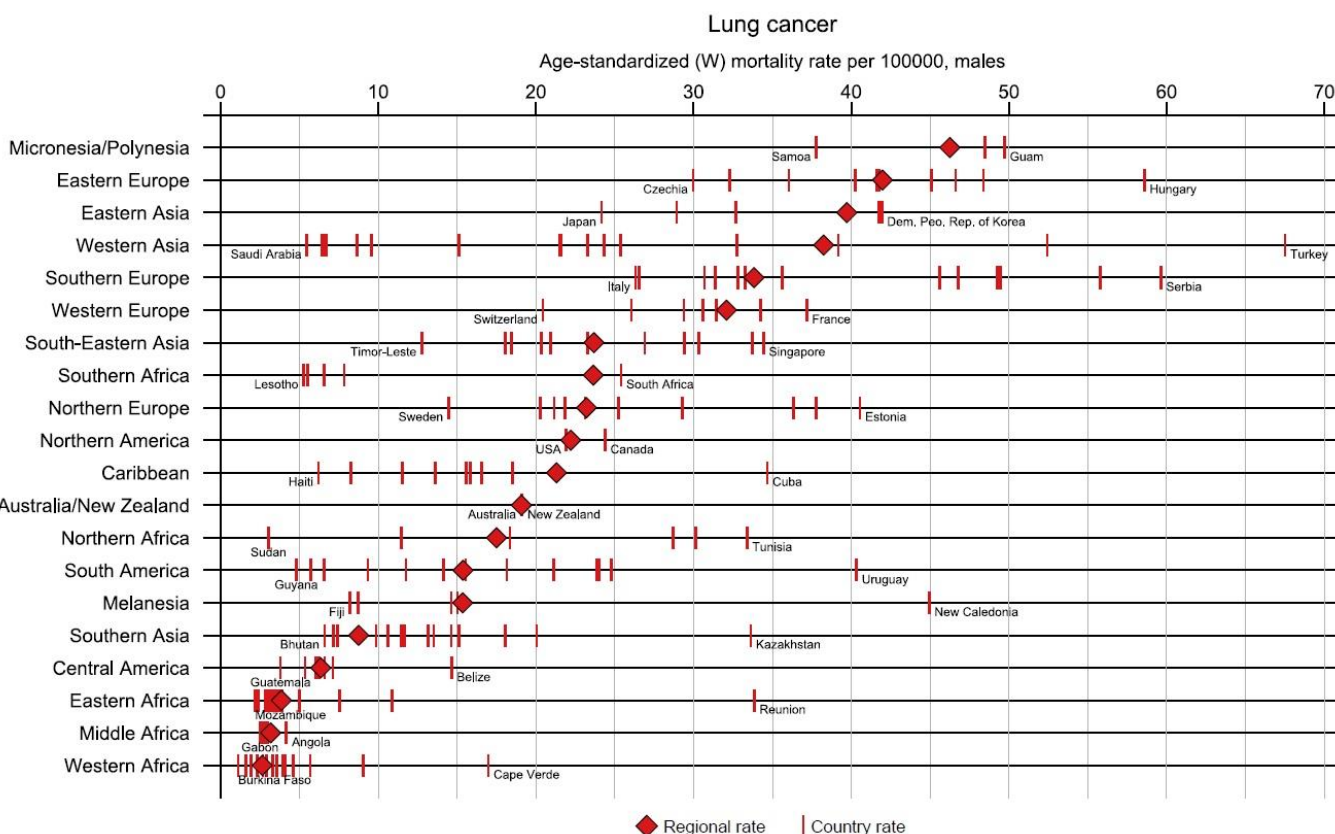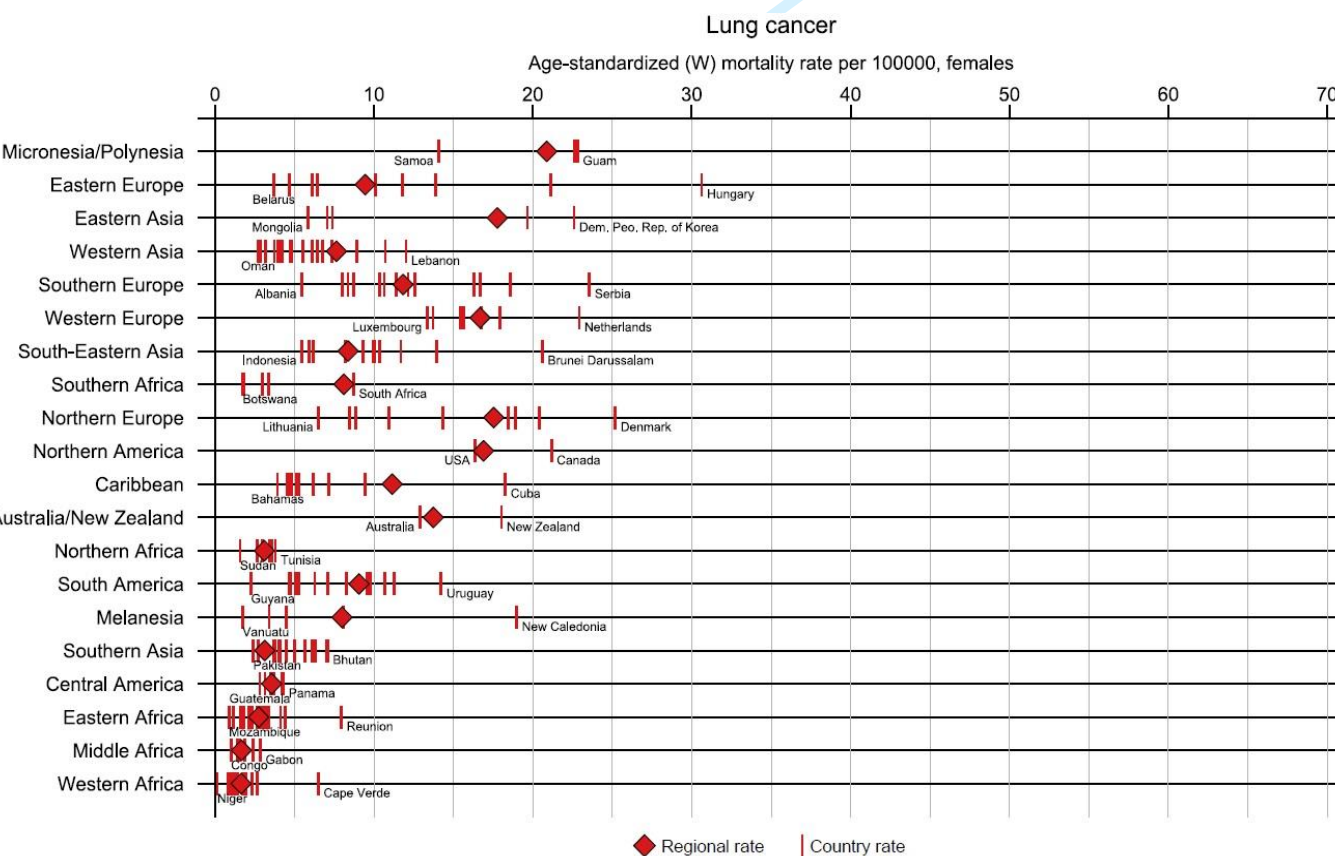

**Figure 3: Lung cancer mortality projections worldwide from 2020 to 2040 by sex and the Human Development Index (HDI)**

**Lung cancer mortality by sex**

**A**



**B**



view only

Supplemental material - Appendix

**Figure 1: Lung cancer mortality compared with mortality from other causes of malignant neoplasms, 2020, Male - Female**

The boundaries and names shown and the designations used on this map do not imply the expression of any opinion whatsoever on the part of the World Health Organization concerning the legal status of any country, territory, city or area or of its authorities, or concerning the delimitation of its frontiers or boundaries. Dotted and dashed lines on maps represent approximate border lines for which there may not yet be full agreement.

Data source: Globocan 2020, Map production: CSU, World Health Organization

Ferlay J, Ervik M, Lam F, Colombet M, Mery L, Piñeros M, Znaor A, Soerjomataram I, Bray F (2020). Global Cancer Observatory: Cancer Today. Lyon, France: International Agency for Research on Cancer. Available from: <https://gco.iarc.fr/today>, accessed [13 April 2022].

Appendices

Lung cancer mortality by sex - very high HDI countries

A

B



**Lung cancer mortality by sex - high HDI countries**

**C**



**D**

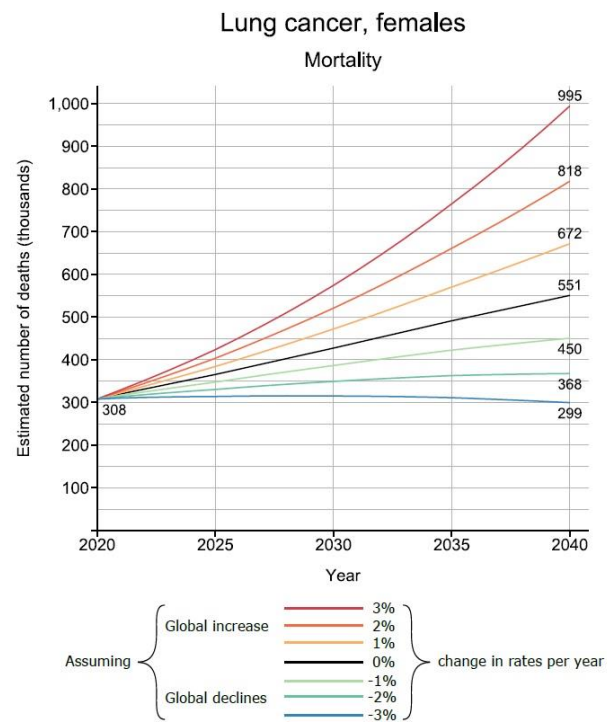

**Lung cancer mortality by sex - medium HDI countries**

**E**



**F**

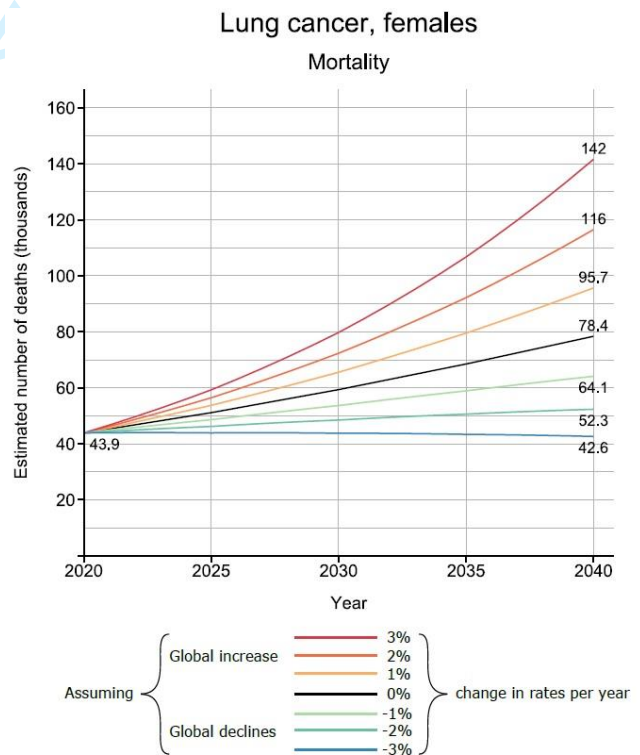



Lung cancer mortality by sex - low HDI countries

G

H



Review only

## STROBE Statement—checklist of items that should be included in reports of observational studies

|                              | Item No                                                                                                                                                                                                                                                                                                   | Recommendation                                                                                                                                                                                                                                                                                                                                                                                                                                                         | Page No |
|------------------------------|-----------------------------------------------------------------------------------------------------------------------------------------------------------------------------------------------------------------------------------------------------------------------------------------------------------|------------------------------------------------------------------------------------------------------------------------------------------------------------------------------------------------------------------------------------------------------------------------------------------------------------------------------------------------------------------------------------------------------------------------------------------------------------------------|---------|
| <b>Title and abstract</b>    | 1                                                                                                                                                                                                                                                                                                         | (a) Indicate the study's design with a commonly used term in the title or the abstract                                                                                                                                                                                                                                                                                                                                                                                 | 1       |
|                              |                                                                                                                                                                                                                                                                                                           | (b) Provide in the abstract an informative and balanced summary of what was done and what was found                                                                                                                                                                                                                                                                                                                                                                    | 2       |
| <b>Introduction</b>          |                                                                                                                                                                                                                                                                                                           |                                                                                                                                                                                                                                                                                                                                                                                                                                                                        |         |
| Background/rationale         | 2                                                                                                                                                                                                                                                                                                         | Explain the scientific background and rationale for the investigation being reported                                                                                                                                                                                                                                                                                                                                                                                   | 4       |
| Objectives                   | 3                                                                                                                                                                                                                                                                                                         | State specific objectives, including any prespecified hypotheses                                                                                                                                                                                                                                                                                                                                                                                                       | 4       |
| <b>Methods</b>               |                                                                                                                                                                                                                                                                                                           |                                                                                                                                                                                                                                                                                                                                                                                                                                                                        |         |
| Study design                 | 4                                                                                                                                                                                                                                                                                                         | Present key elements of study design early in the paper                                                                                                                                                                                                                                                                                                                                                                                                                | 4       |
| Setting                      | 5                                                                                                                                                                                                                                                                                                         | Describe the setting, locations, and relevant dates, including periods of recruitment, exposure, follow-up, and data collection                                                                                                                                                                                                                                                                                                                                        | 4       |
| Participants                 | 6                                                                                                                                                                                                                                                                                                         | (a) <i>Cohort study</i> —Give the eligibility criteria, and the sources and methods of selection of participants. Describe methods of follow-up<br><i>Case-control study</i> —Give the eligibility criteria, and the sources and methods of case ascertainment and control selection. Give the rationale for the choice of cases and controls<br><i>Cross-sectional study</i> —Give the eligibility criteria, and the sources and methods of selection of participants | 4       |
|                              |                                                                                                                                                                                                                                                                                                           | (b) <i>Cohort study</i> —For matched studies, give matching criteria and number of exposed and unexposed<br><i>Case-control study</i> —For matched studies, give matching criteria and the number of controls per case                                                                                                                                                                                                                                                 | 4       |
| Variables                    | 7                                                                                                                                                                                                                                                                                                         | Clearly define all outcomes, exposures, predictors, potential confounders, and effect modifiers. Give diagnostic criteria, if applicable                                                                                                                                                                                                                                                                                                                               | 6       |
| Data sources/<br>measurement | 8*                                                                                                                                                                                                                                                                                                        | For each variable of interest, give sources of data and details of methods of assessment (measurement). Describe comparability of assessment methods if there is more than one group                                                                                                                                                                                                                                                                                   | 4       |
| Bias                         | 9                                                                                                                                                                                                                                                                                                         | Describe any efforts to address potential sources of bias                                                                                                                                                                                                                                                                                                                                                                                                              | 7       |
| Study size                   | 10                                                                                                                                                                                                                                                                                                        | Explain how the study size was arrived at                                                                                                                                                                                                                                                                                                                                                                                                                              |         |
| Quantitative variables       | 11                                                                                                                                                                                                                                                                                                        | Explain how quantitative variables were handled in the analyses. If applicable, describe which groupings were chosen and why                                                                                                                                                                                                                                                                                                                                           | 4       |
| Statistical methods          | 12                                                                                                                                                                                                                                                                                                        | (a) Describe all statistical methods, including those used to control for confounding                                                                                                                                                                                                                                                                                                                                                                                  | 4       |
|                              |                                                                                                                                                                                                                                                                                                           | (b) Describe any methods used to examine subgroups and interactions                                                                                                                                                                                                                                                                                                                                                                                                    | 4       |
|                              | (c) Explain how missing data were addressed                                                                                                                                                                                                                                                               | 7                                                                                                                                                                                                                                                                                                                                                                                                                                                                      |         |
|                              | (d) <i>Cohort study</i> —If applicable, explain how loss to follow-up was addressed<br><i>Case-control study</i> —If applicable, explain how matching of cases and controls was addressed<br><i>Cross-sectional study</i> —If applicable, describe analytical methods taking account of sampling strategy | 4                                                                                                                                                                                                                                                                                                                                                                                                                                                                      |         |
|                              | (e) Describe any sensitivity analyses                                                                                                                                                                                                                                                                     | -                                                                                                                                                                                                                                                                                                                                                                                                                                                                      |         |

Continued on next page

| <b>Results</b>           |     |                                                                                                                                                                                                              |   |
|--------------------------|-----|--------------------------------------------------------------------------------------------------------------------------------------------------------------------------------------------------------------|---|
| Participants             | 13* | (a) Report numbers of individuals at each stage of study—eg numbers potentially eligible, examined for eligibility, confirmed eligible, included in the study, completing follow-up, and analysed            | - |
|                          |     | (b) Give reasons for non-participation at each stage                                                                                                                                                         | 4 |
|                          |     | (c) Consider use of a flow diagram                                                                                                                                                                           |   |
| Descriptive data         | 14* | (a) Give characteristics of study participants (eg demographic, clinical, social) and information on exposures and potential confounders                                                                     | 4 |
|                          |     | (b) Indicate number of participants with missing data for each variable of interest                                                                                                                          | - |
|                          |     | (c) <i>Cohort study</i> —Summarise follow-up time (eg, average and total amount)                                                                                                                             | - |
| Outcome data             | 15* | <i>Cohort study</i> —Report numbers of outcome events or summary measures over time                                                                                                                          | - |
|                          |     | <i>Case-control study</i> —Report numbers in each exposure category, or summary measures of exposure                                                                                                         | - |
|                          |     | <i>Cross-sectional study</i> —Report numbers of outcome events or summary measures                                                                                                                           | 5 |
| Main results             | 16  | (a) Give unadjusted estimates and, if applicable, confounder-adjusted estimates and their precision (eg, 95% confidence interval). Make clear which confounders were adjusted for and why they were included | 5 |
|                          |     | (b) Report category boundaries when continuous variables were categorized                                                                                                                                    | - |
|                          |     | (c) If relevant, consider translating estimates of relative risk into absolute risk for a meaningful time period                                                                                             | - |
| Other analyses           | 17  | Report other analyses done—eg analyses of subgroups and interactions, and sensitivity analyses                                                                                                               | 6 |
| <b>Discussion</b>        |     |                                                                                                                                                                                                              |   |
| Key results              | 18  | Summarise key results with reference to study objectives                                                                                                                                                     | 6 |
| Limitations              | 19  | Discuss limitations of the study, taking into account sources of potential bias or imprecision. Discuss both direction and magnitude of any potential bias                                                   | 7 |
| Interpretation           | 20  | Give a cautious overall interpretation of results considering objectives, limitations, multiplicity of analyses, results from similar studies, and other relevant evidence                                   | 6 |
| Generalisability         | 21  | Discuss the generalisability (external validity) of the study results                                                                                                                                        | 6 |
| <b>Other information</b> |     |                                                                                                                                                                                                              |   |
| Funding                  | 22  | Give the source of funding and the role of the funders for the present study and, if applicable, for the original study on which the present article is based                                                | 8 |

\*Give information separately for cases and controls in case-control studies and, if applicable, for exposed and unexposed groups in cohort and cross-sectional studies.

**Note:** An Explanation and Elaboration article discusses each checklist item and gives methodological background and published examples of transparent reporting. The STROBE checklist is best used in conjunction with this article (freely available on the Web sites of PLoS Medicine at <http://www.plosmedicine.org/>, Annals of Internal Medicine at <http://www.annals.org/>, and Epidemiology at <http://www.epidem.com/>). Information on the STROBE Initiative is available at [www.strobe-statement.org](http://www.strobe-statement.org).
